# Supplementary material
Source: publisher figshare collection journal article supplement (https://acs.figshare.com/ndownloader/files/9751288)

# **Ruthenium-Catalyzed C-H Benzoxylation of *tert*-Benzamides with Aromatic Acids by Weak Coordination**

*Nagnath Yadav More,<sup>a</sup> Kishor Padala,<sup>a</sup> and Masilamani Jeganmohan<sup>ab\*</sup>*

<sup>a</sup>Department of Chemistry, Indian Institute of Science Education and Research, Pune 411021, India

<sup>b</sup>Department of Chemistry, Indian Institute of Technology Madras, Chennai 600036, Tamil Nadu, India

*Email:* mjeganmohan@iiserpune.ac.in and mjeganmohan@iitm.ac.in

## **Supporting Information (SI)**

### **Table of Contents**

|                |                                                                                 |
|----------------|---------------------------------------------------------------------------------|
| Pages S2 – S3  | Deuterium Studies                                                               |
| Pages S4 – S57 | Copies of <sup>1</sup> H, <sup>13</sup> C NMR and DEPT Spectra of All Compounds |

## Deuterium Studies

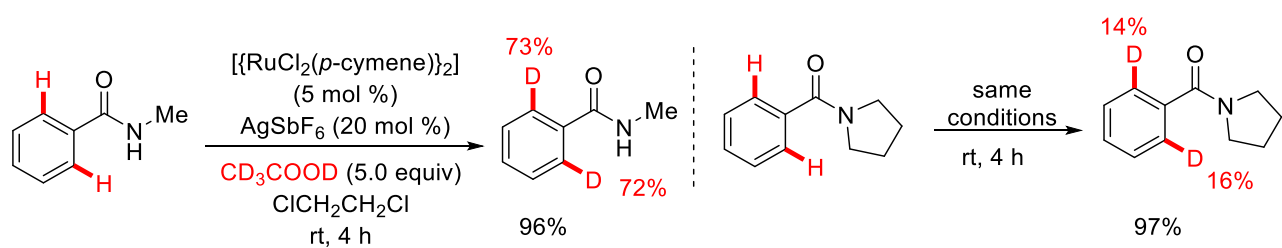

## $^1\text{H}$ NMR Spectra:

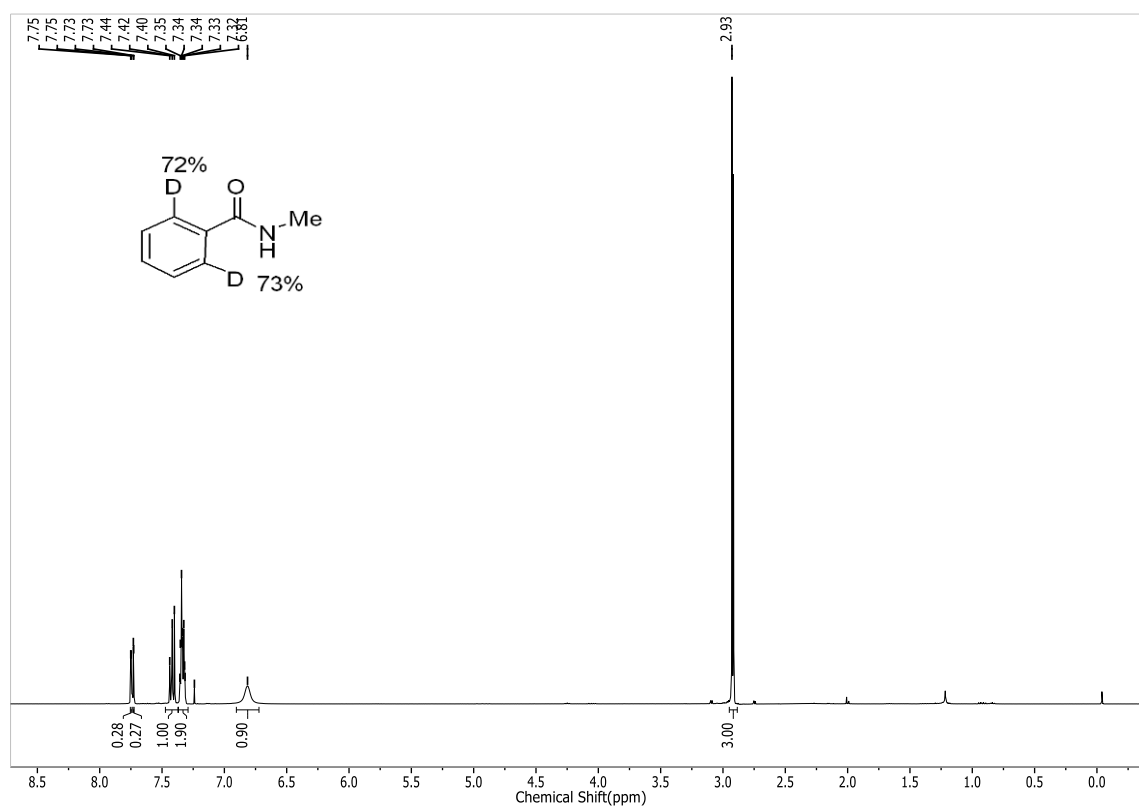

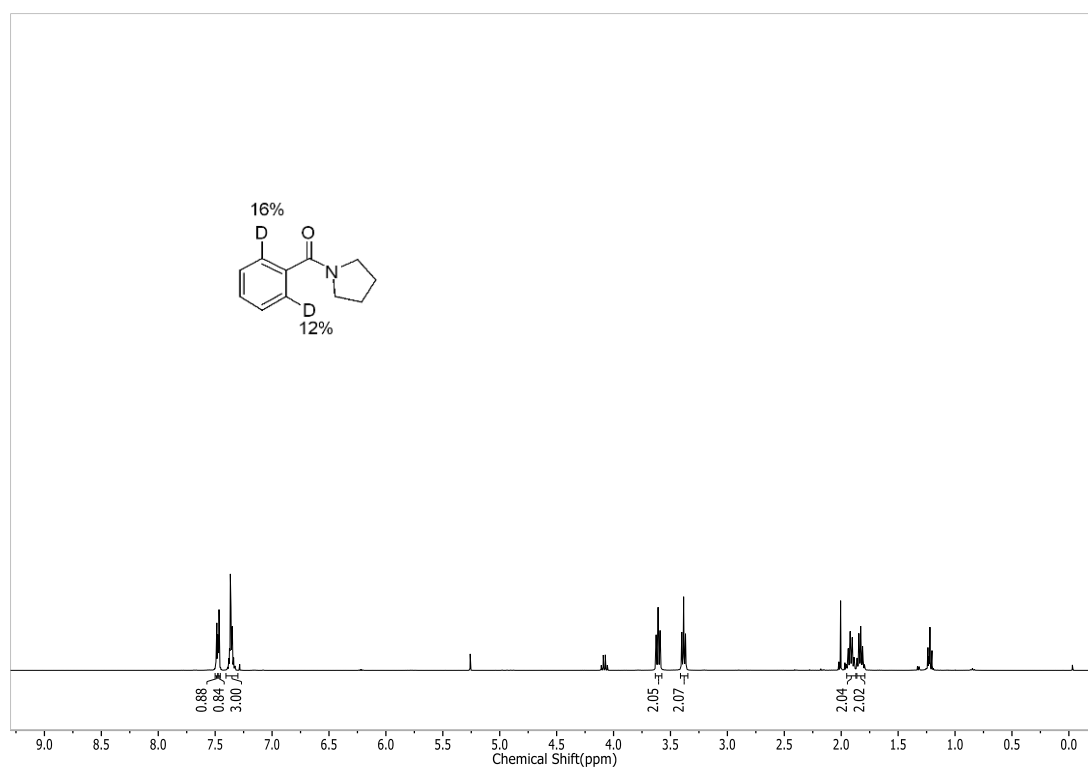

Spectral data of compound **3aa**.

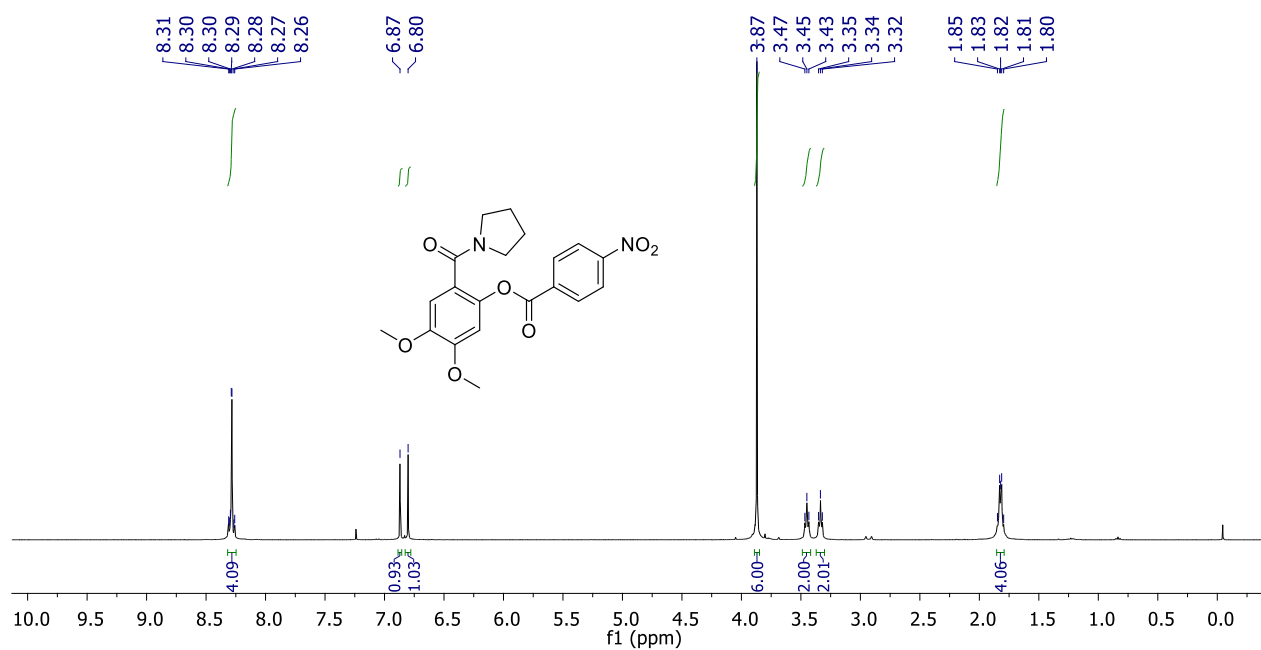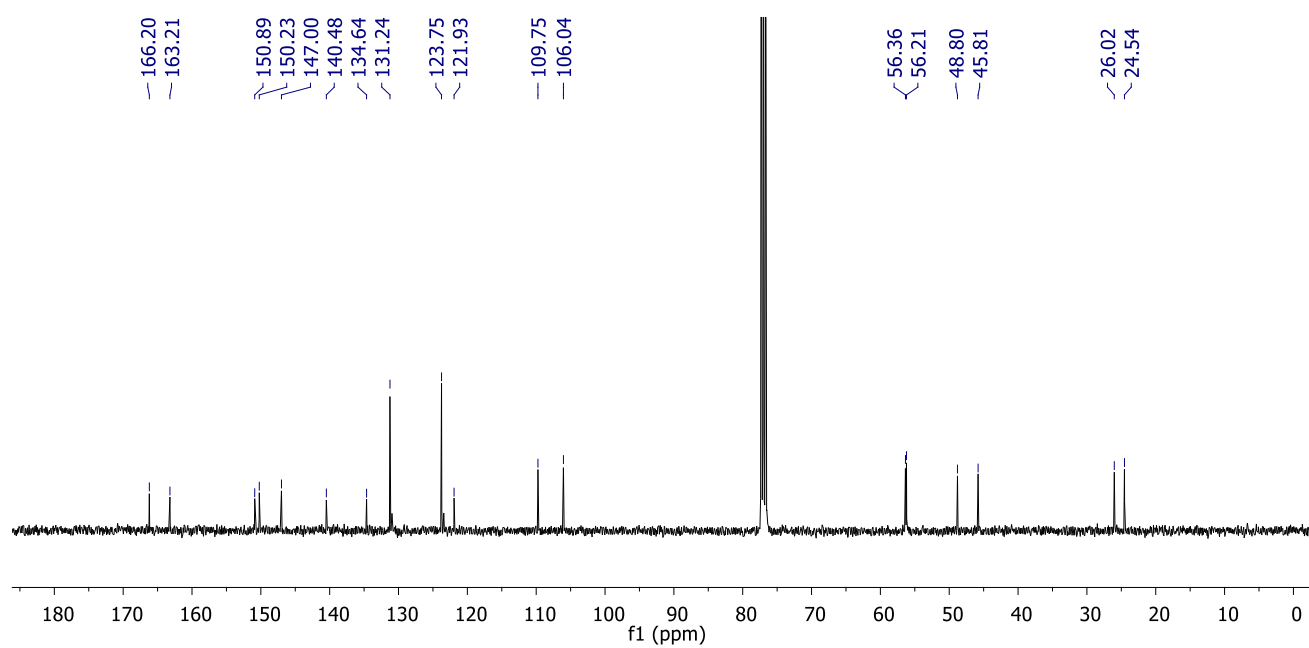

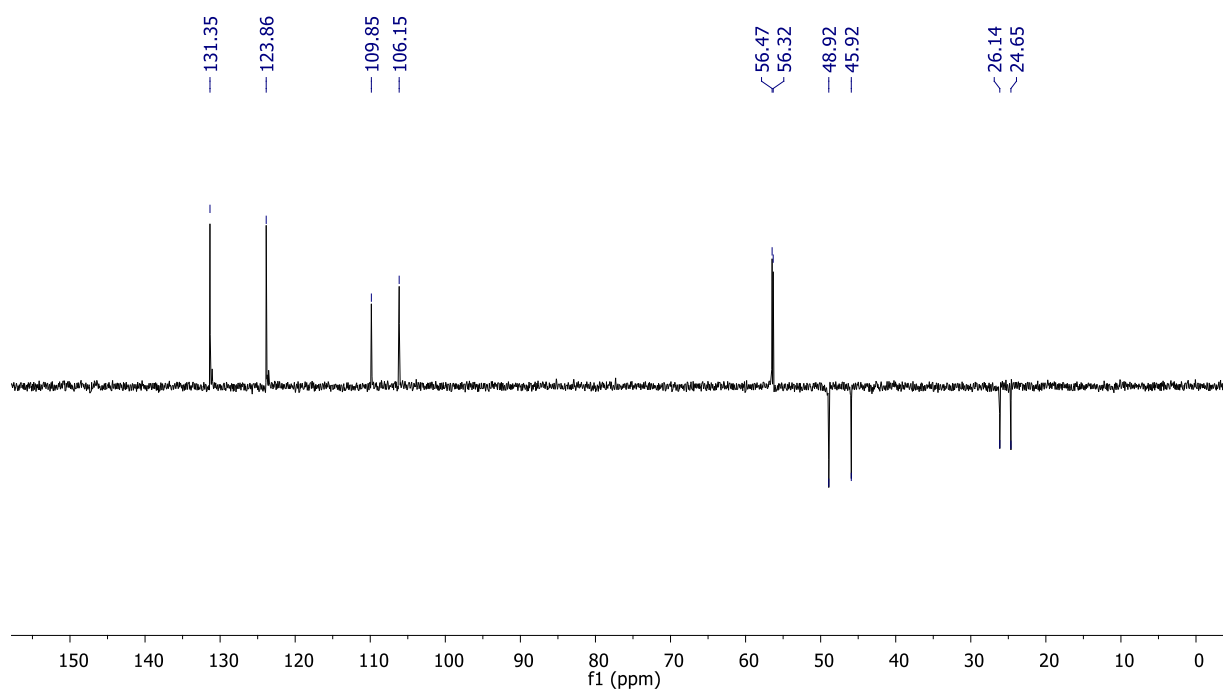

Spectral data of compound **3ba**.

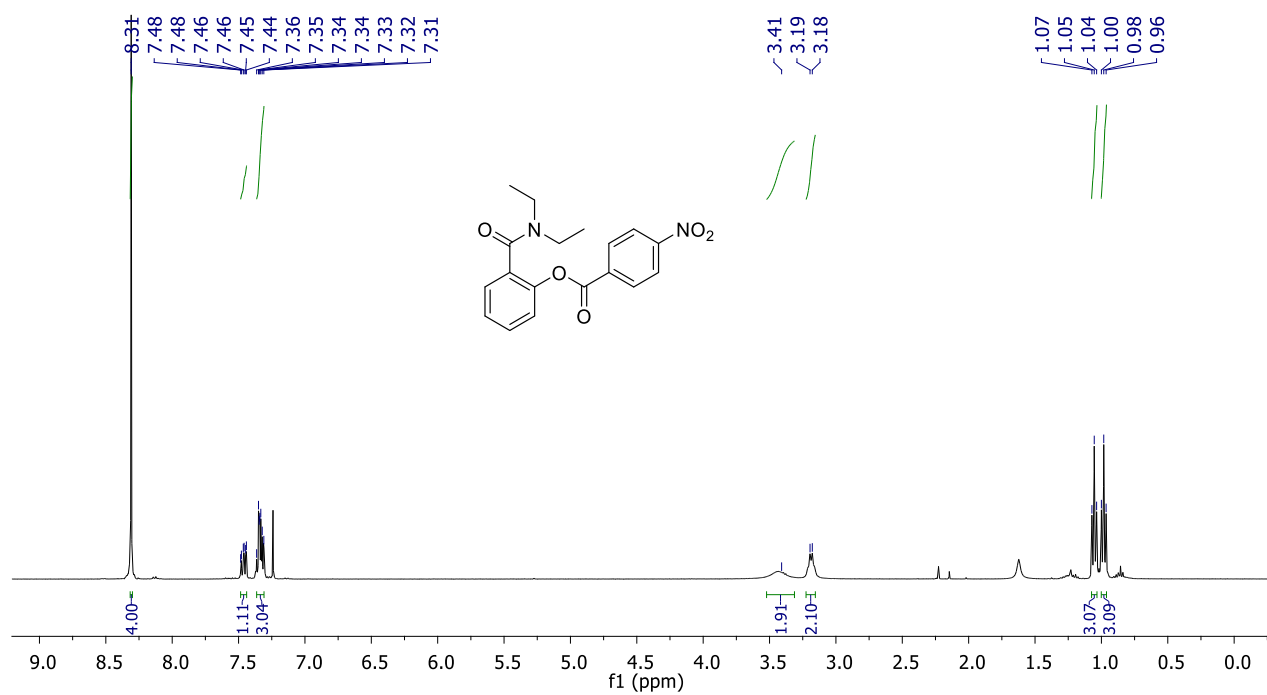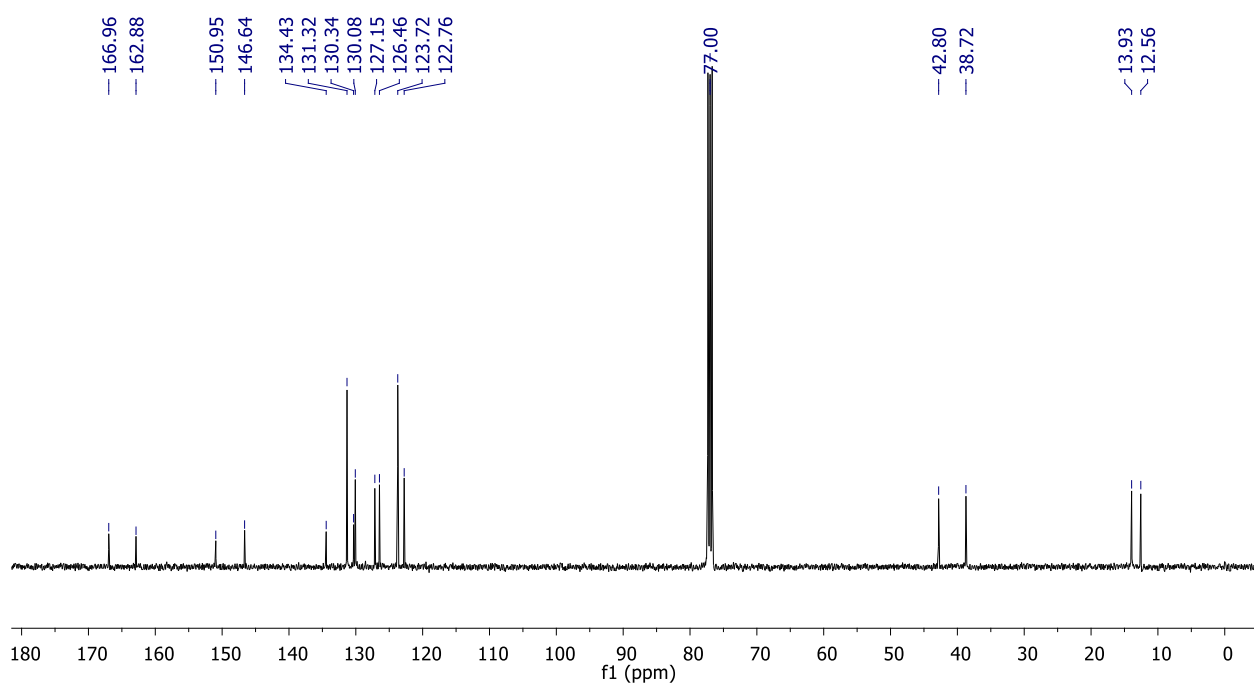

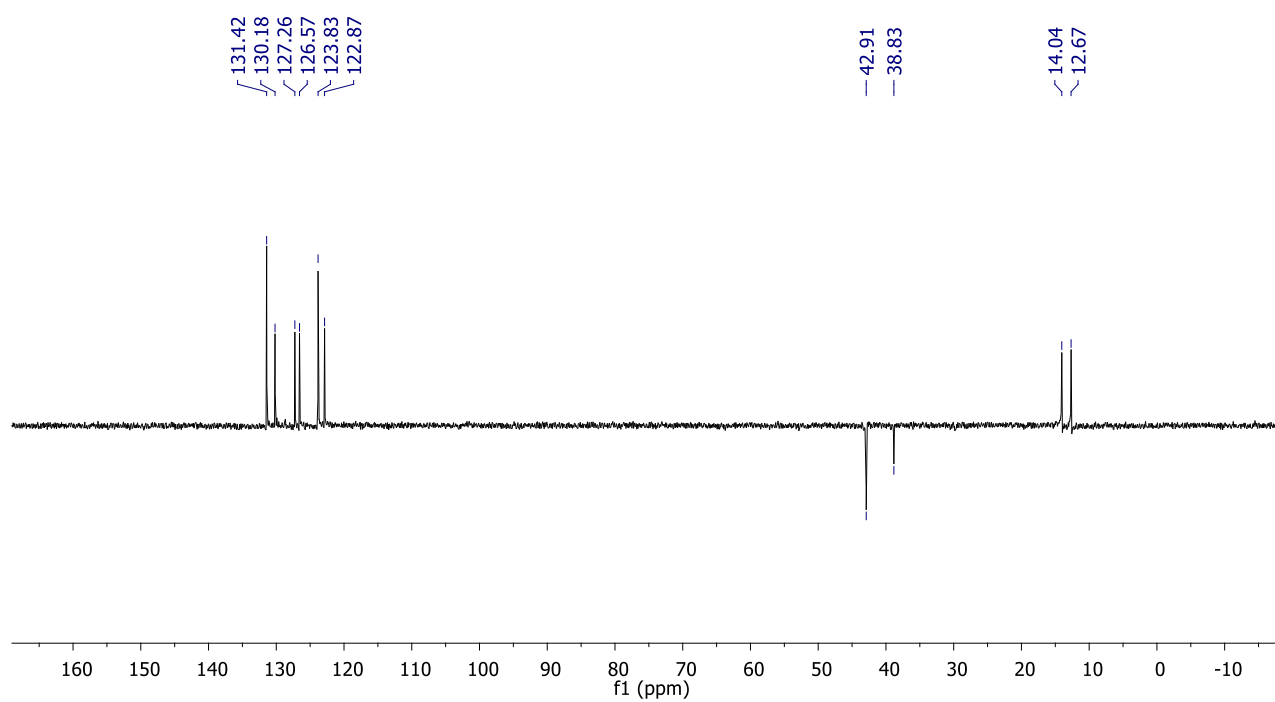

Spectral data of compound **3ca**.

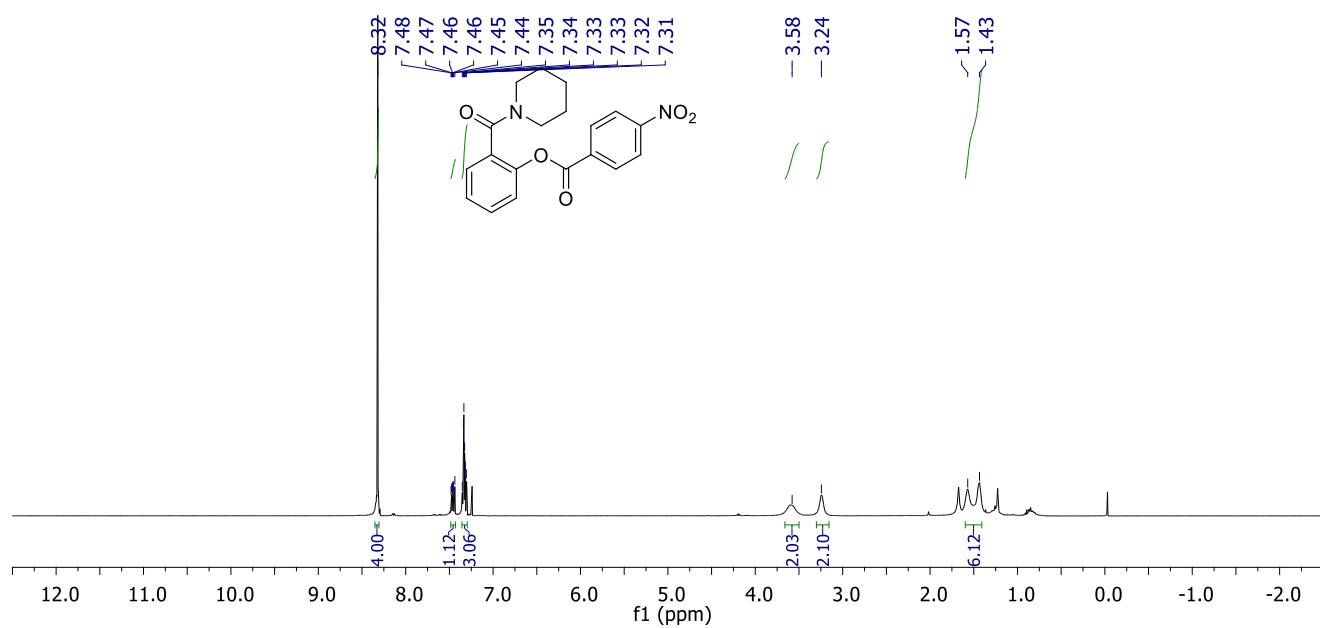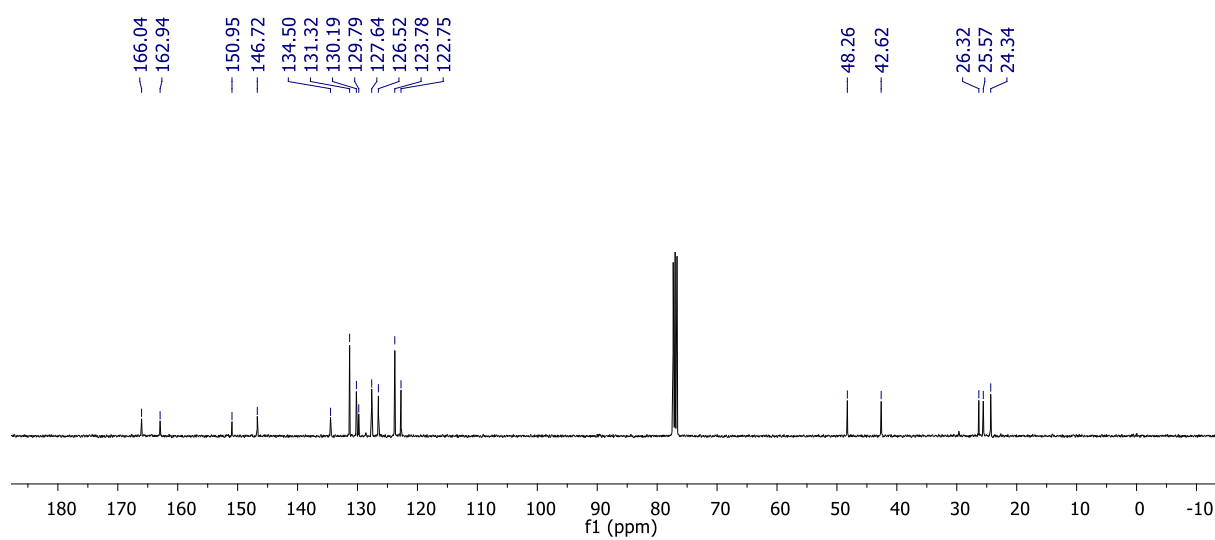



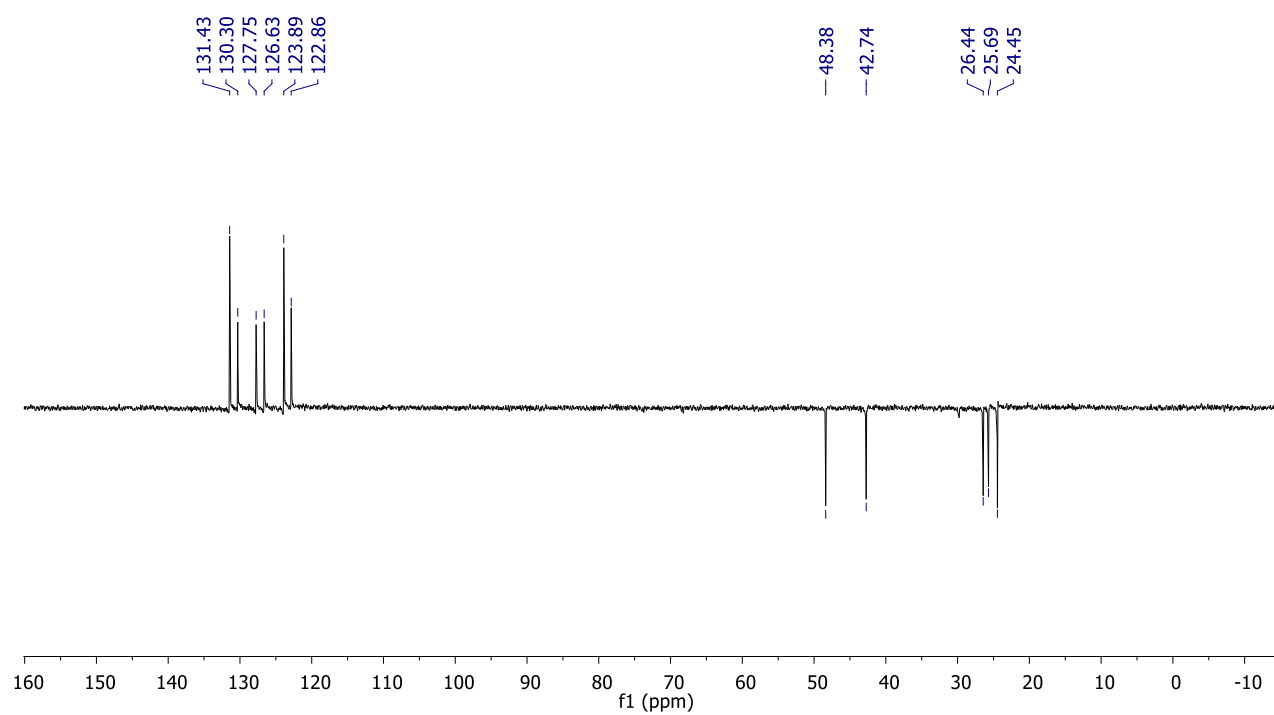

Spectral data of compound **3da**.

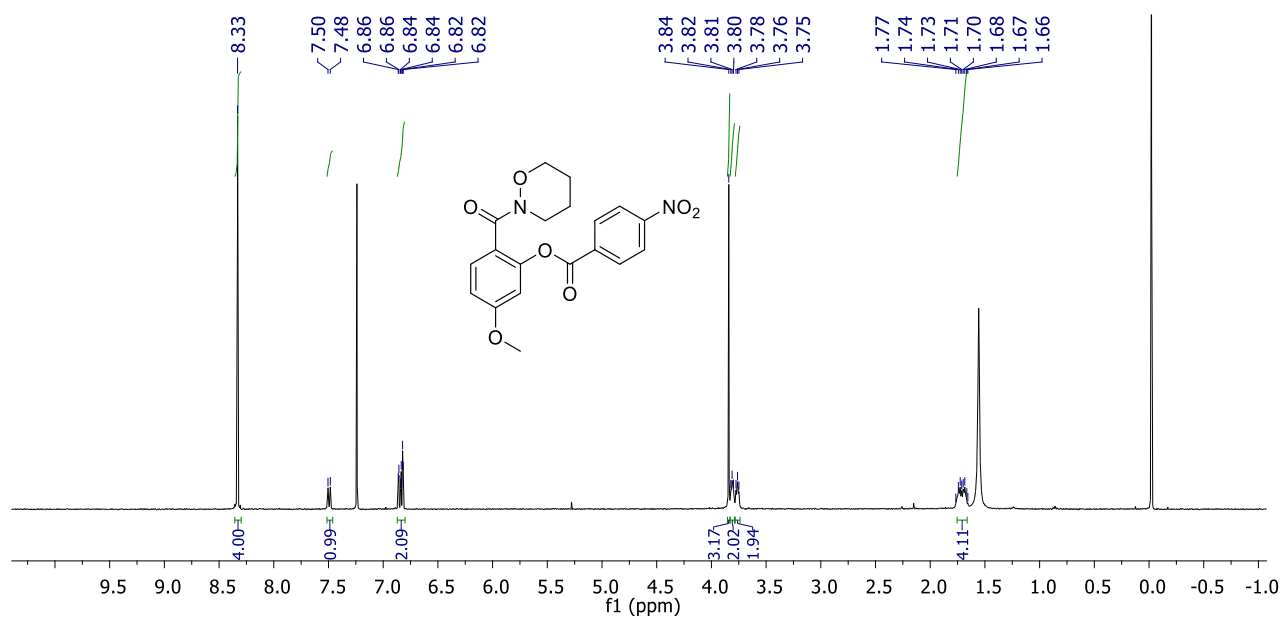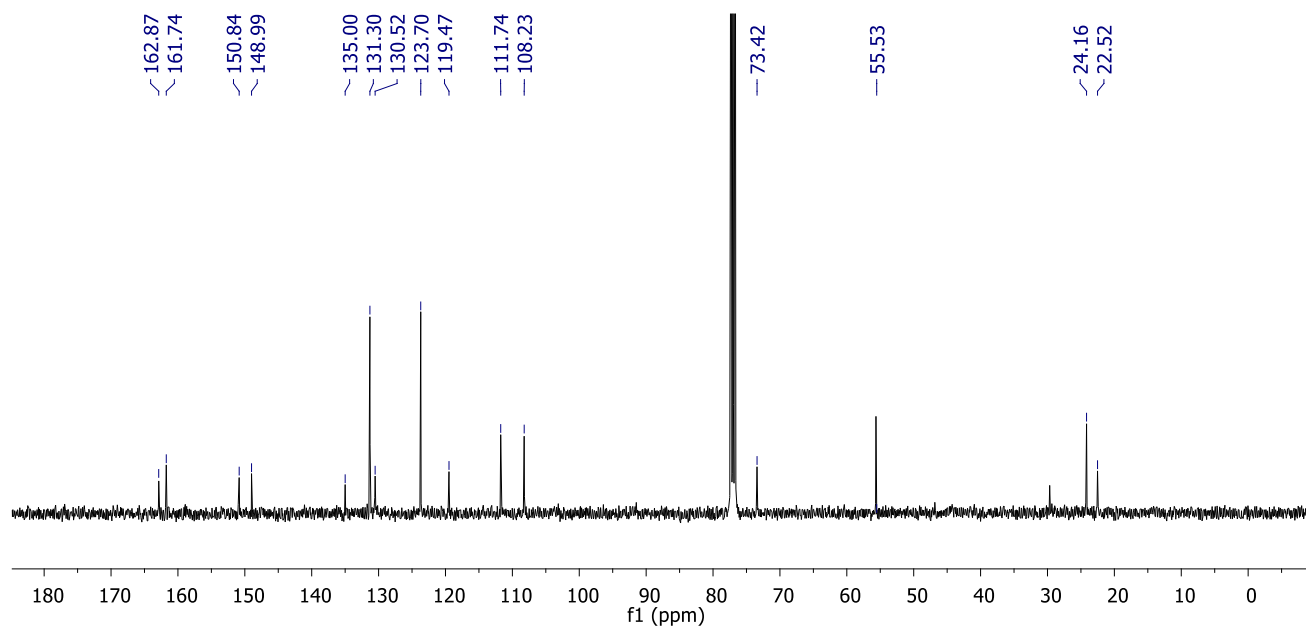

Spectral data of compound **3ea**.

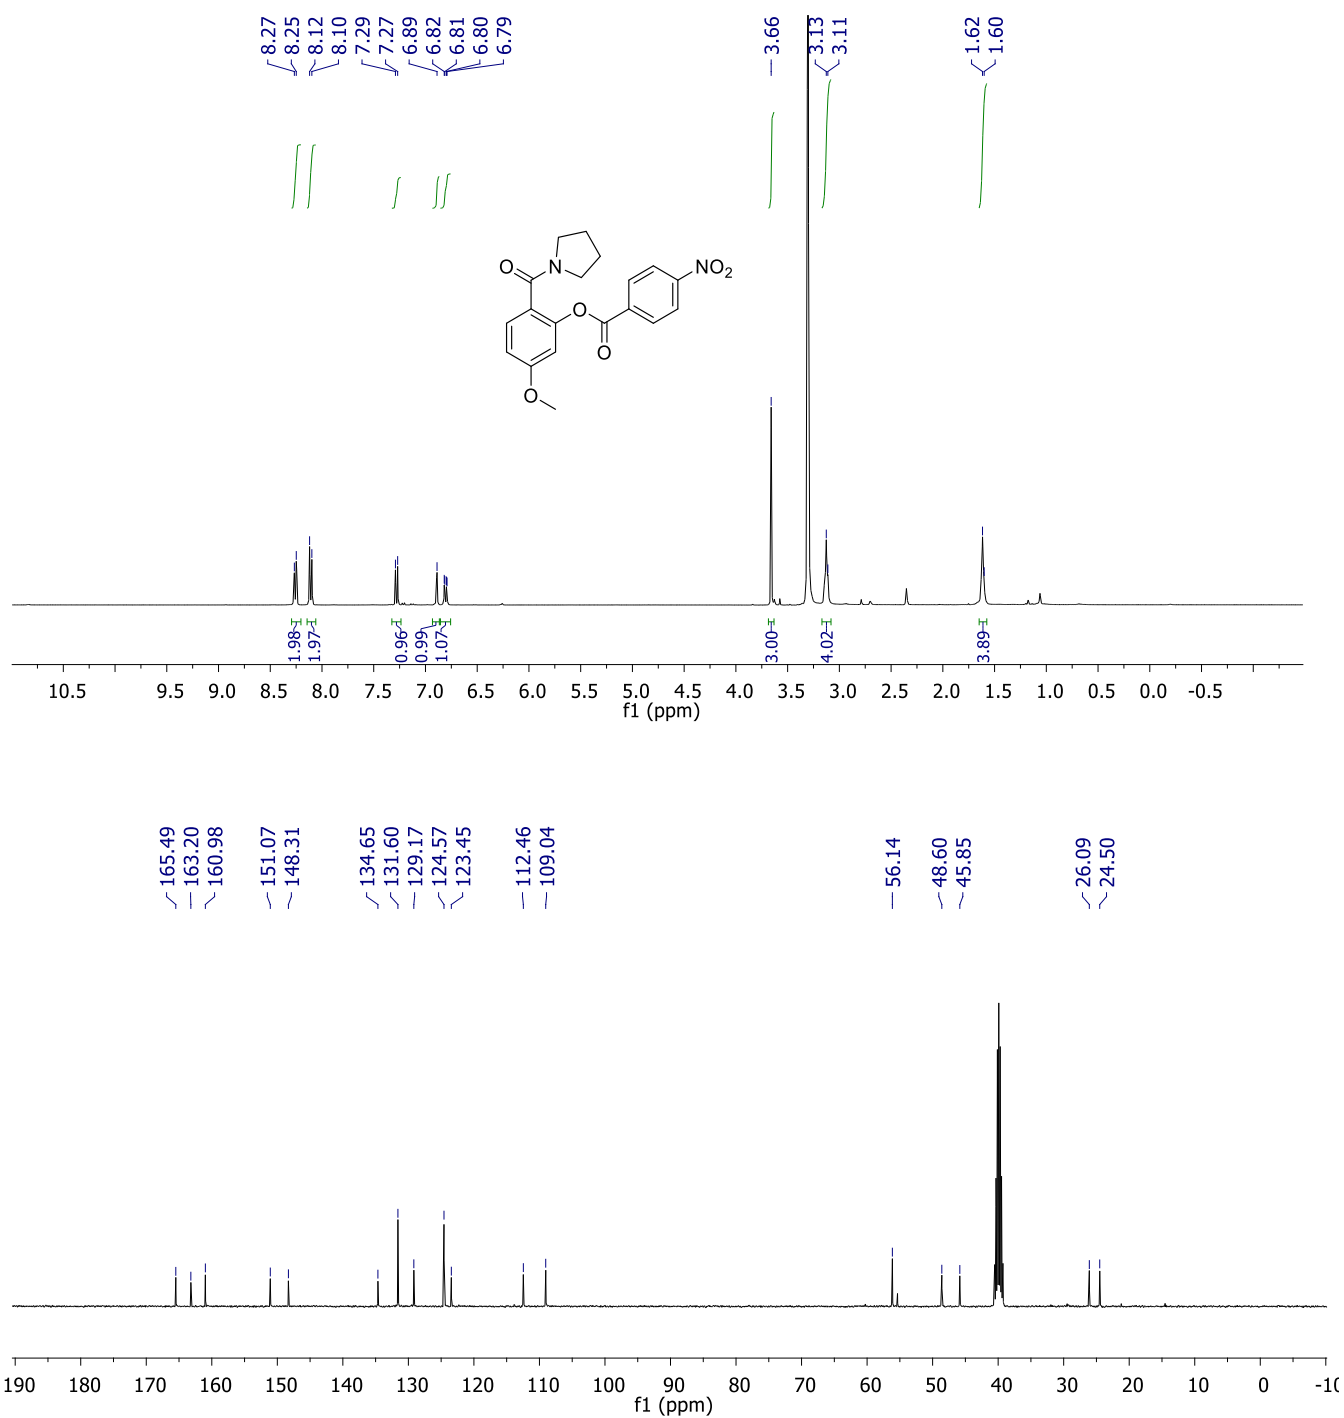

Spectral data of compound **3fa**.

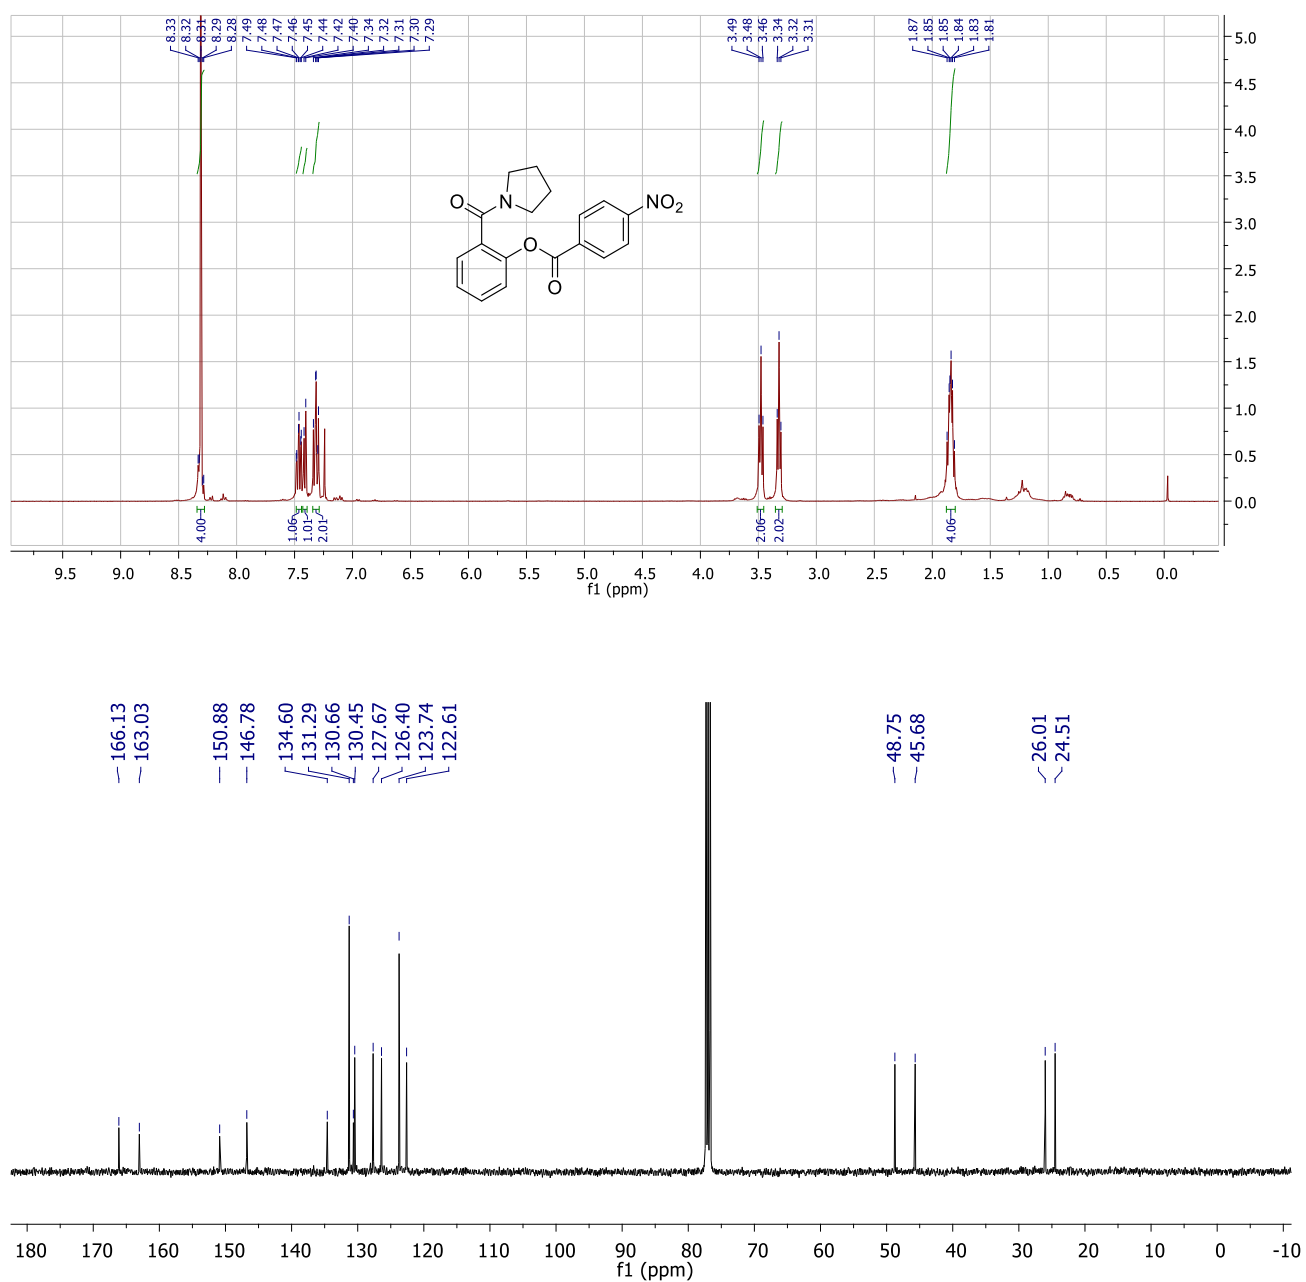

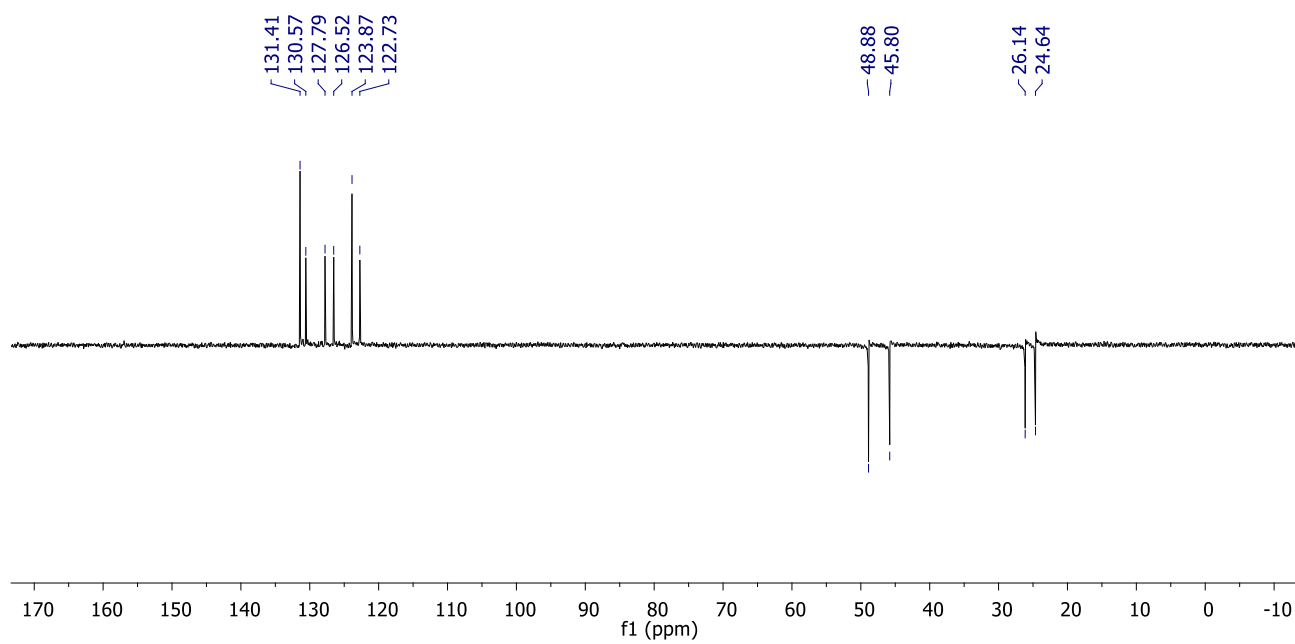

Spectral data of compound **3ga**.

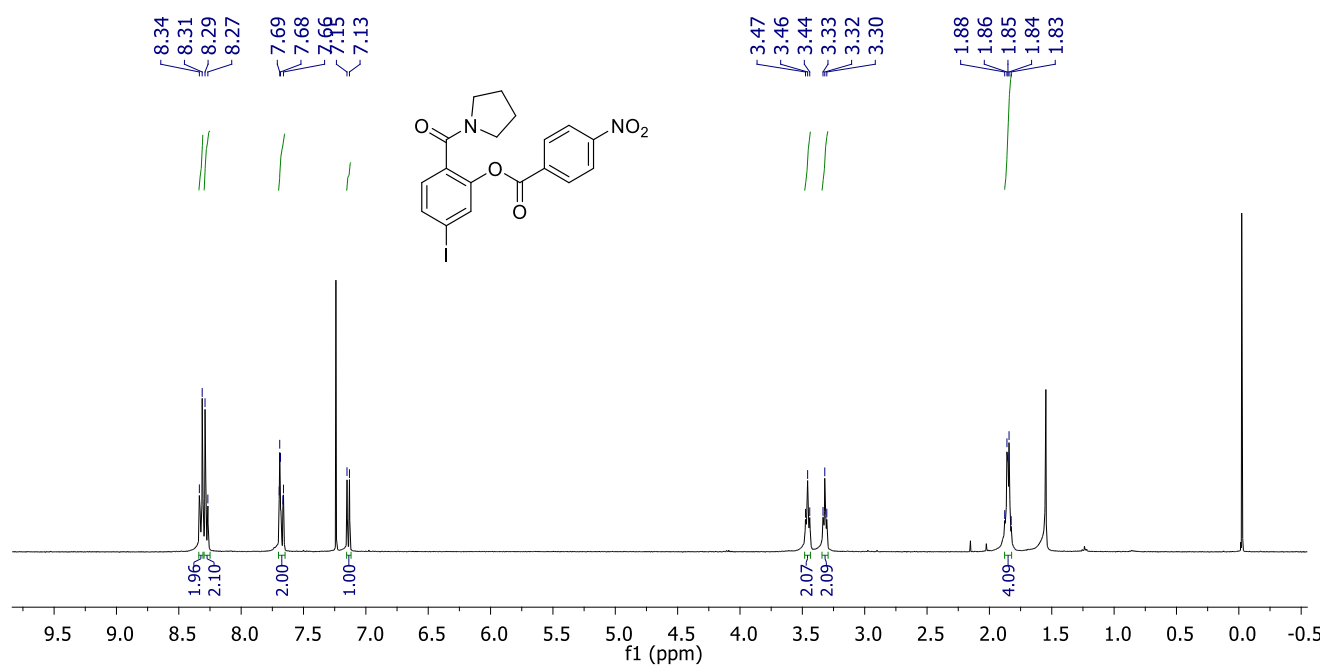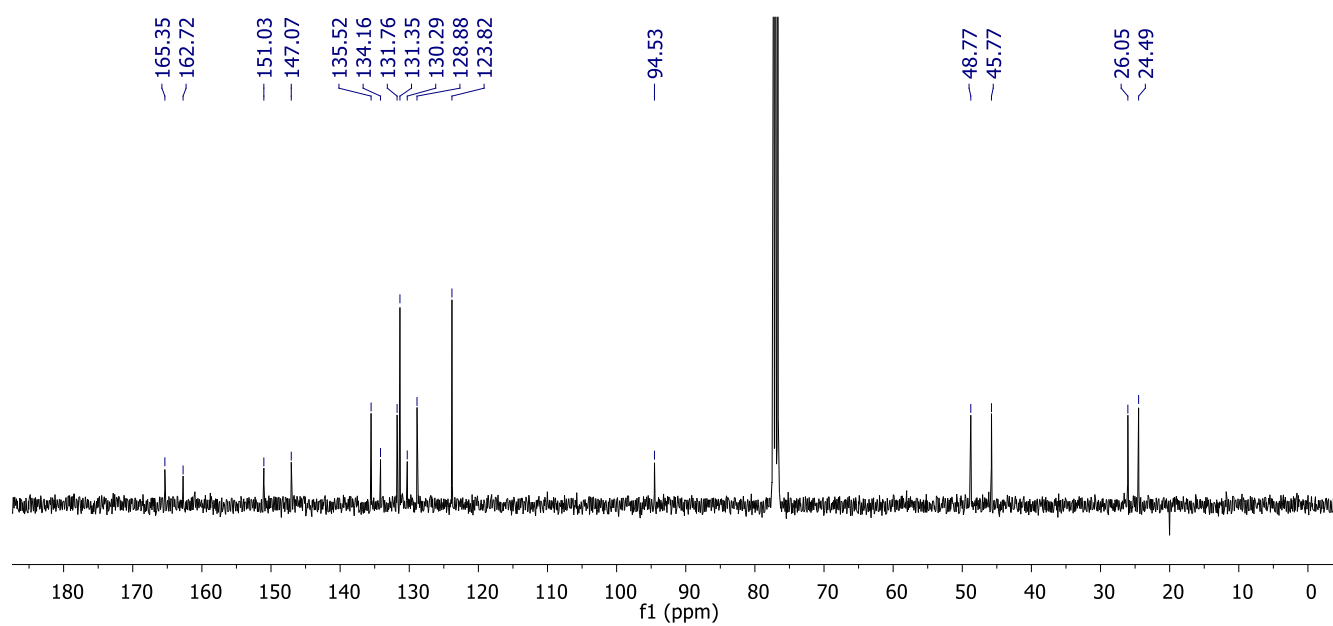

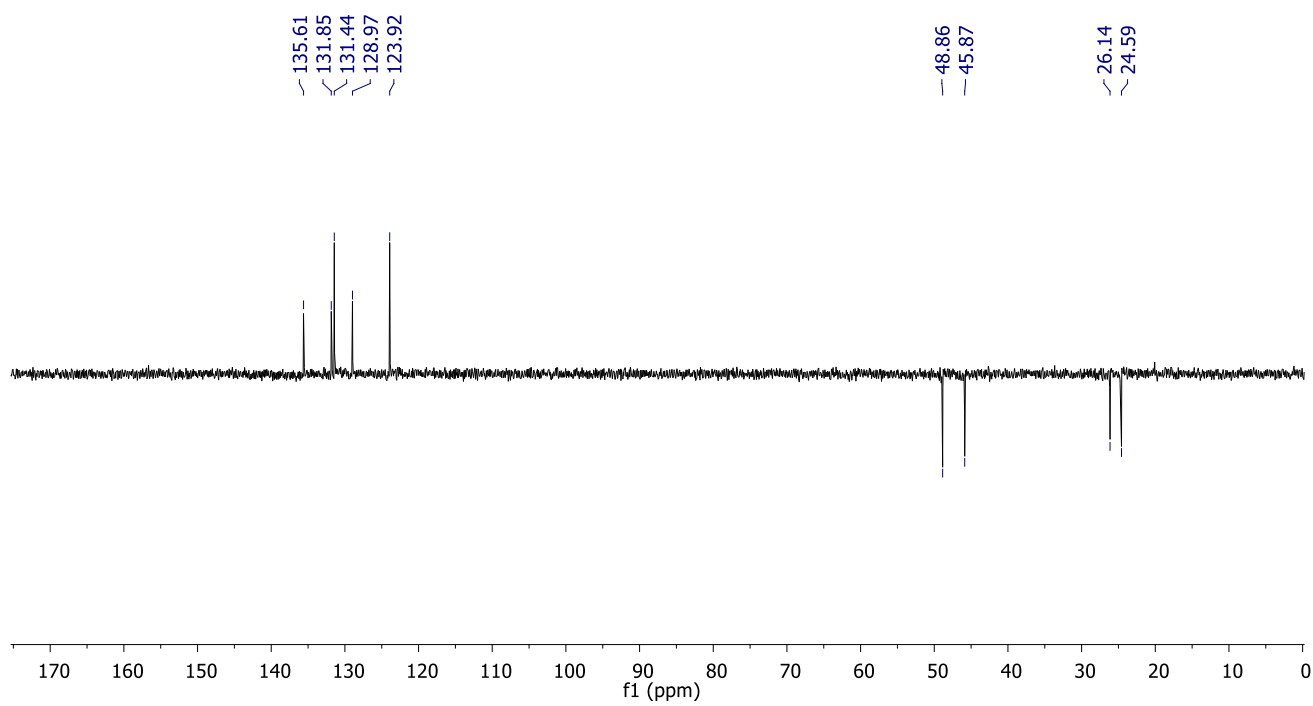

Spectral data of compound **3ha**.

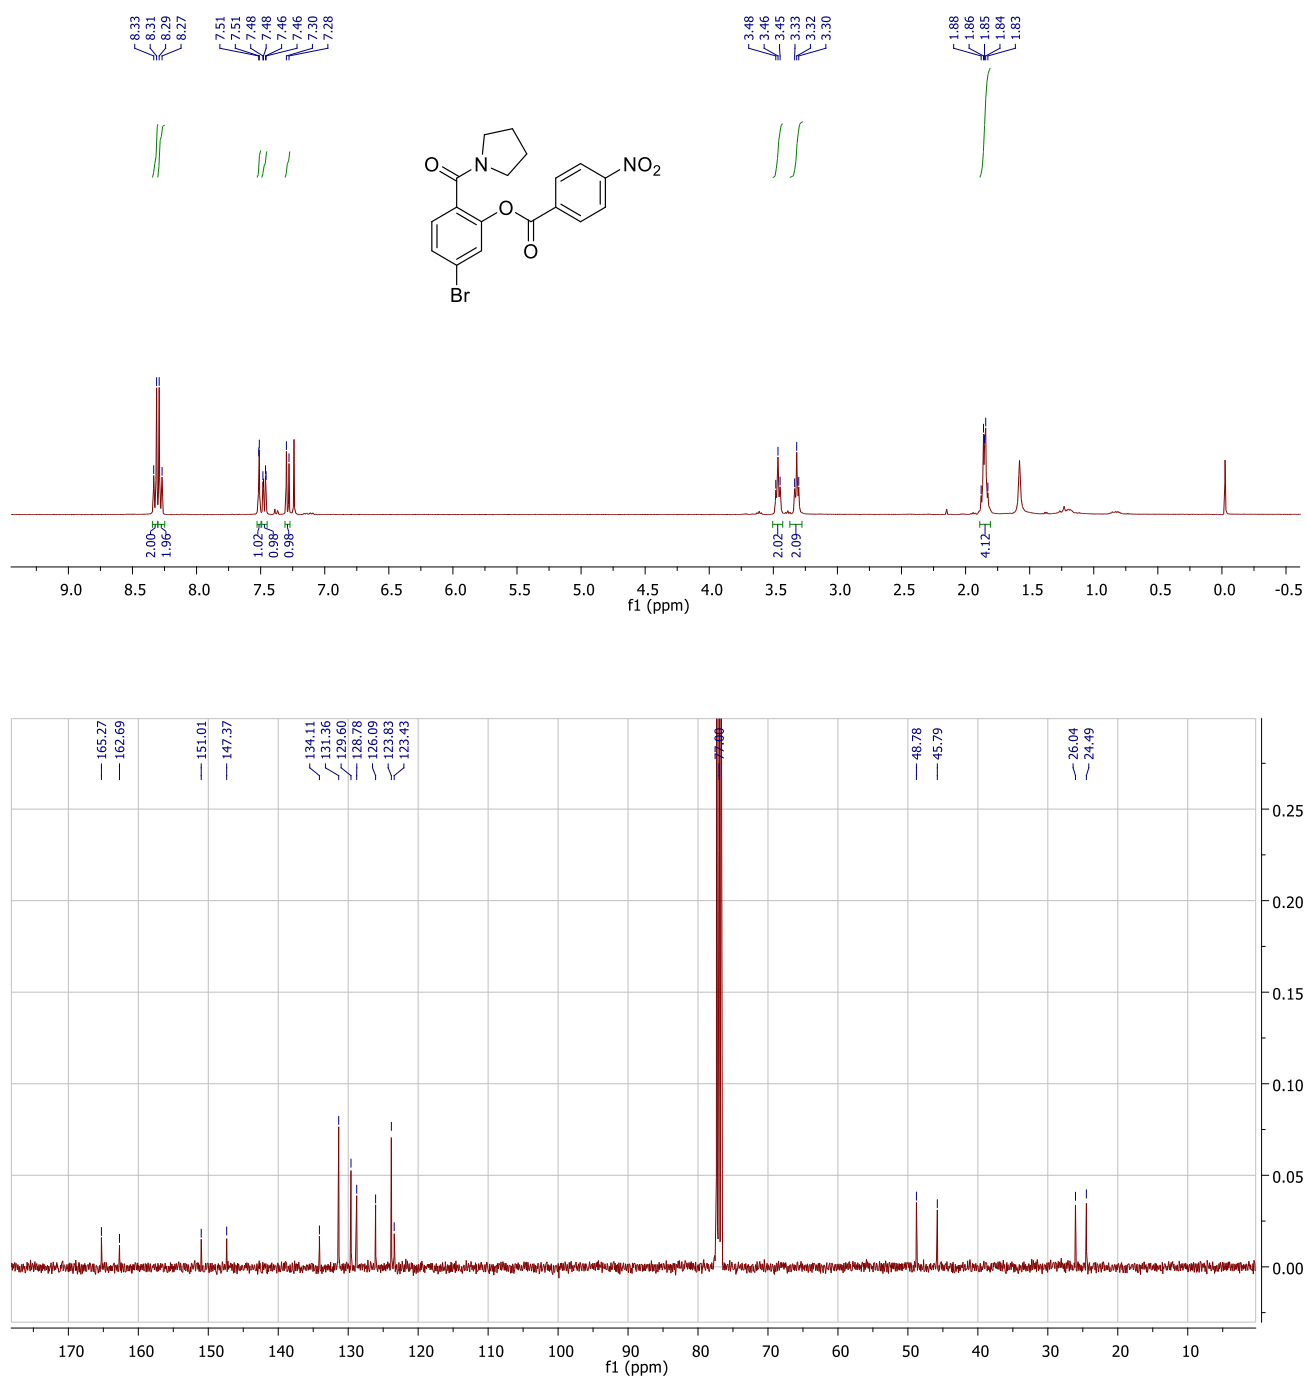



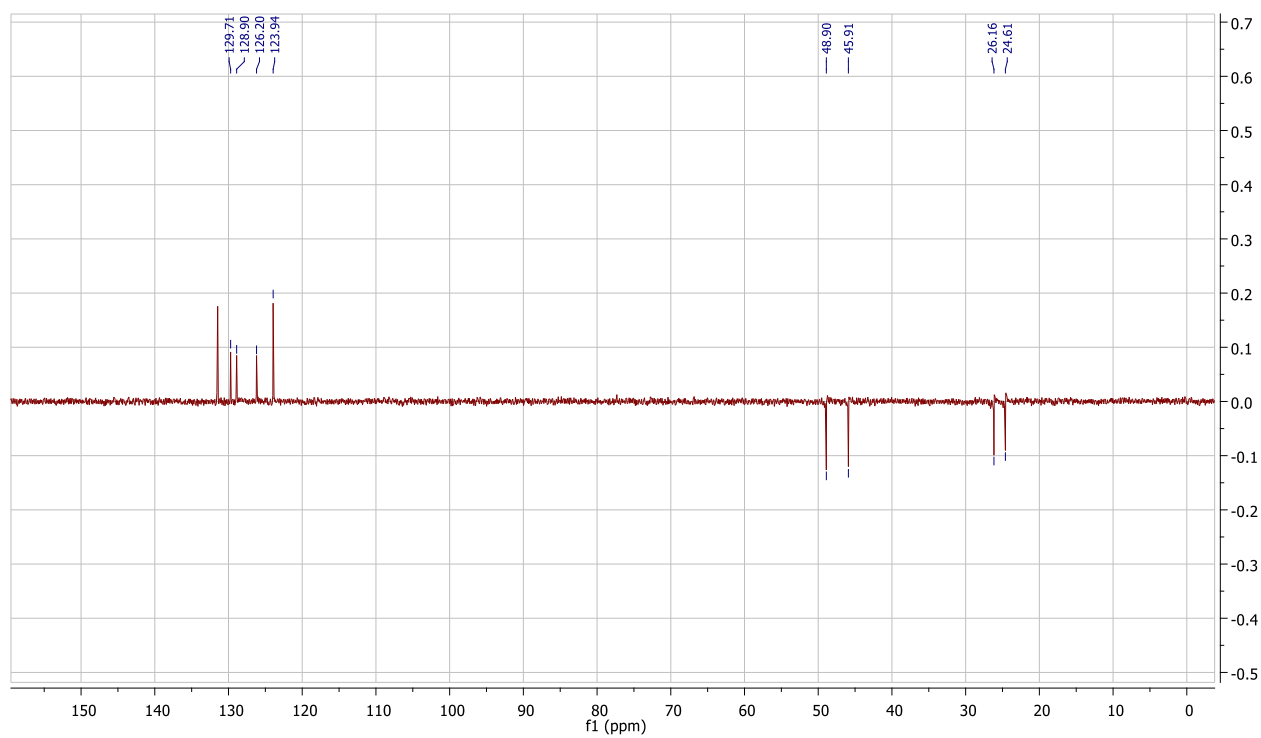

Spectral data of compound **3ia**.

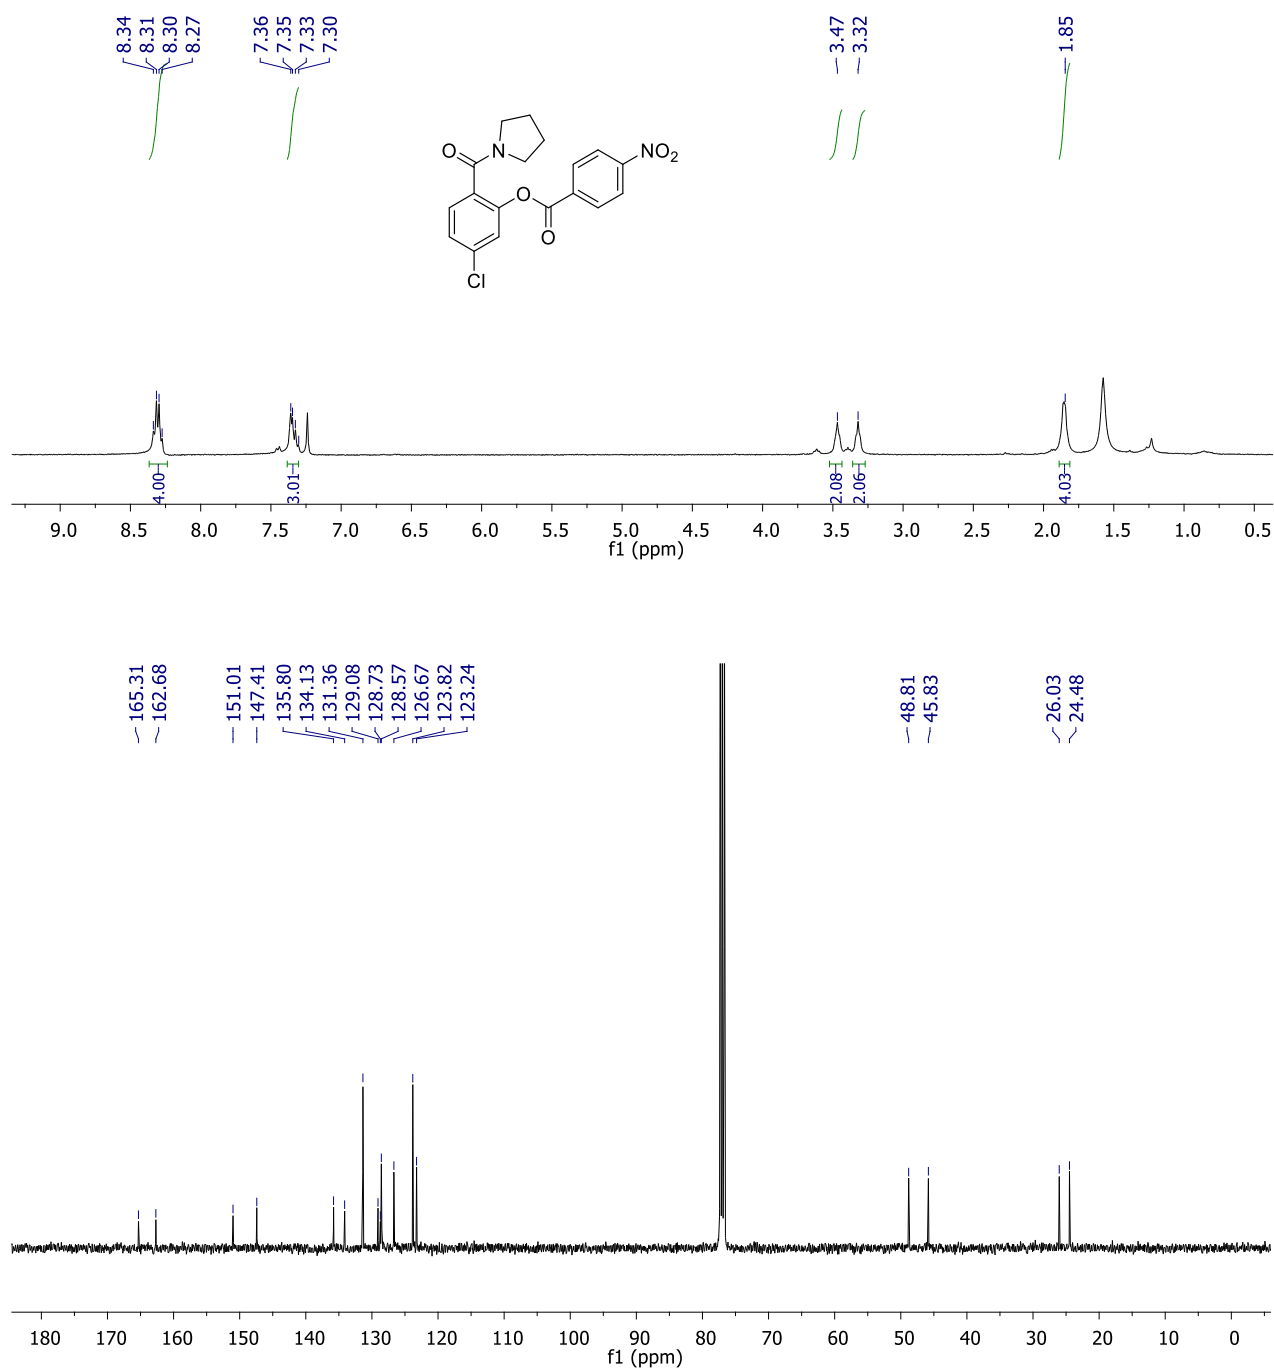

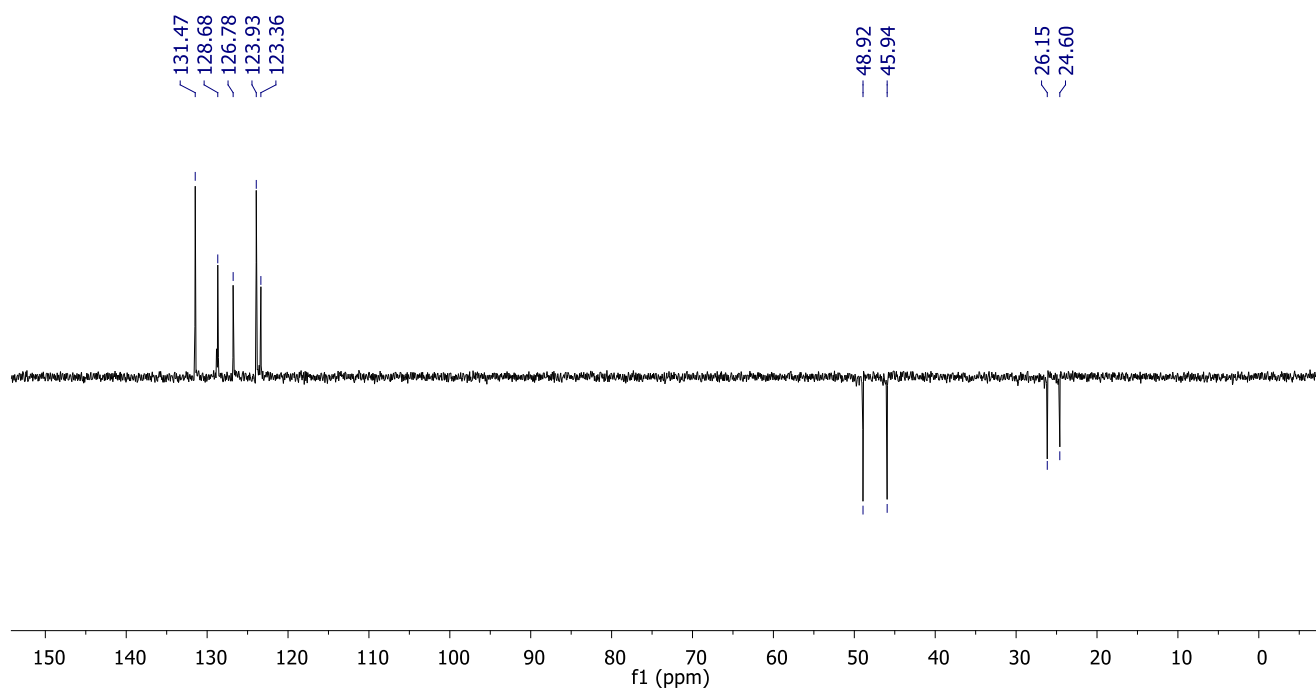

Spectral data of compound **3ja**.

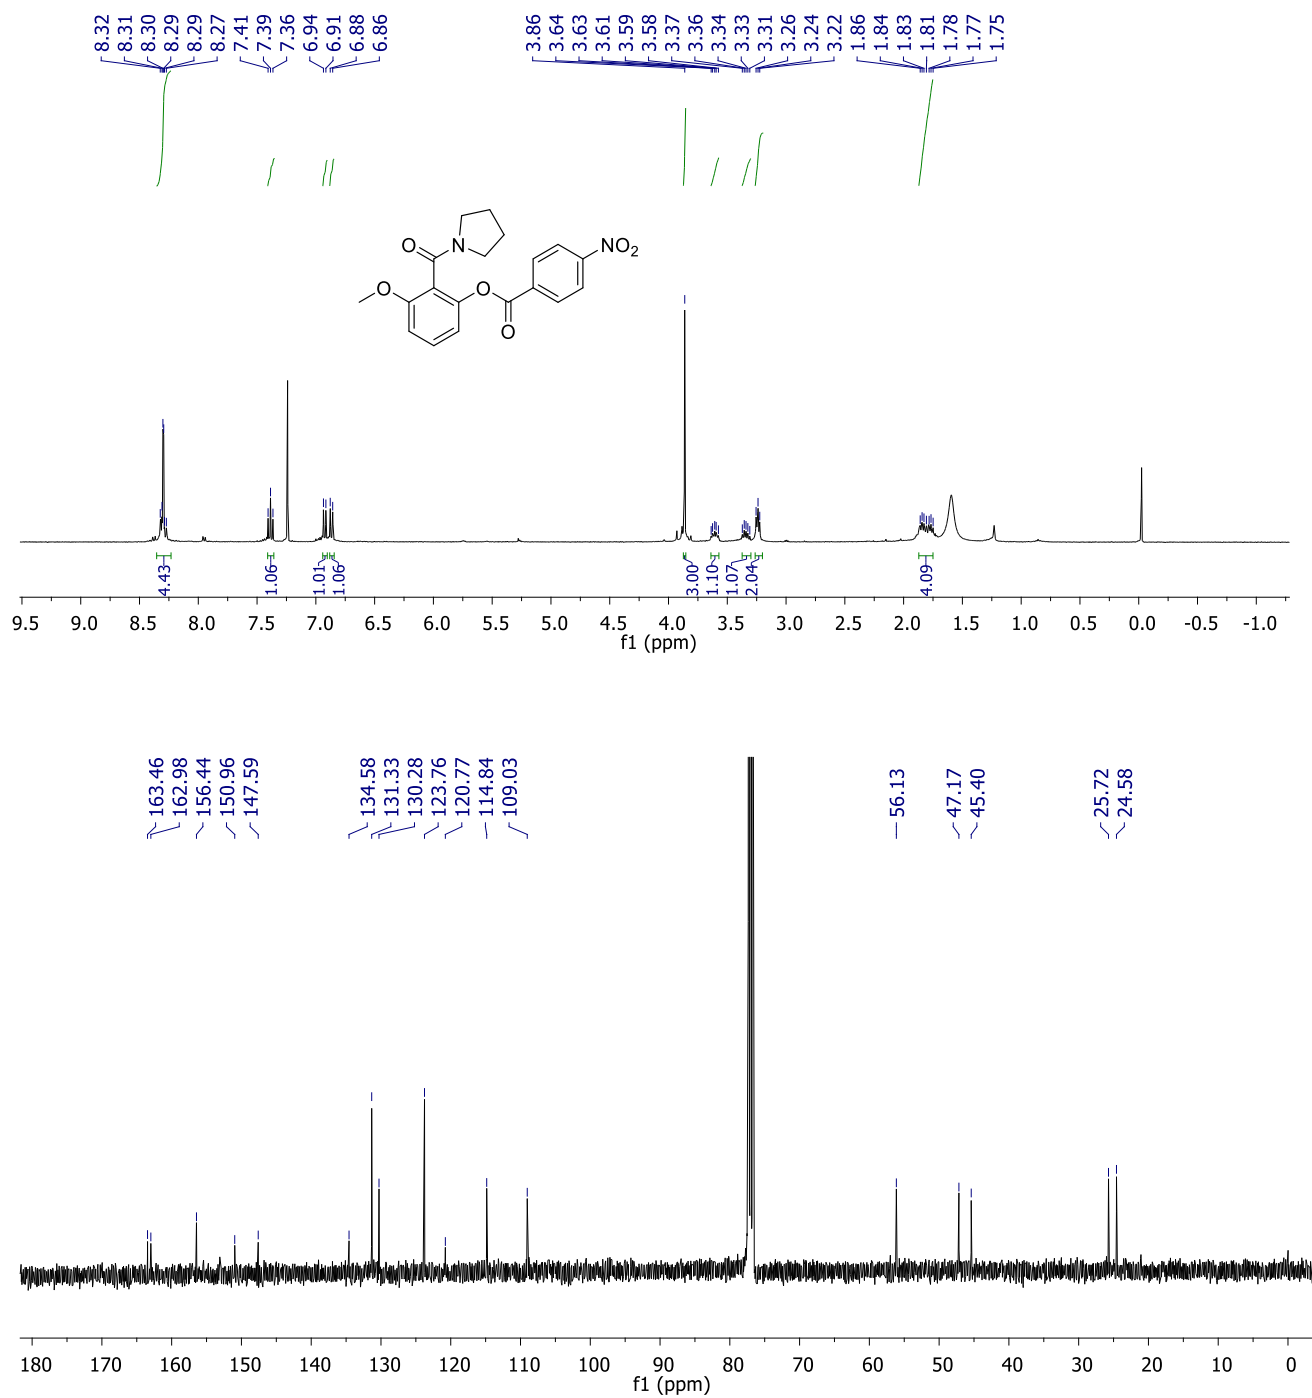

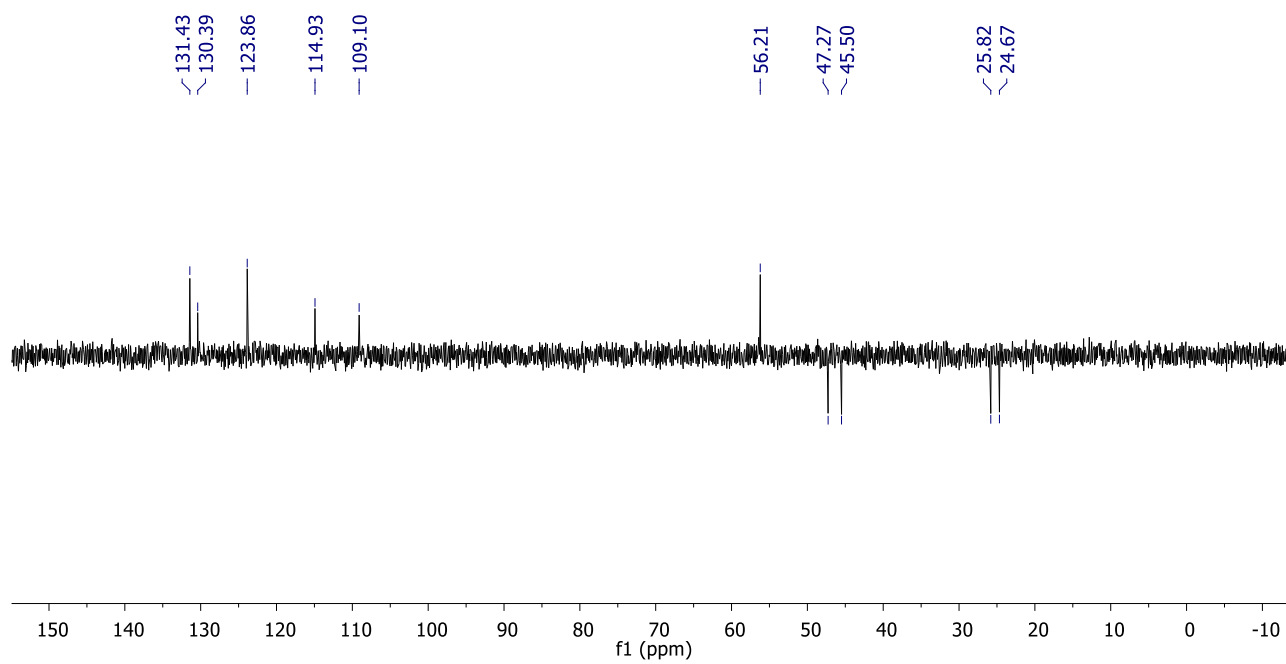

# Spectral data of compound **3ka**.

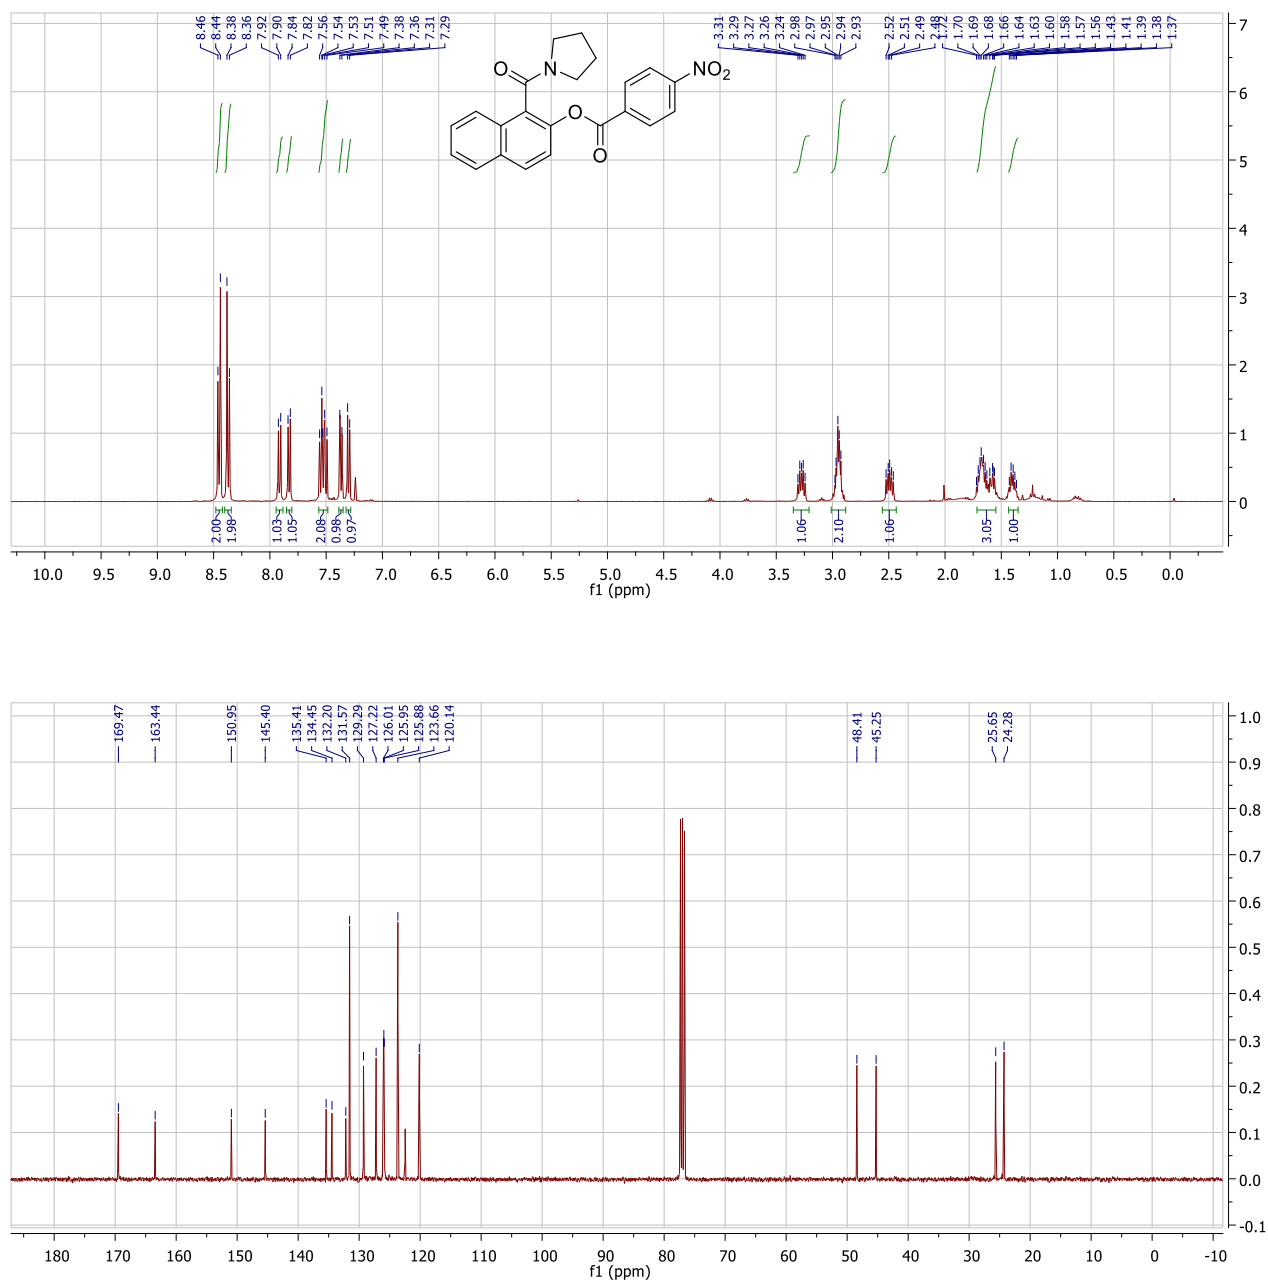

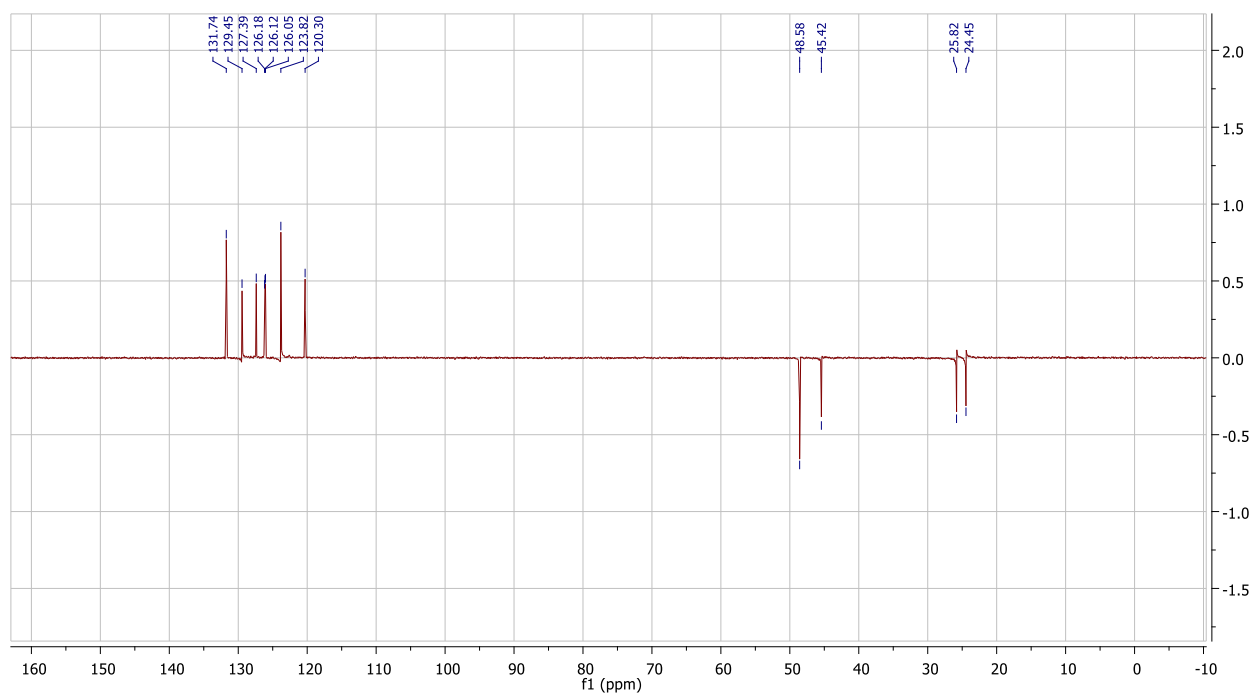

Spectral data of compound **3la**.

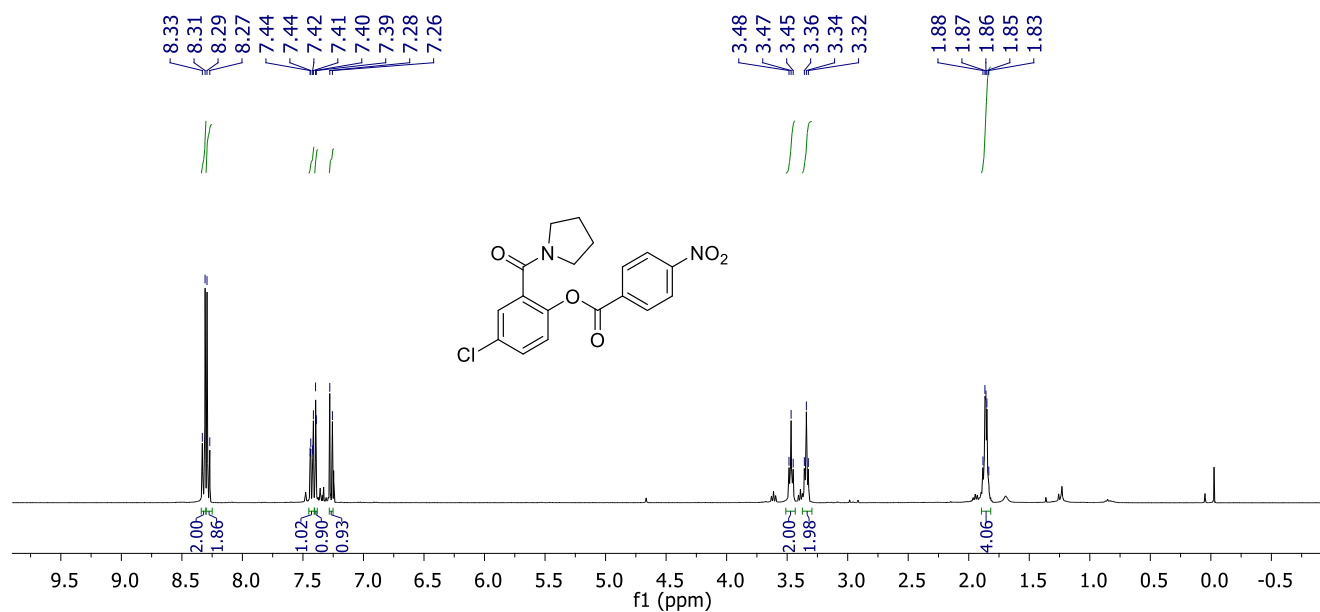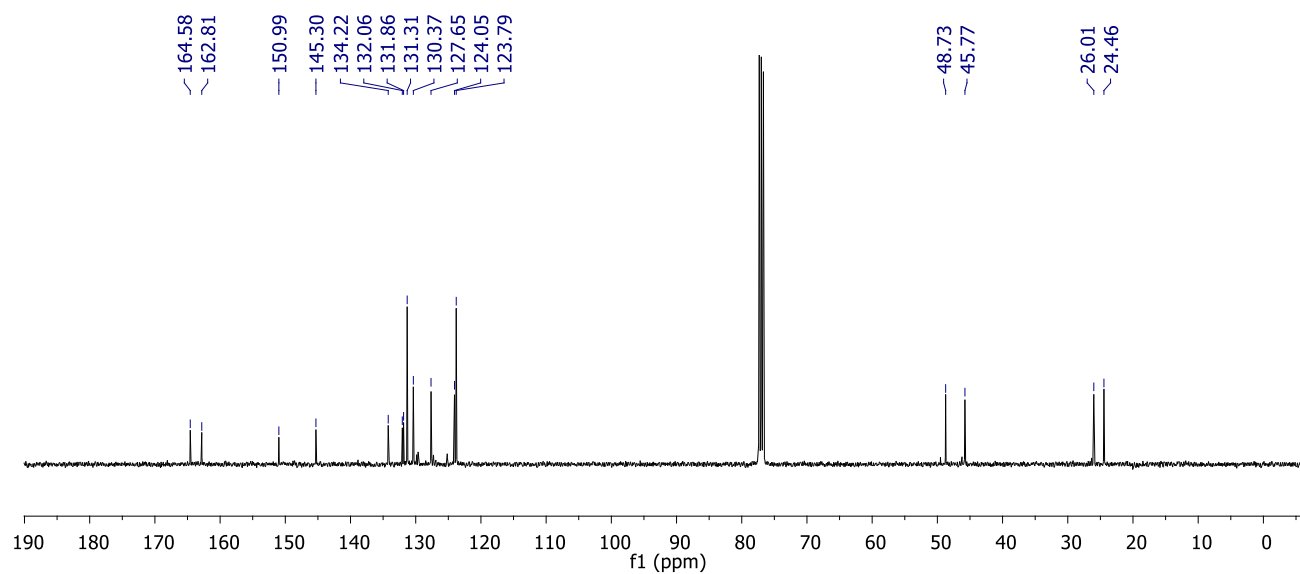



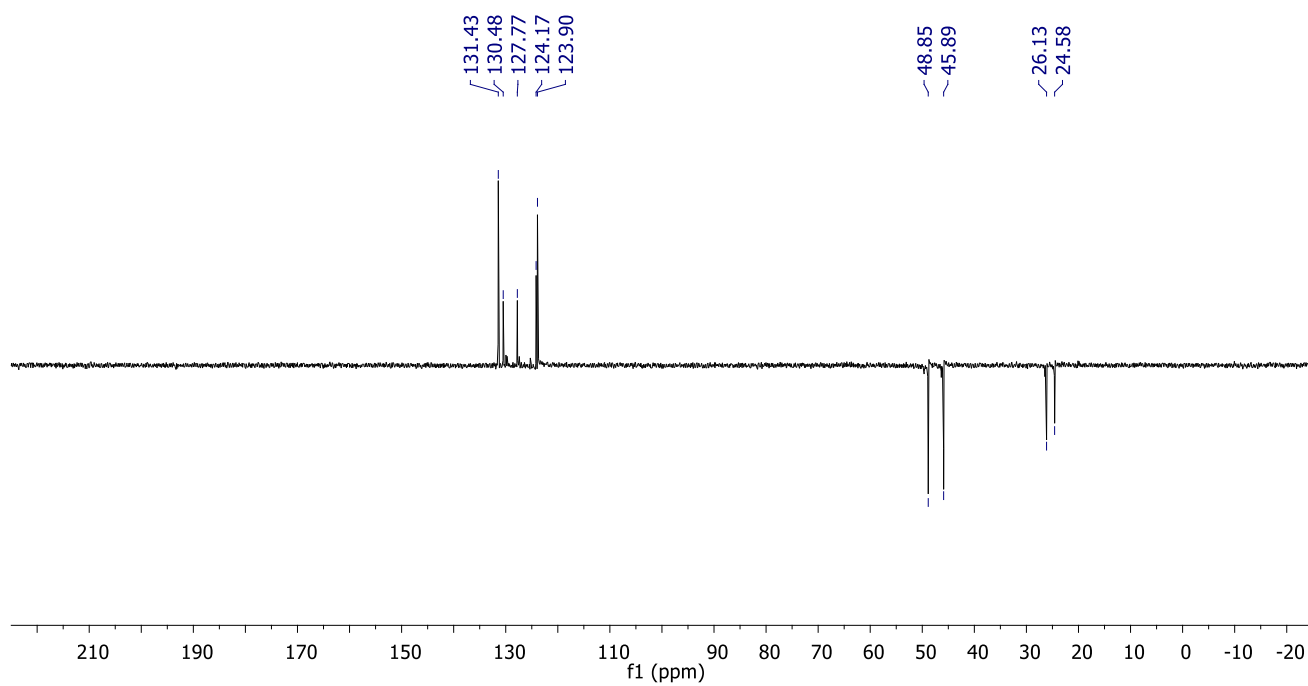

Spectral data of compound **3ma**.

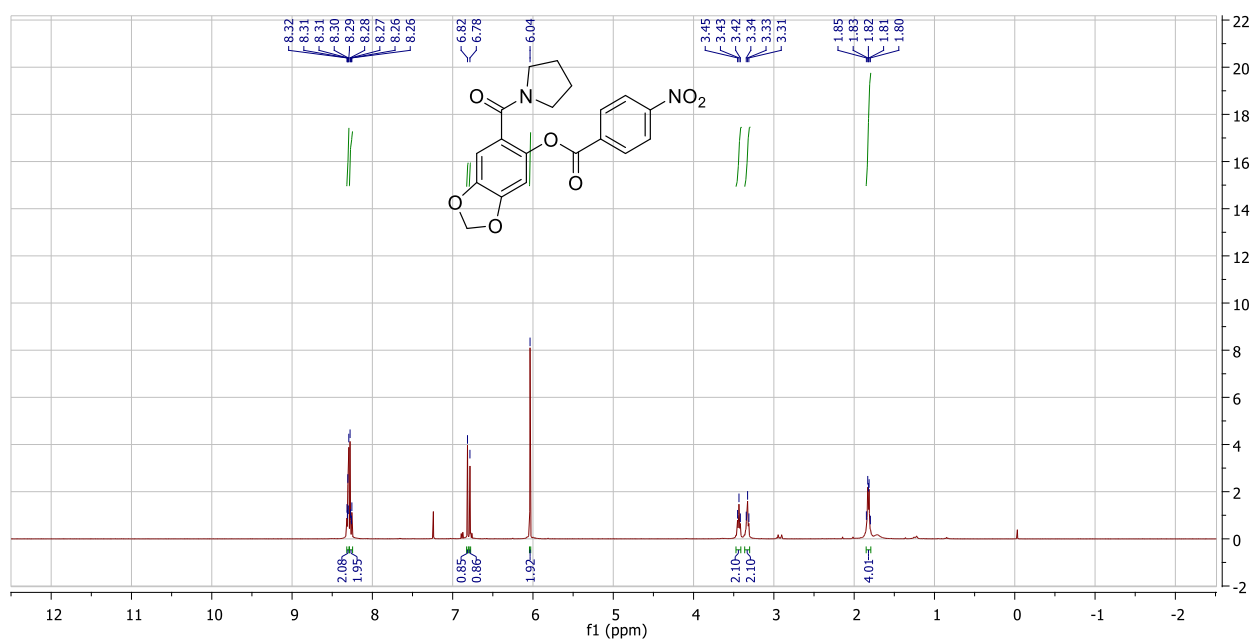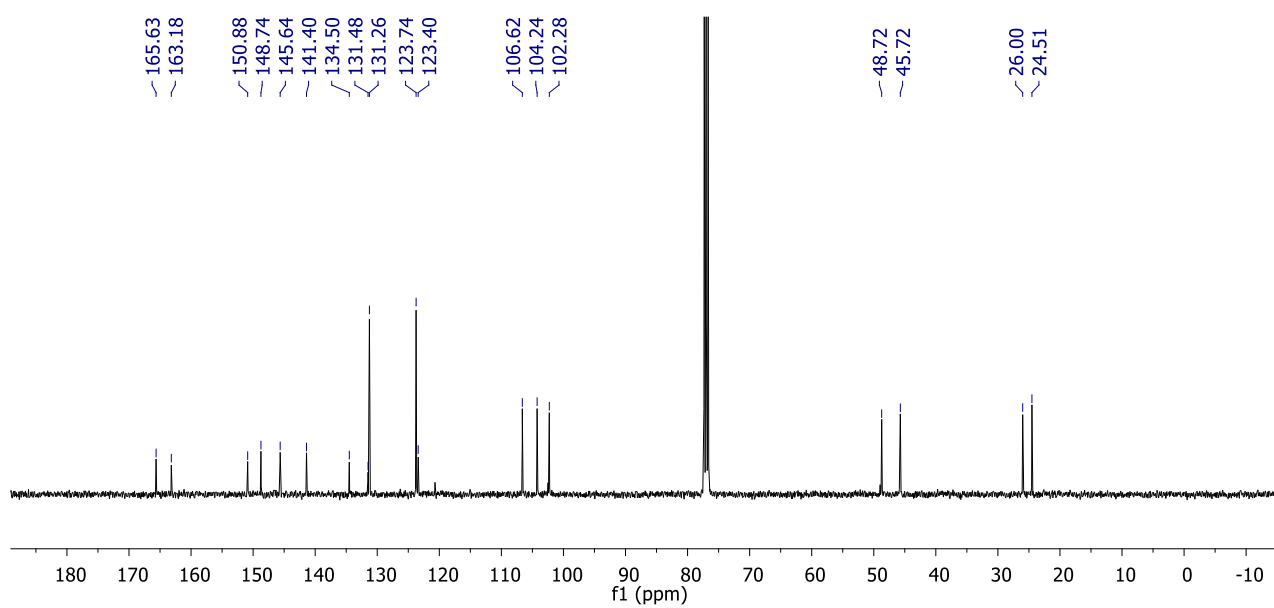

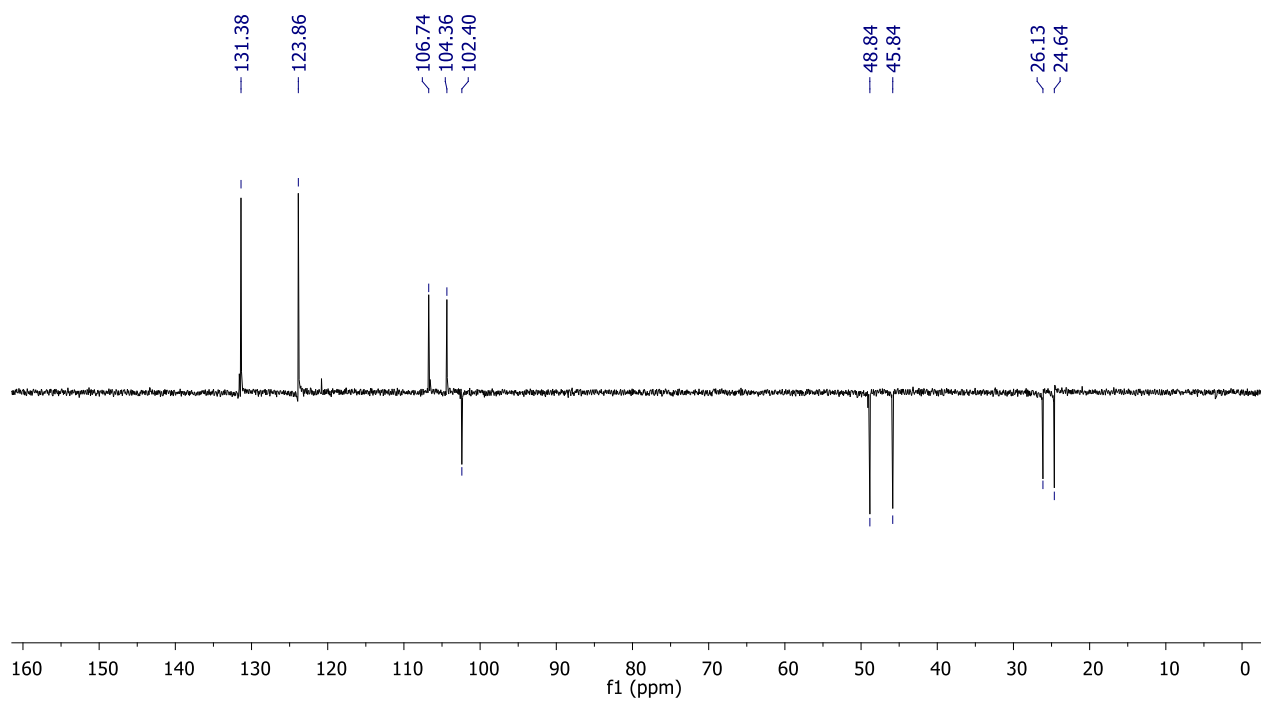

# Spectral data of compound **3na**.

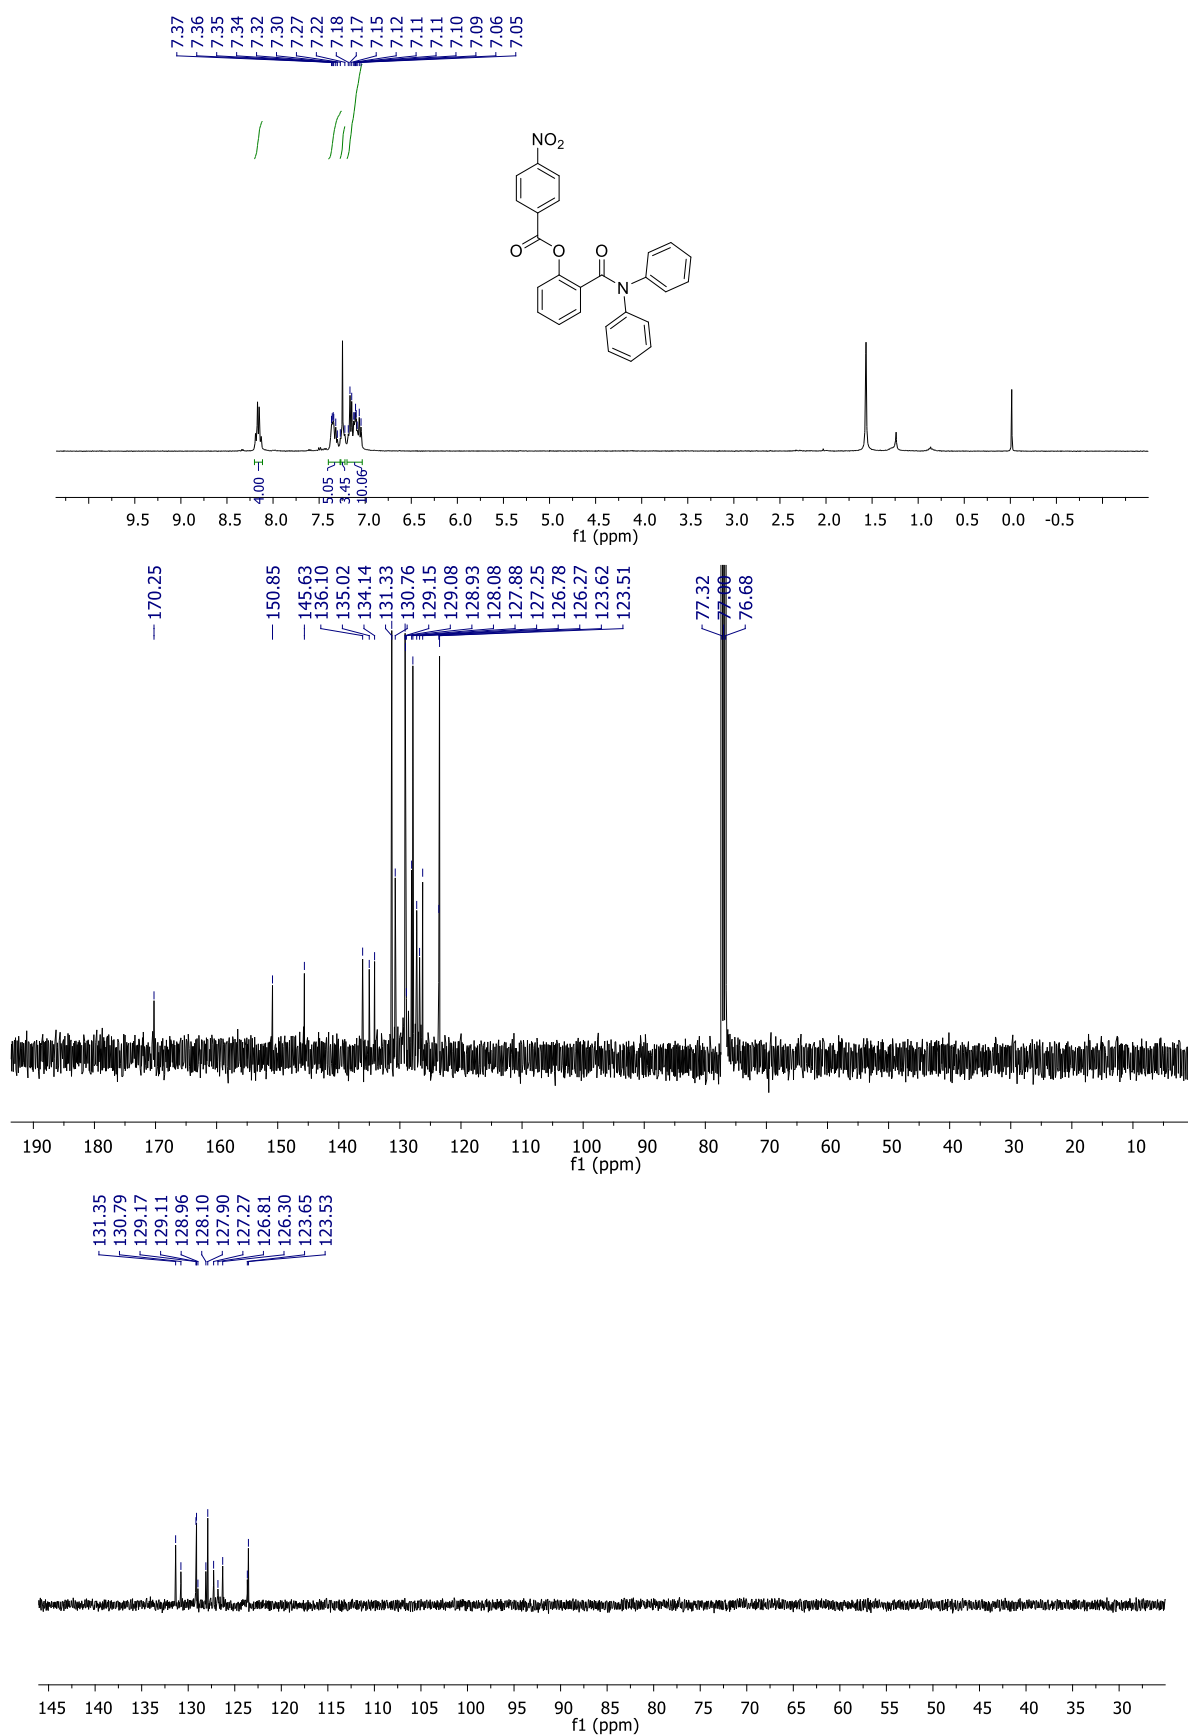

# Spectral data of compound **3na'**.

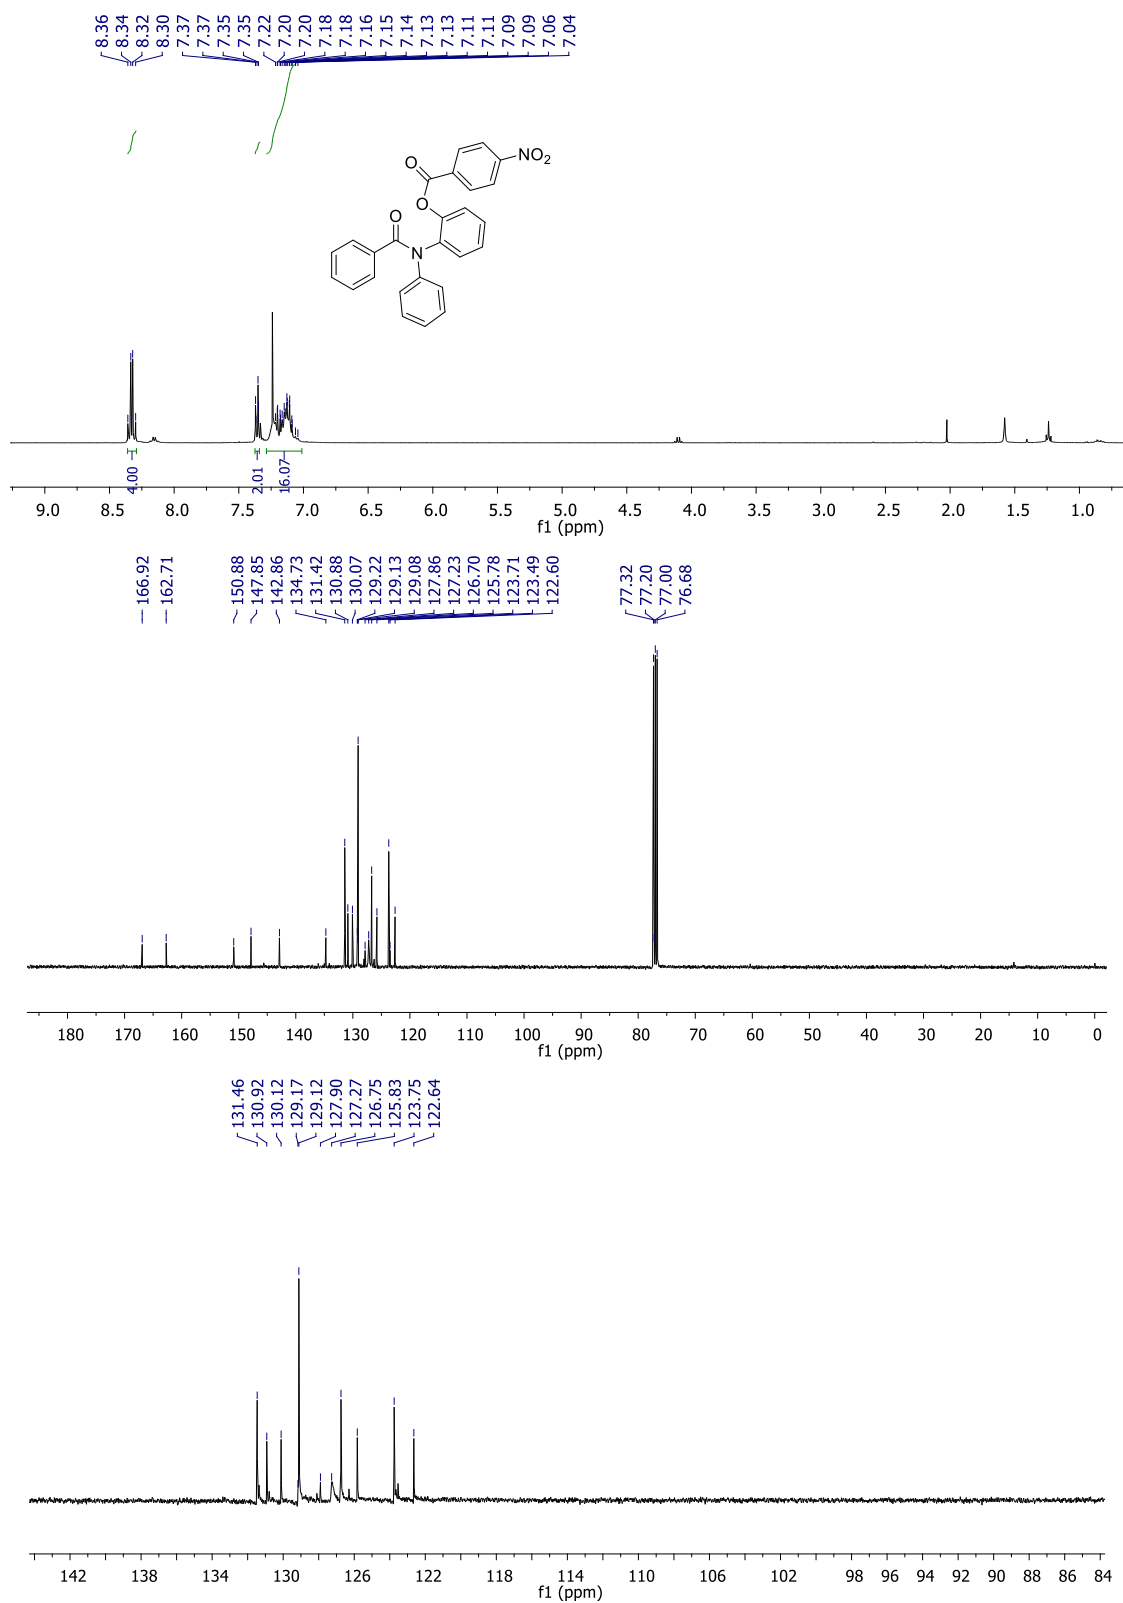

Spectral data of compound **3ab**.

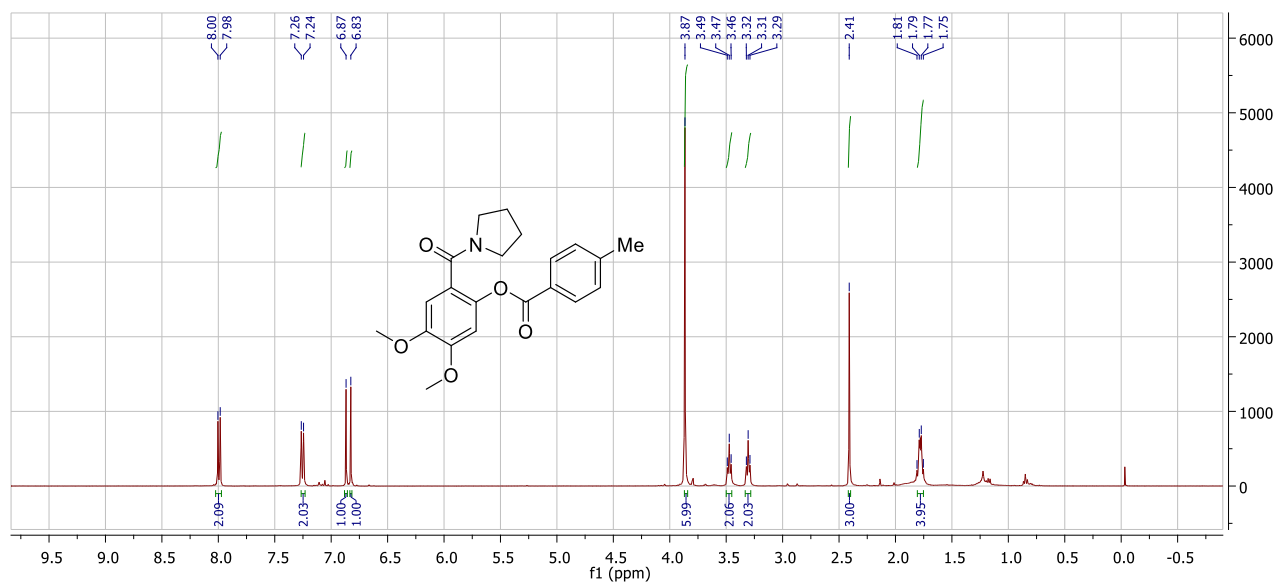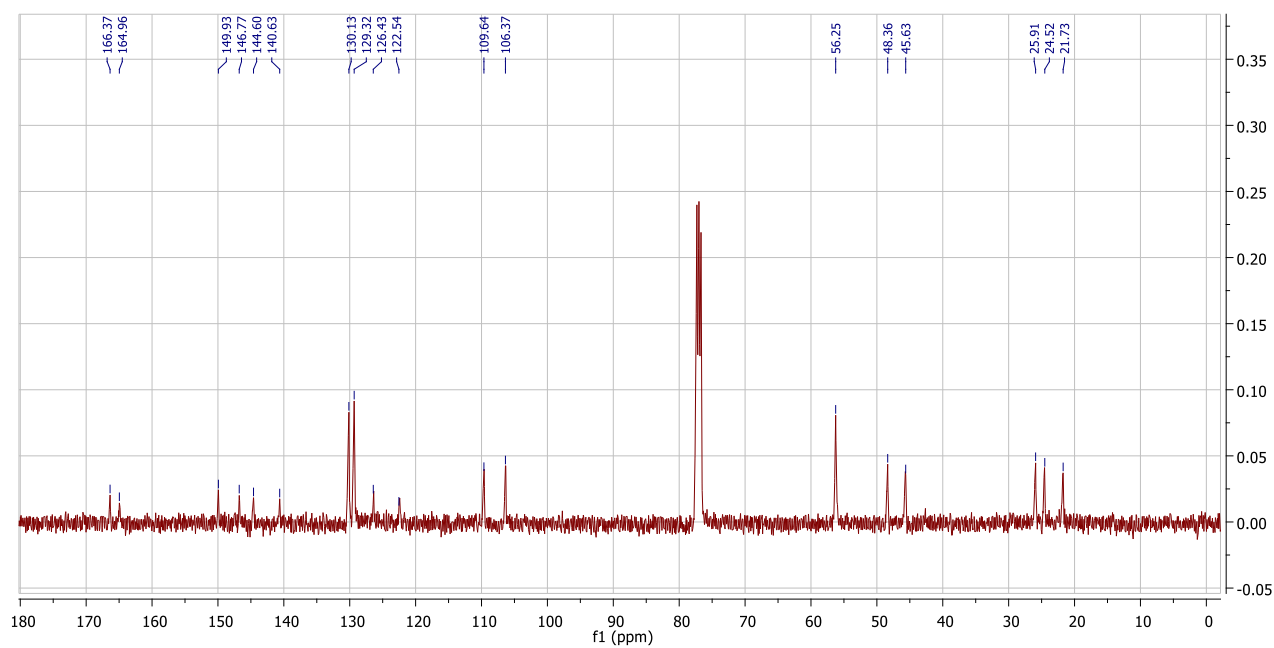

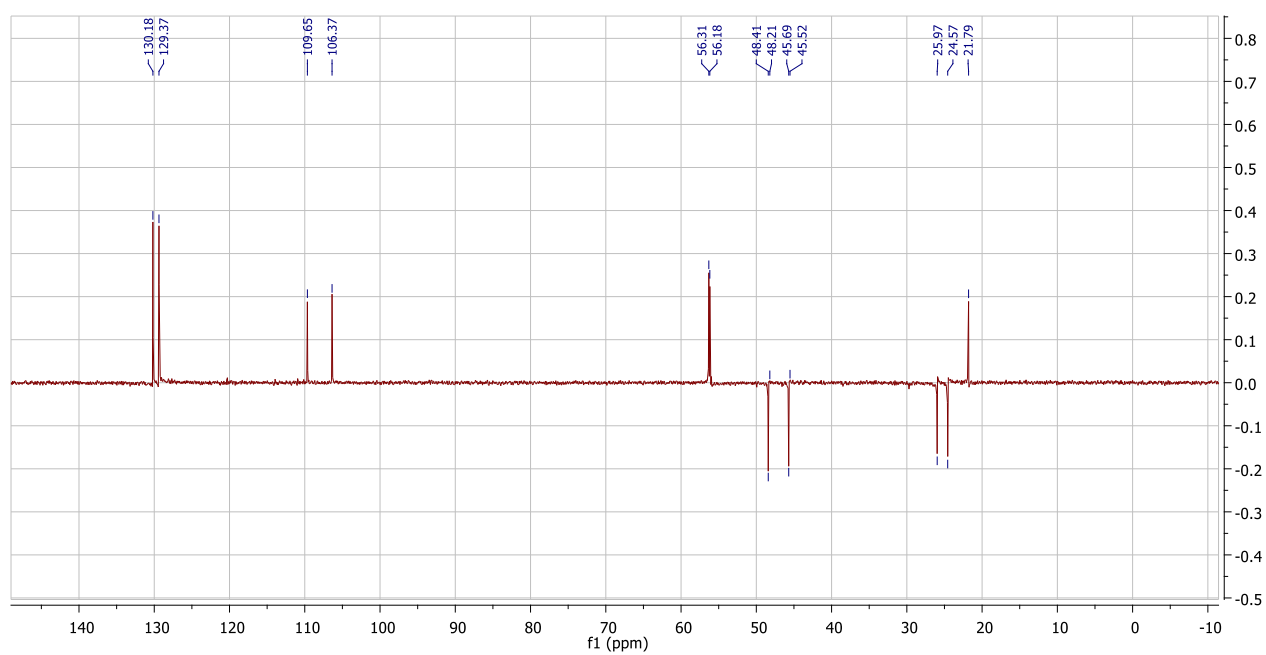

Spectral data of compound **3ac**.

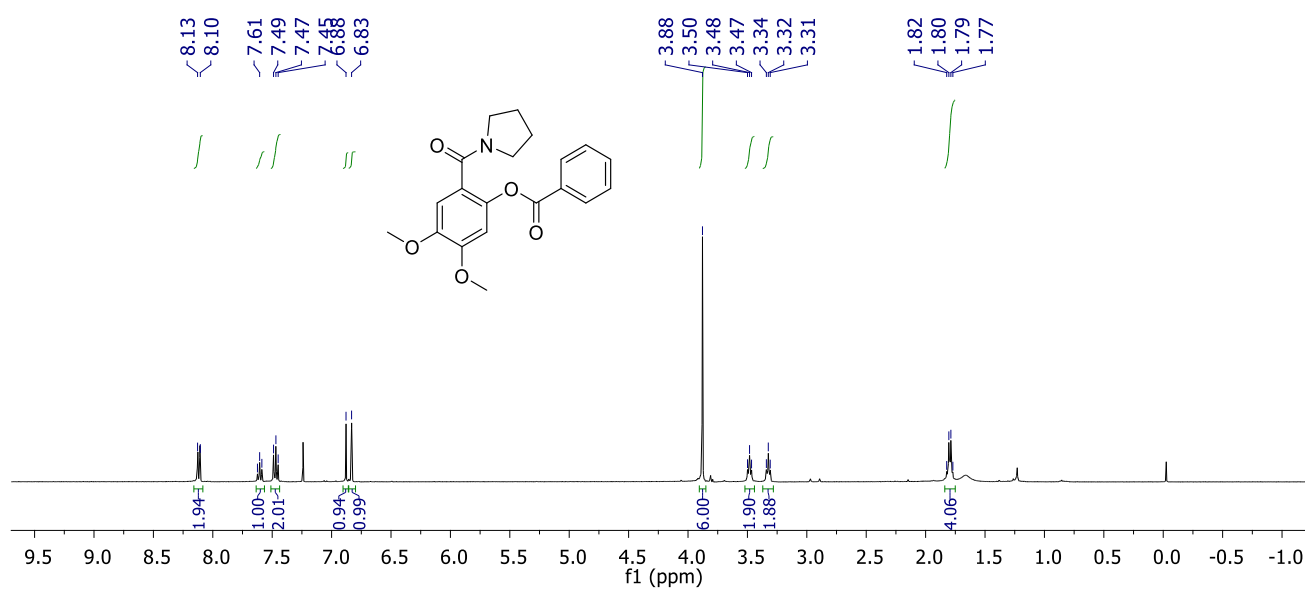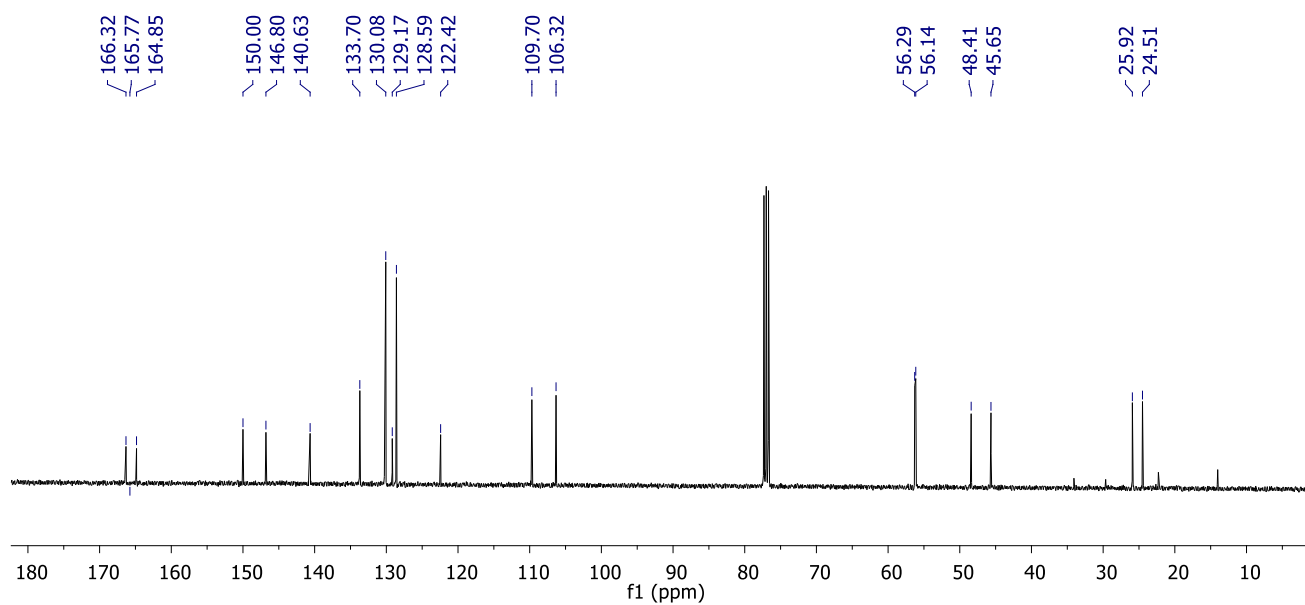



Spectral data of compound **3ad**.

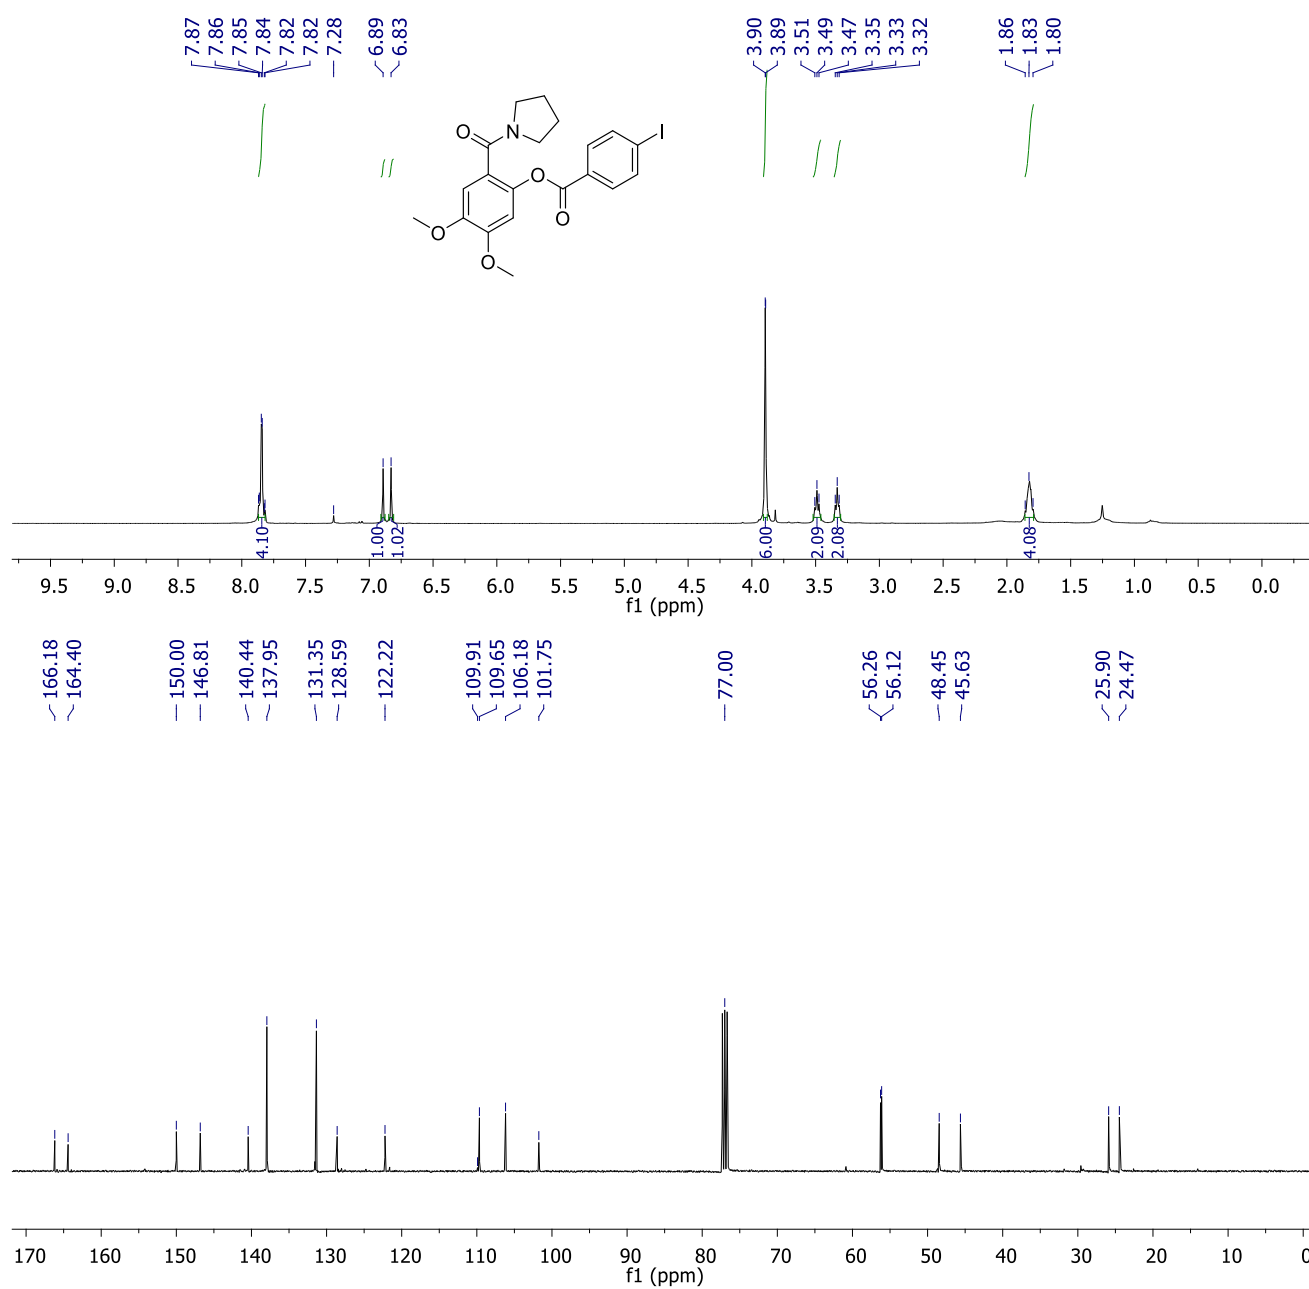

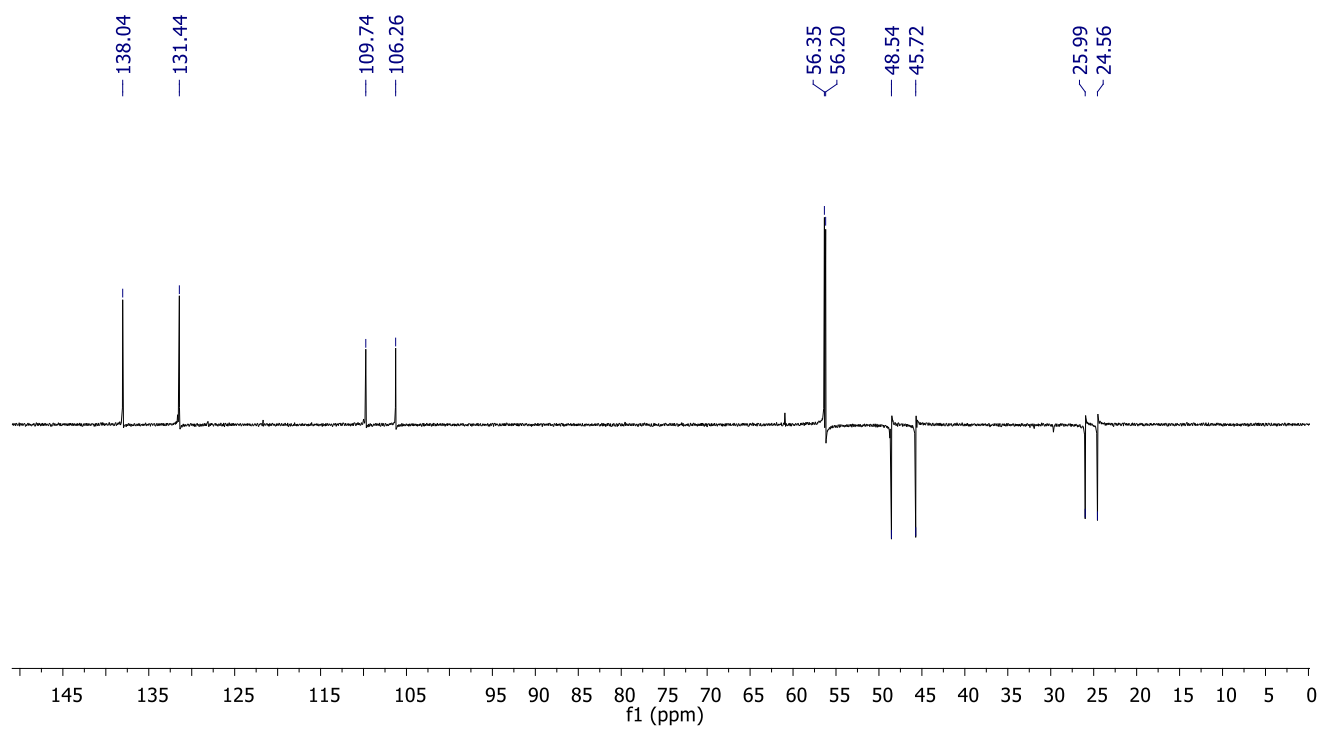

Spectral data of compound **3ae**.

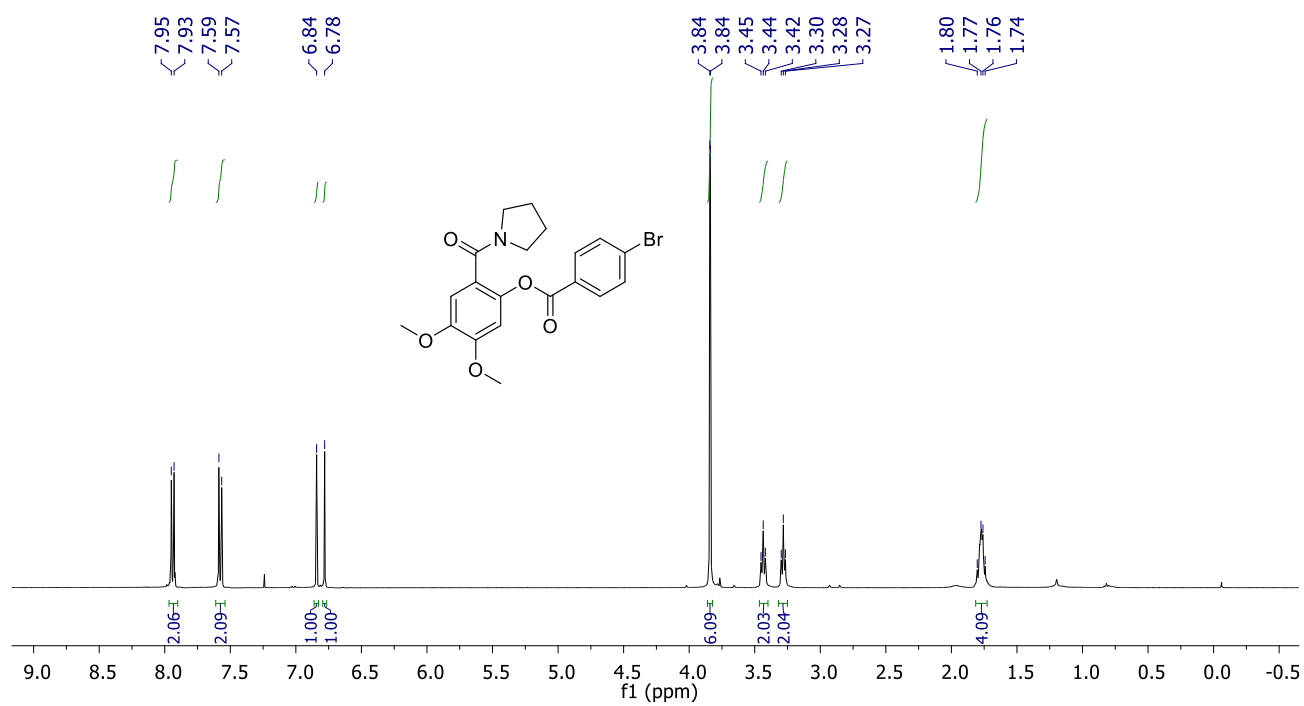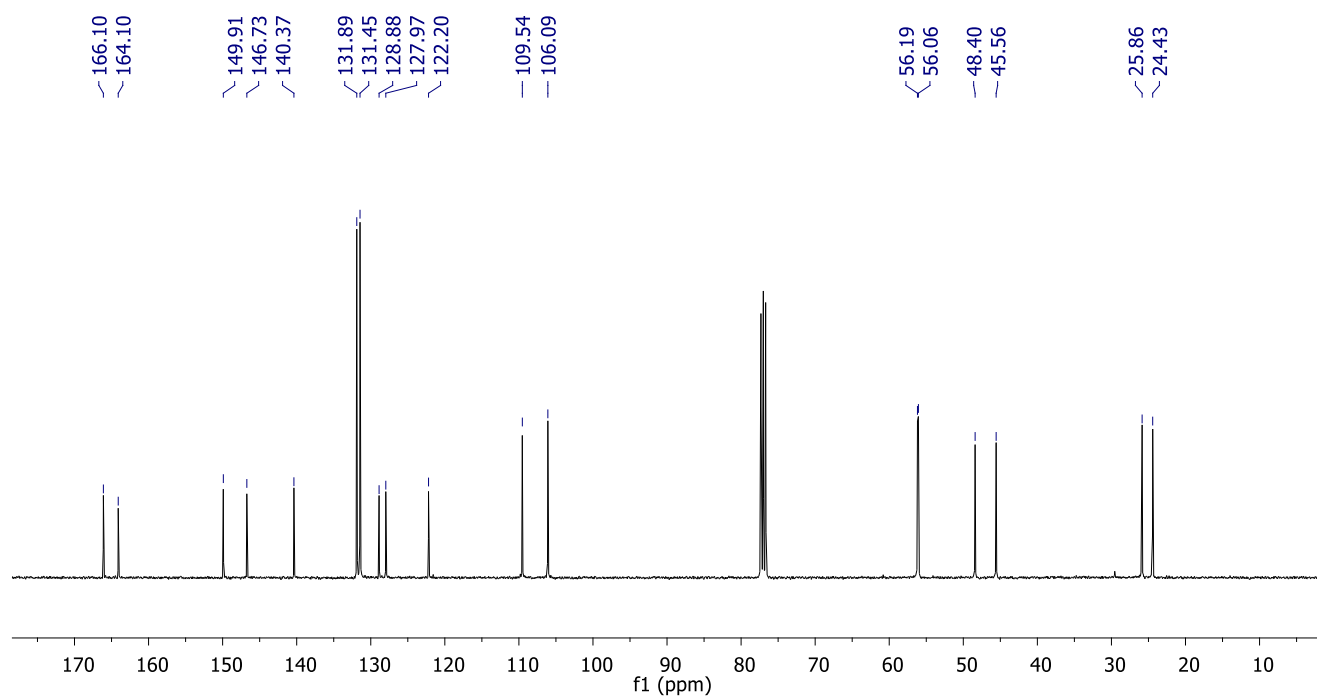

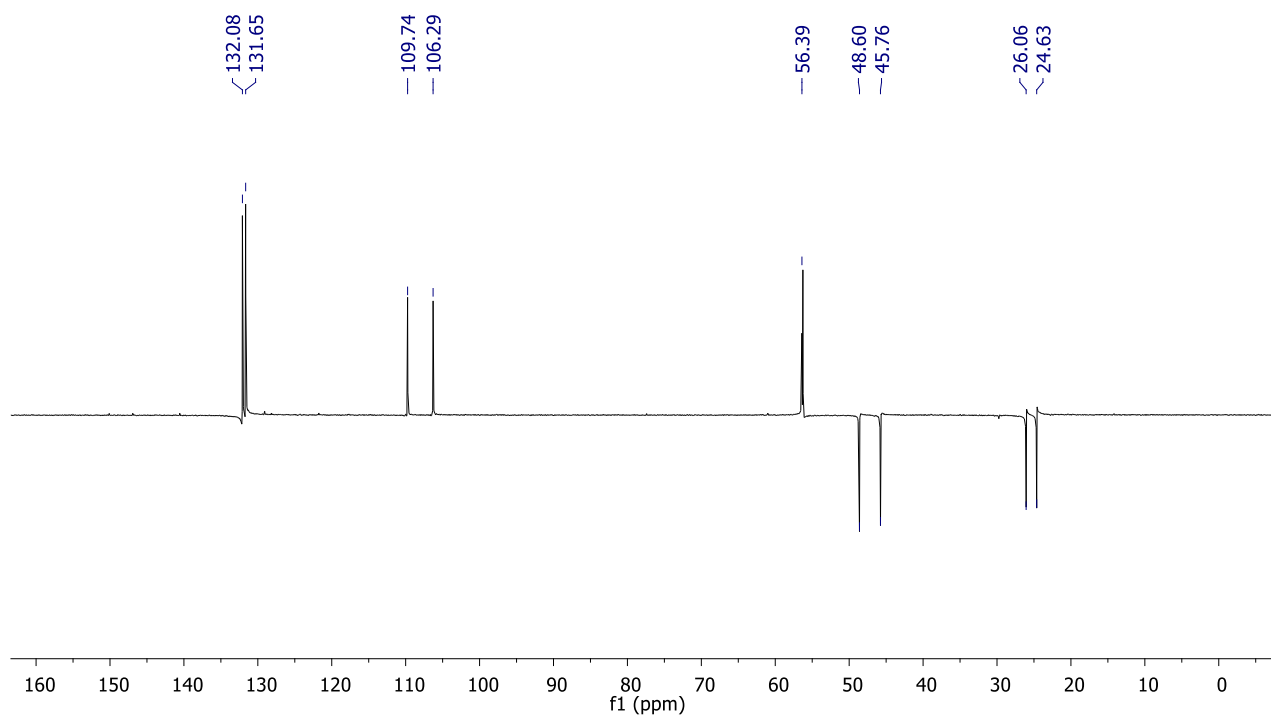

Spectral data of compound **3af**.

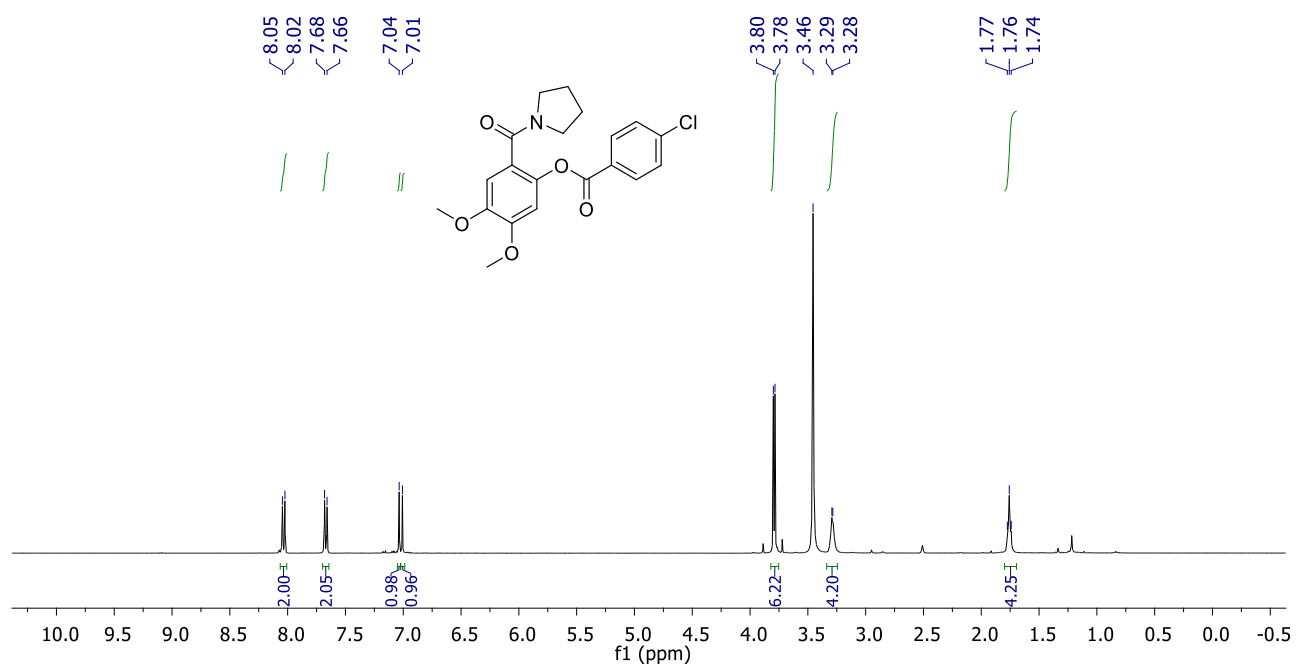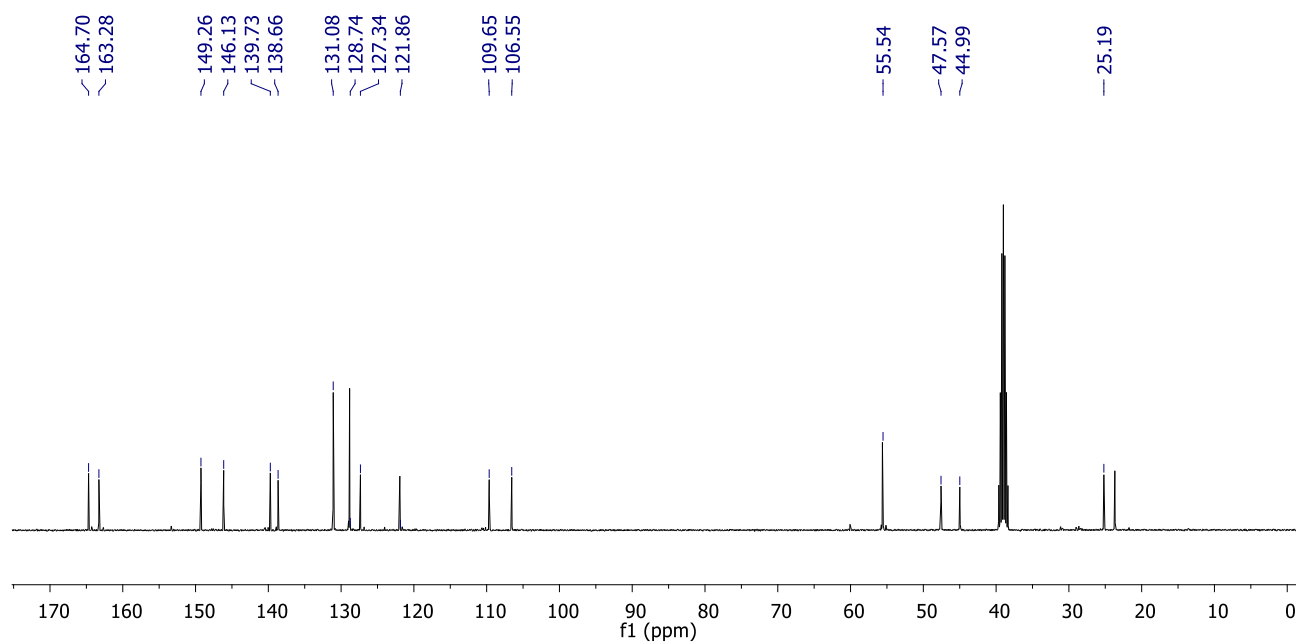

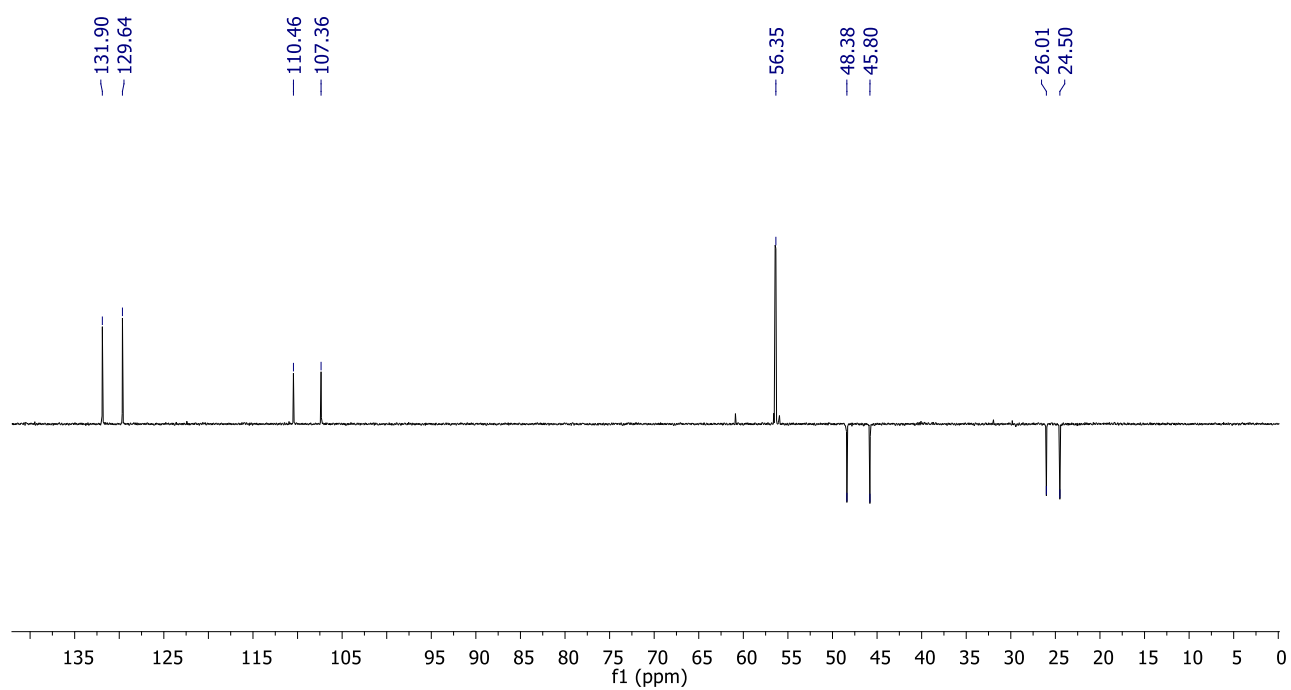

Spectral data of compound **3ag**.

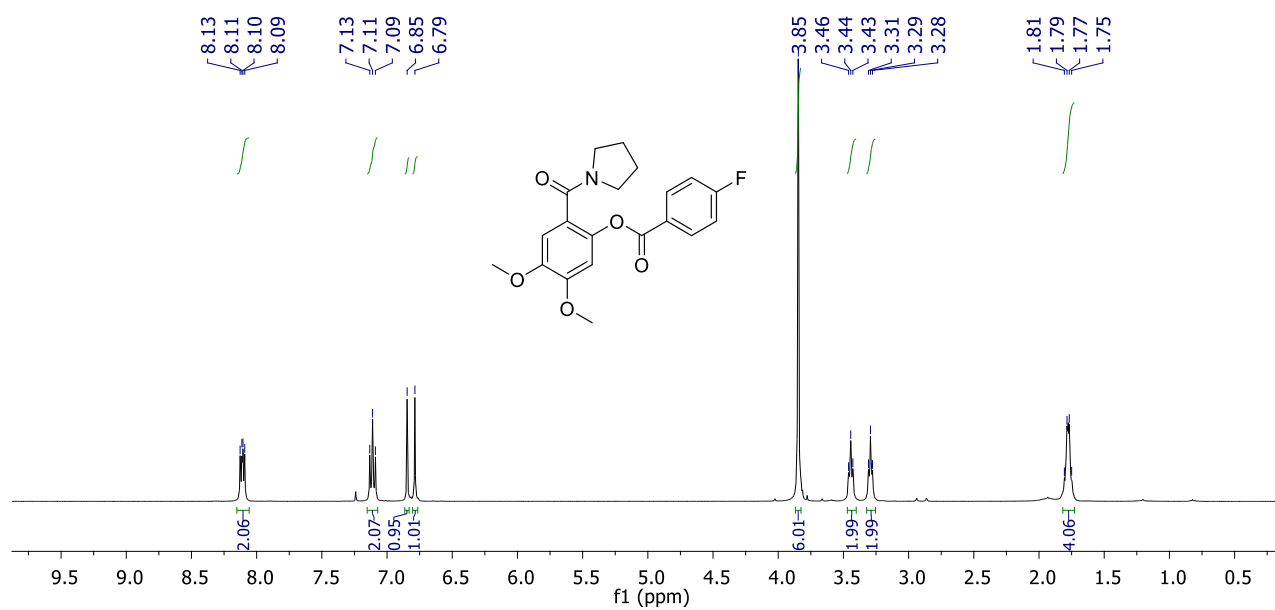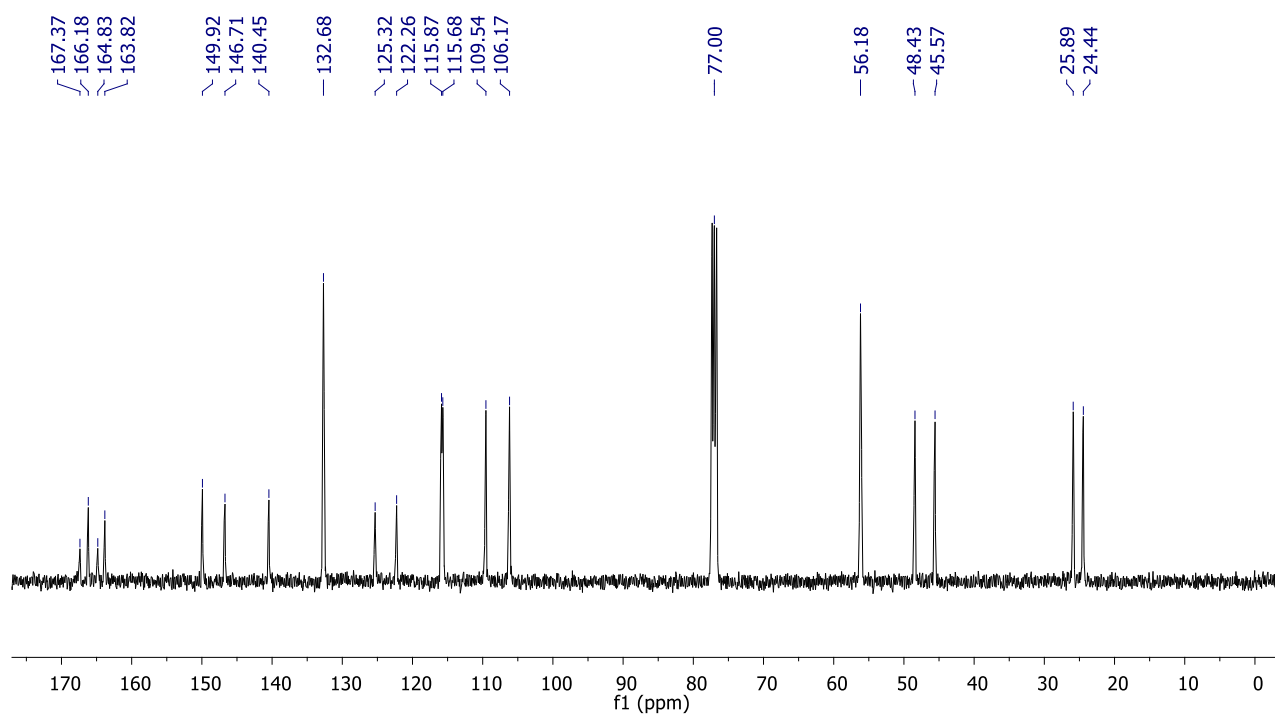

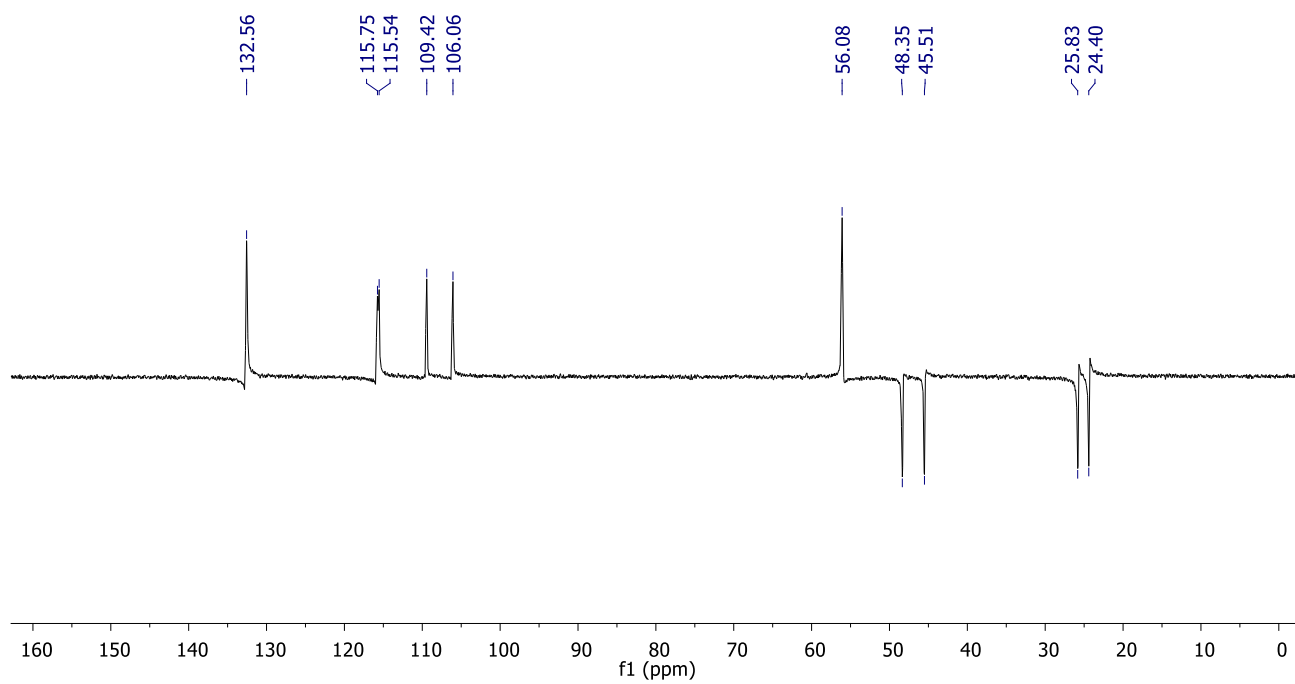



Spectral data of compound **3ah**.

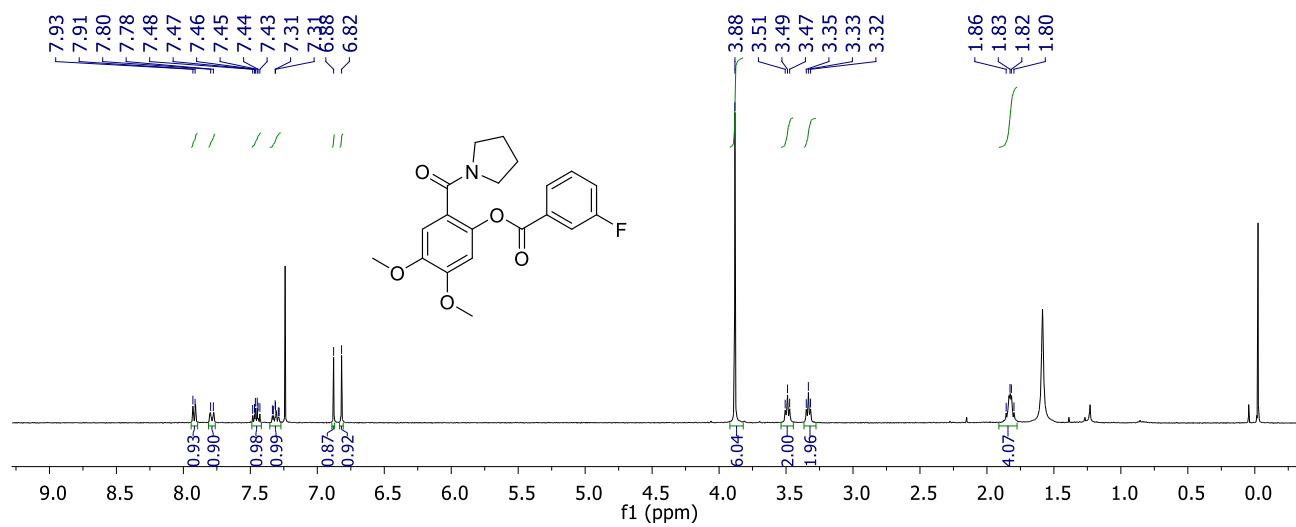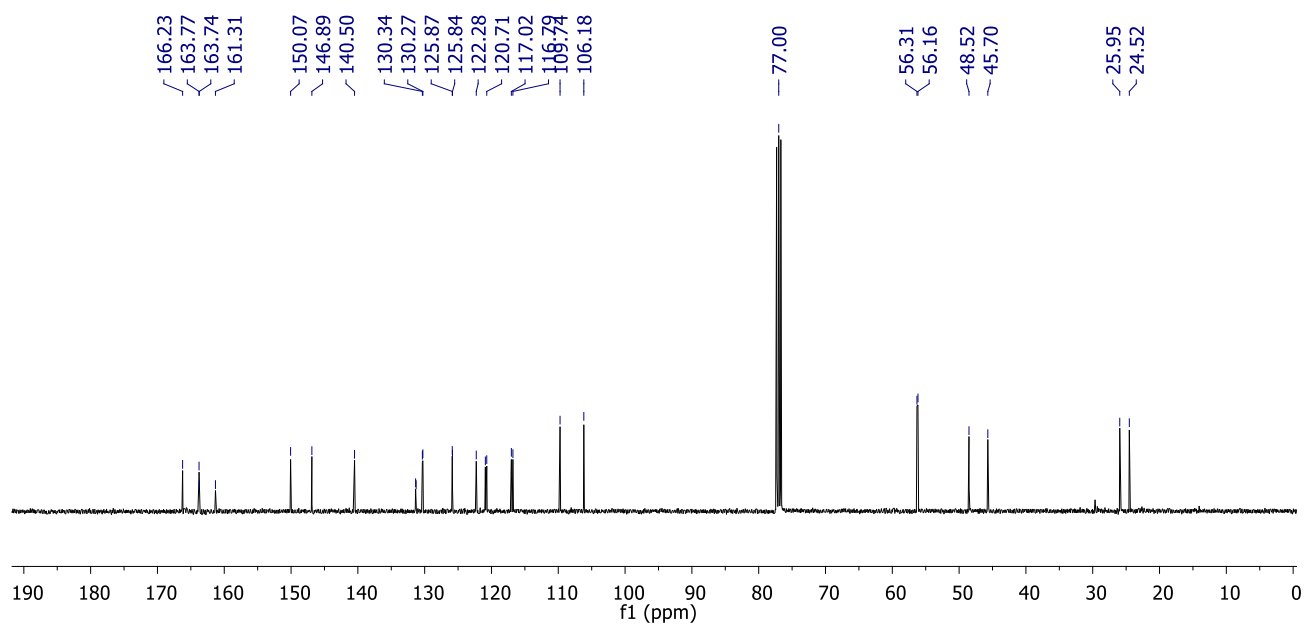

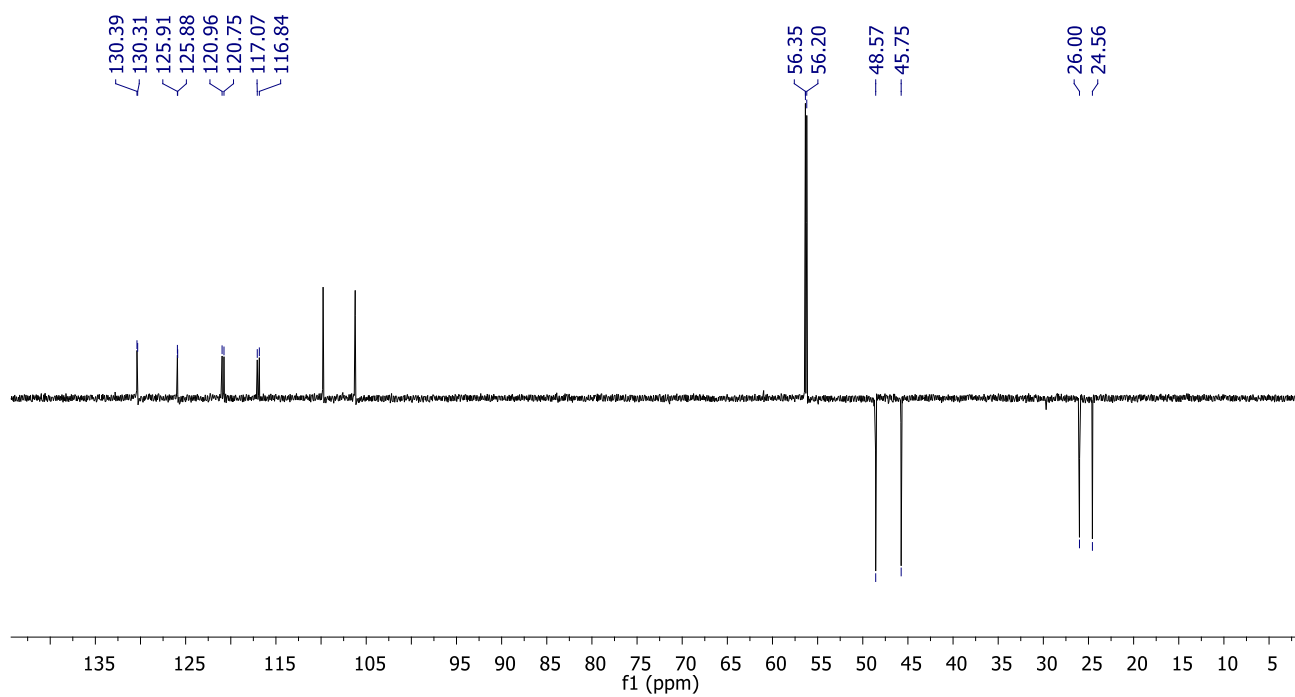

Spectral data of compound **3ai**.

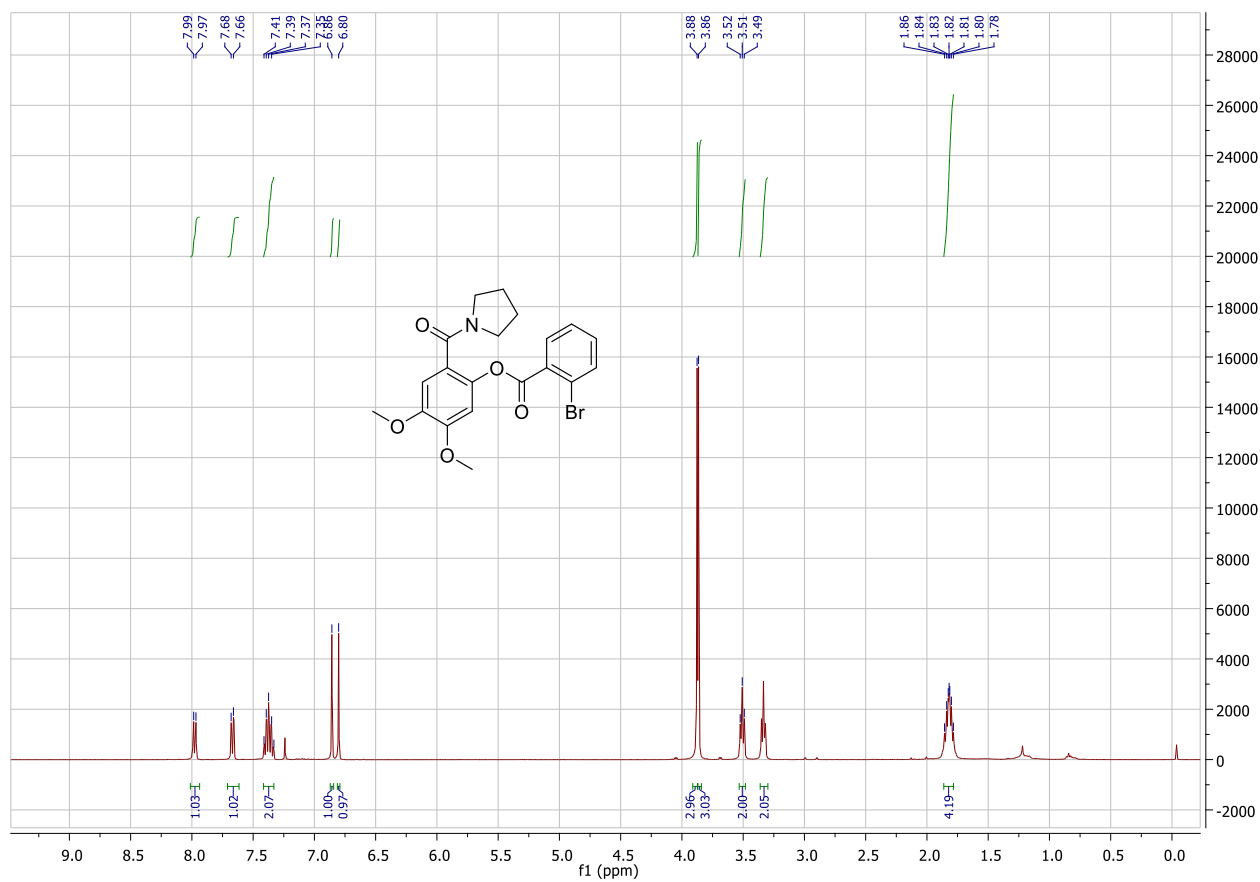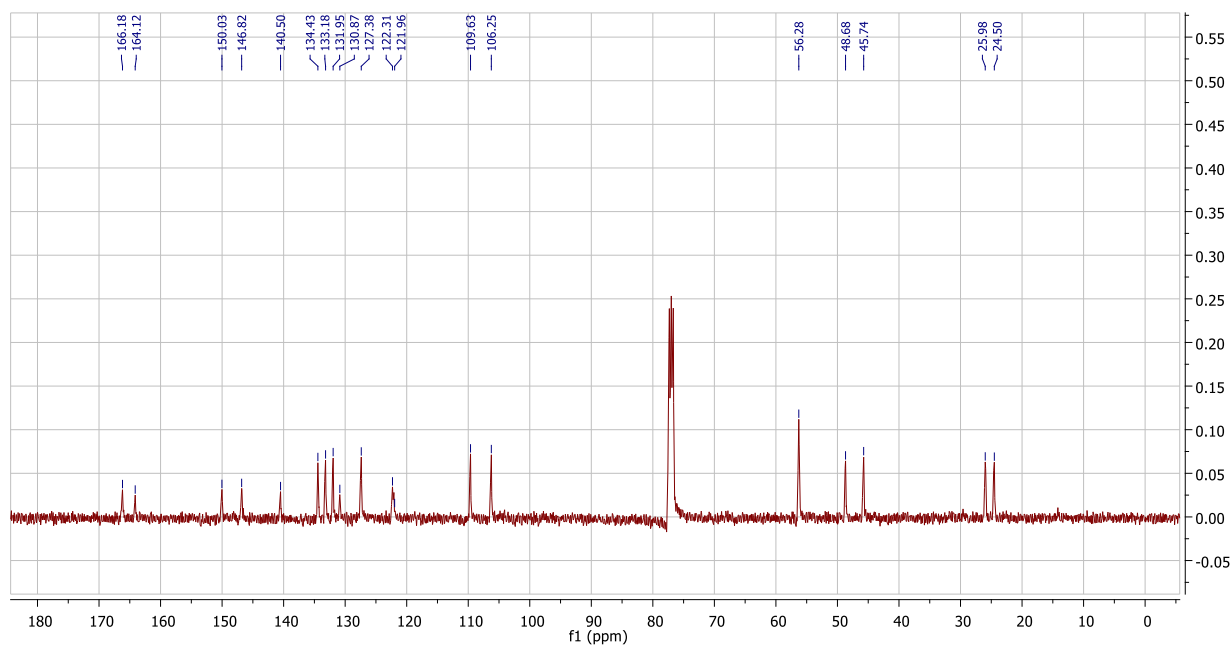

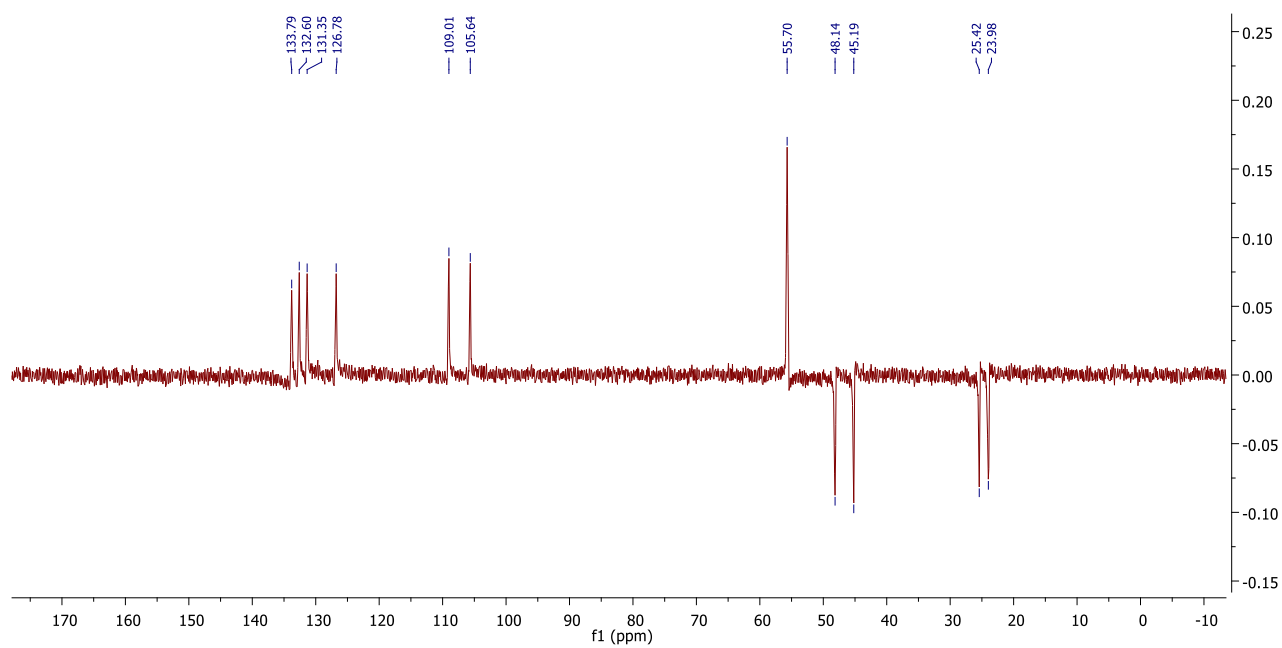

Spectral data of compound **3aj**.

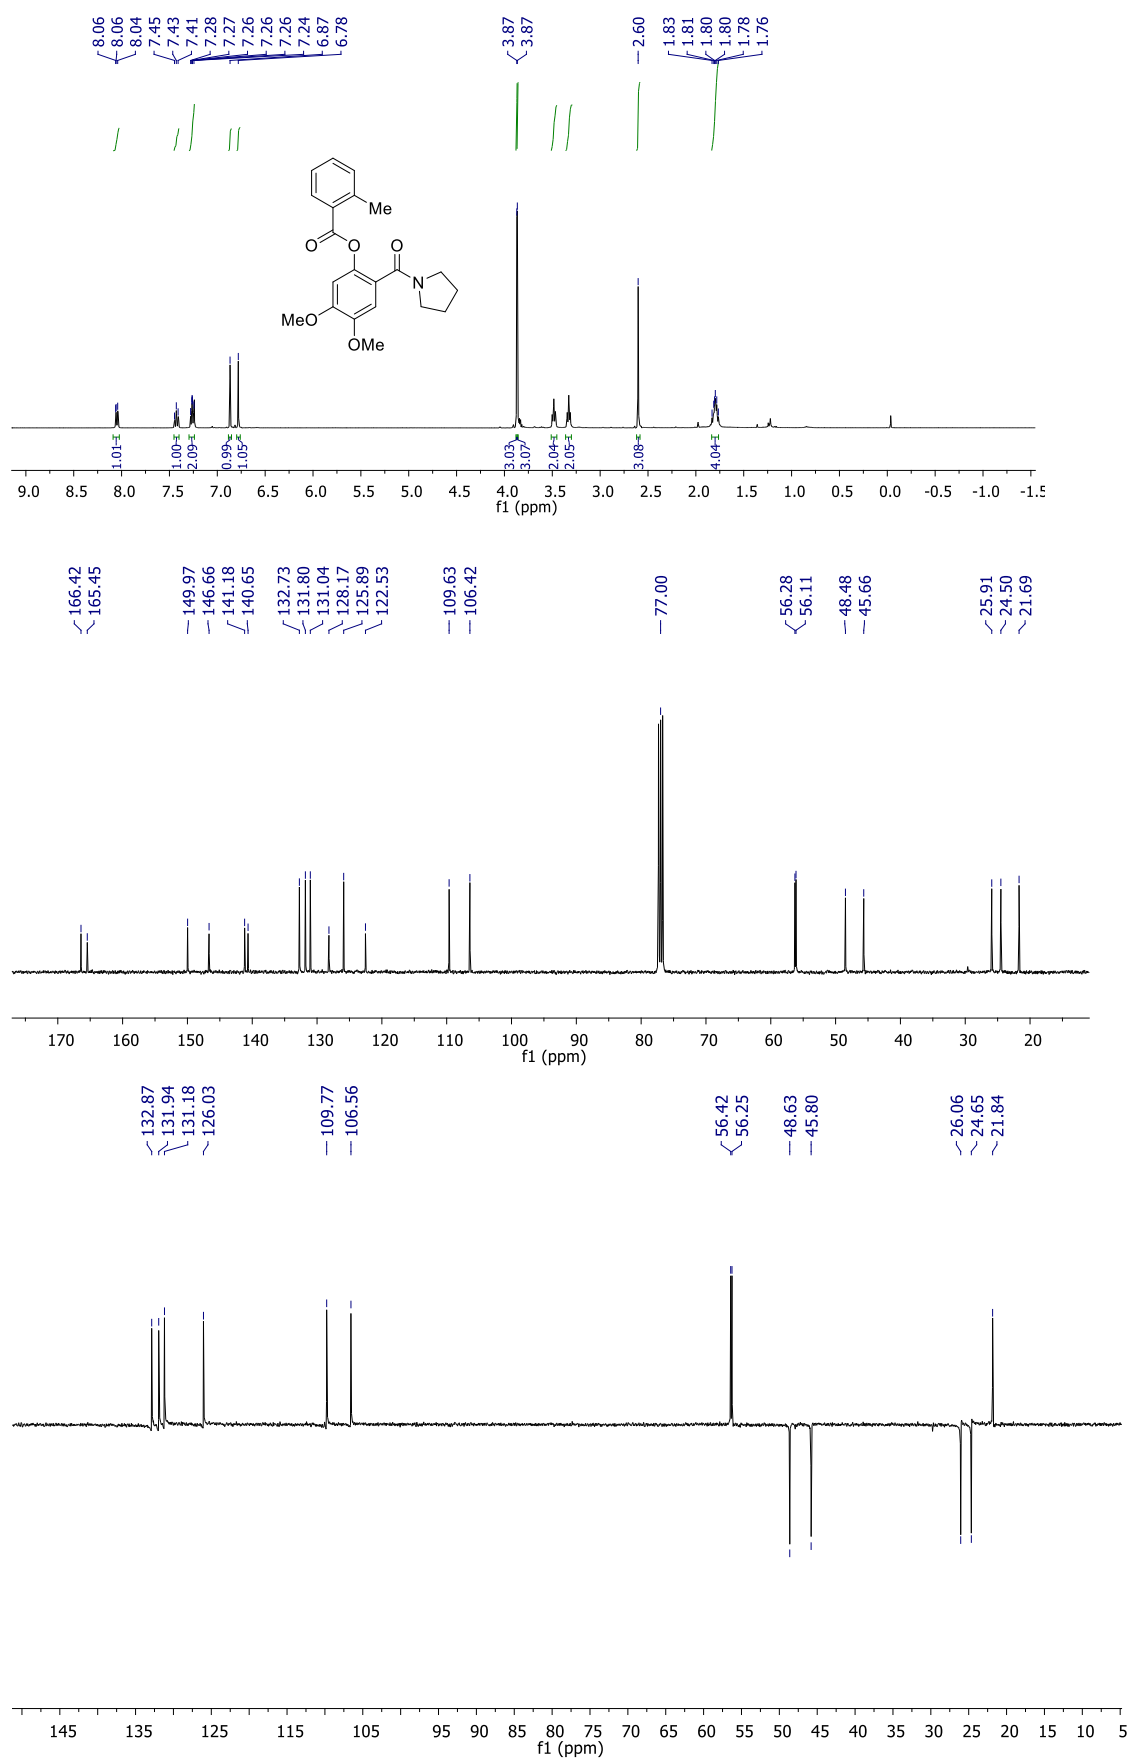

Spectral data of compound **3ak**.

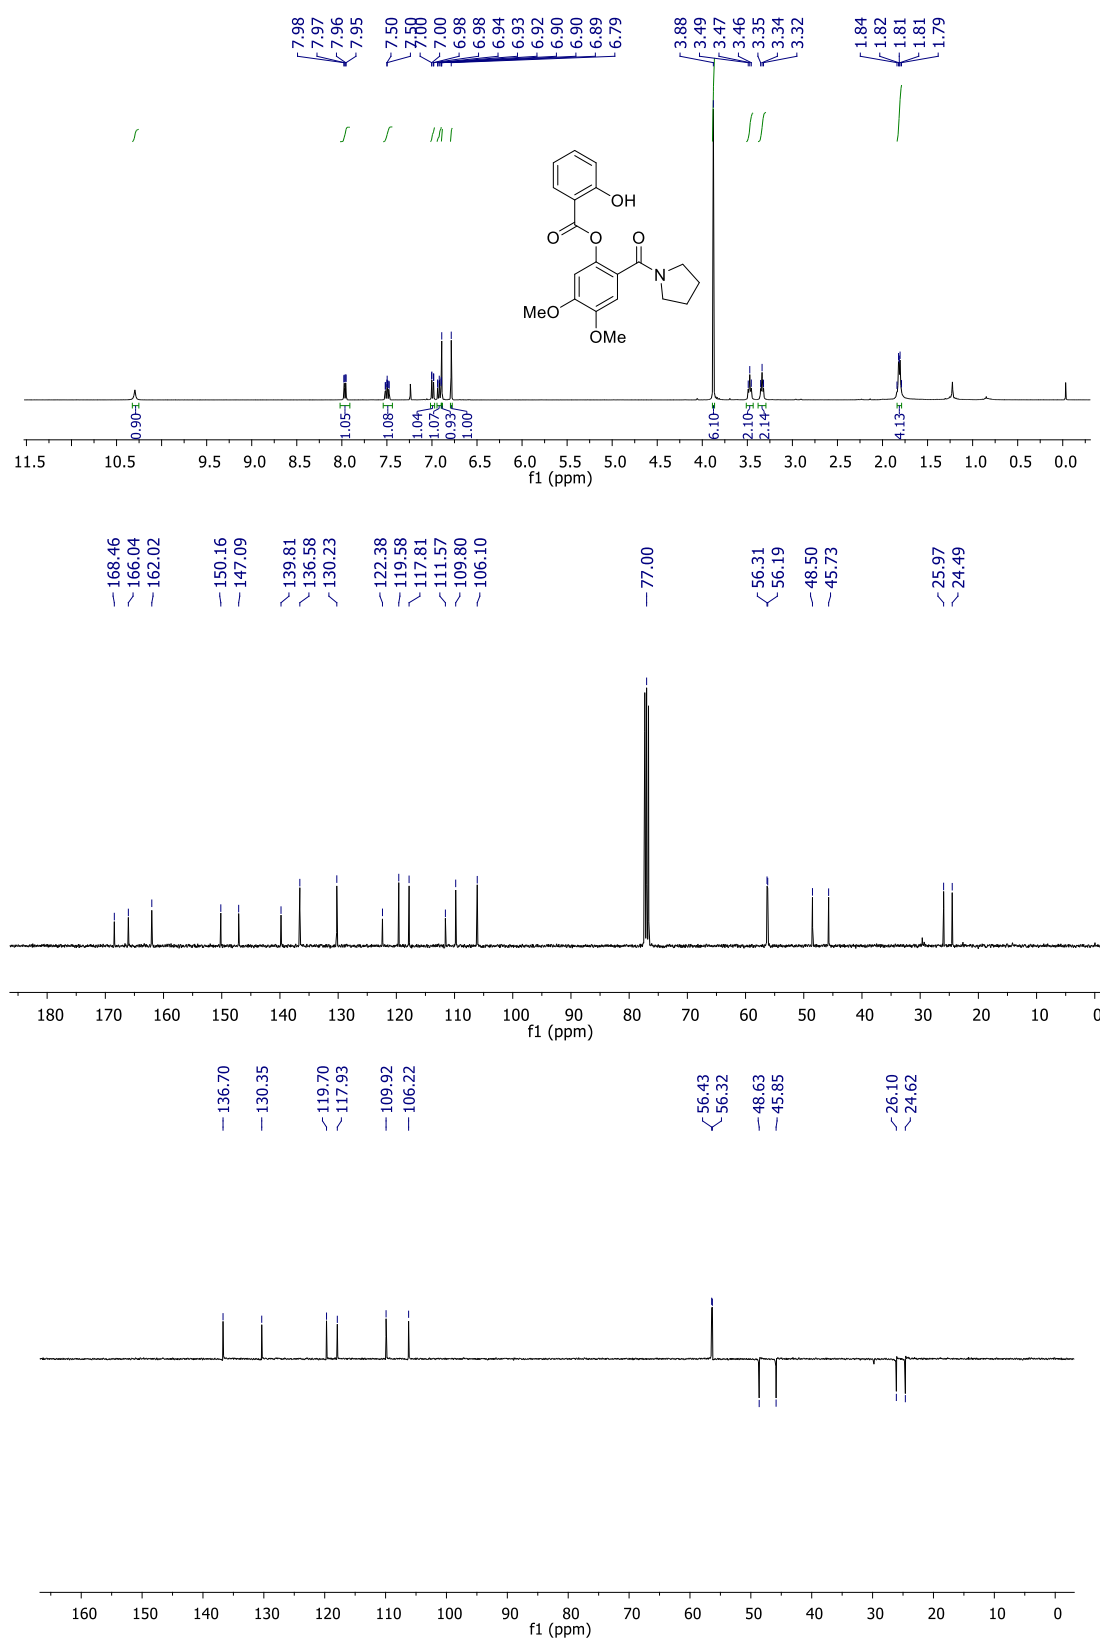

Spectral data of compound **3al**.

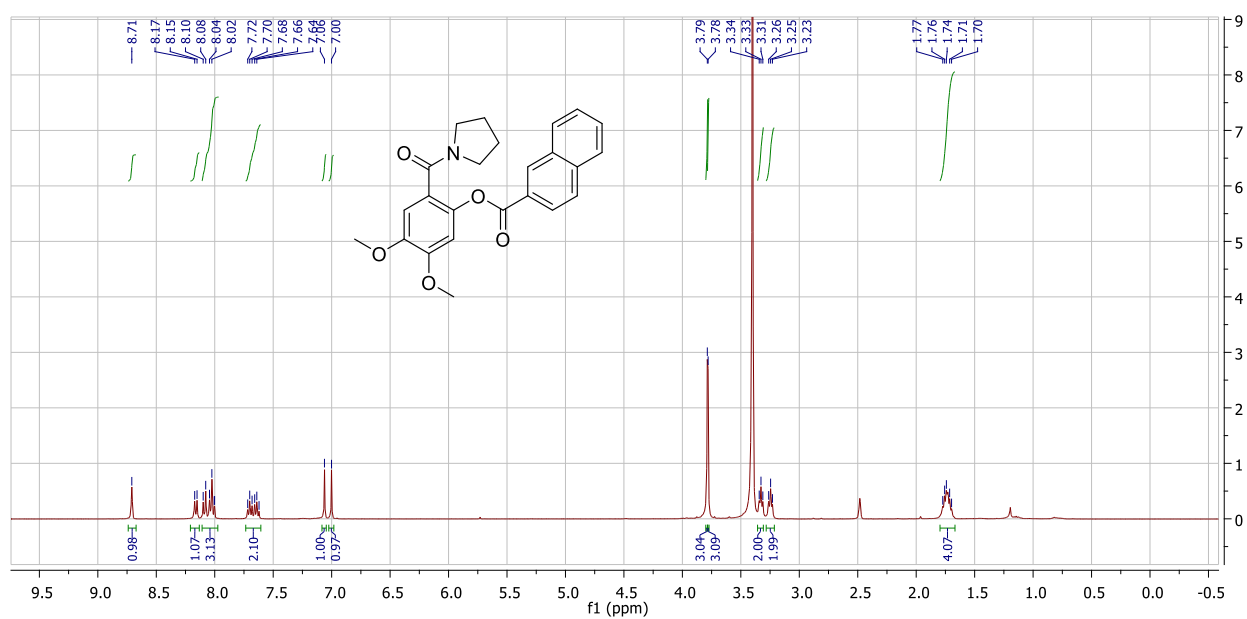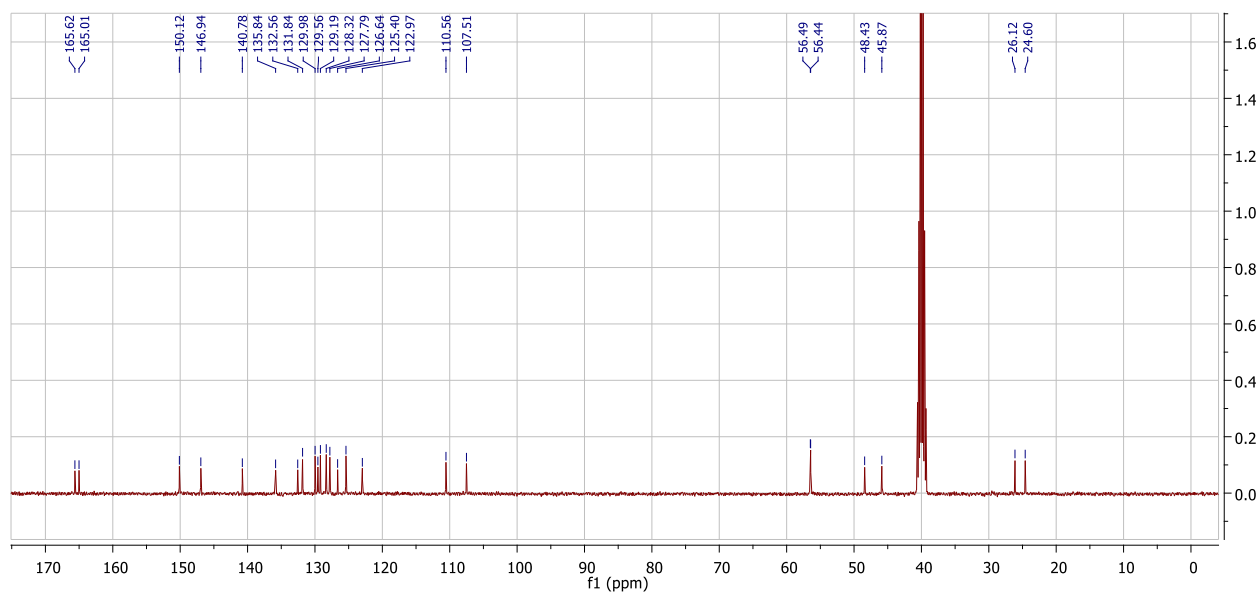

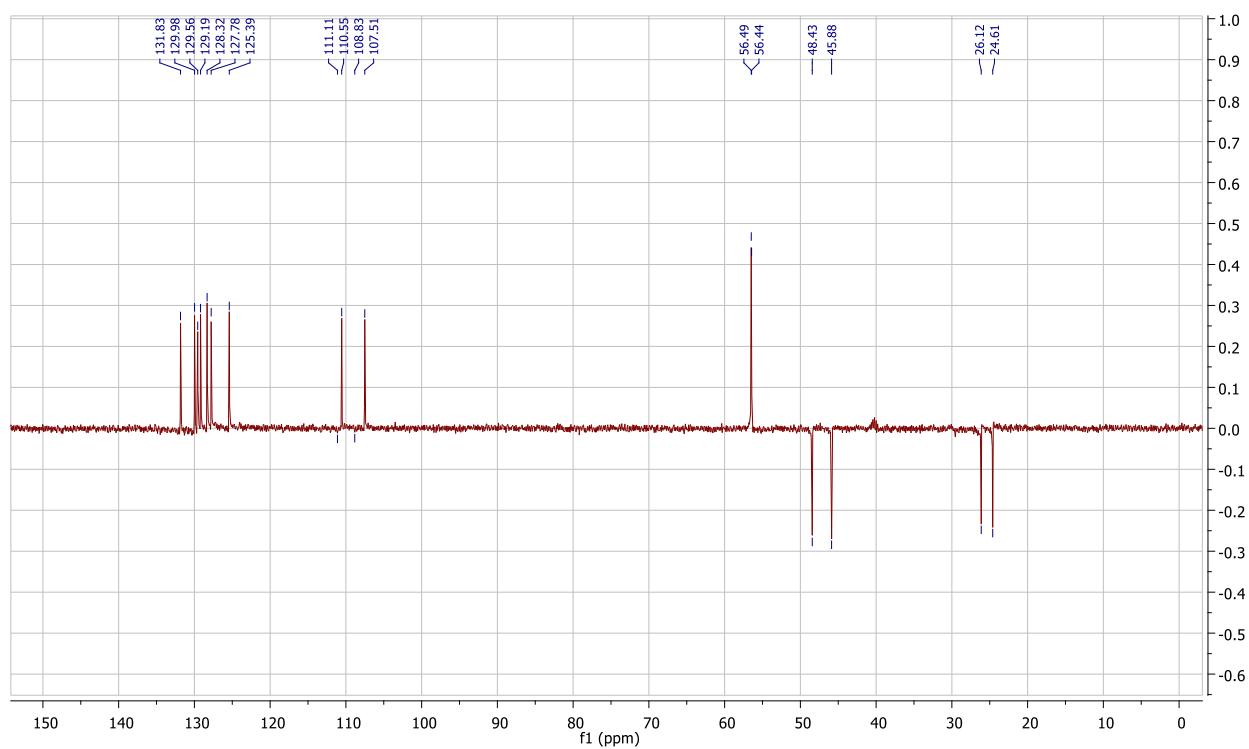



Spectral data of compound **3am**.

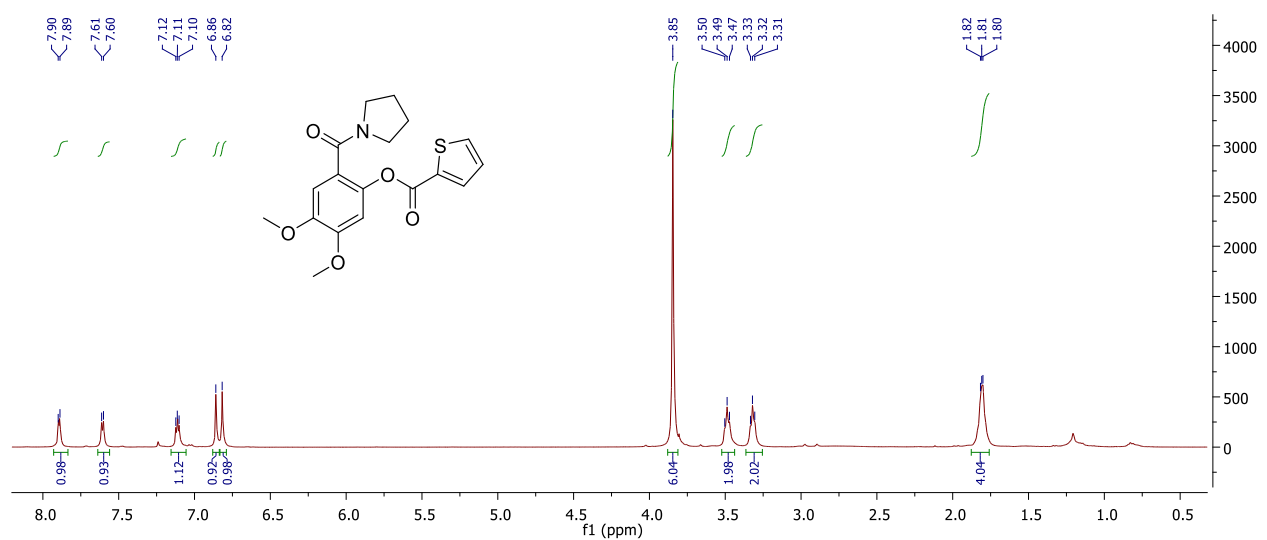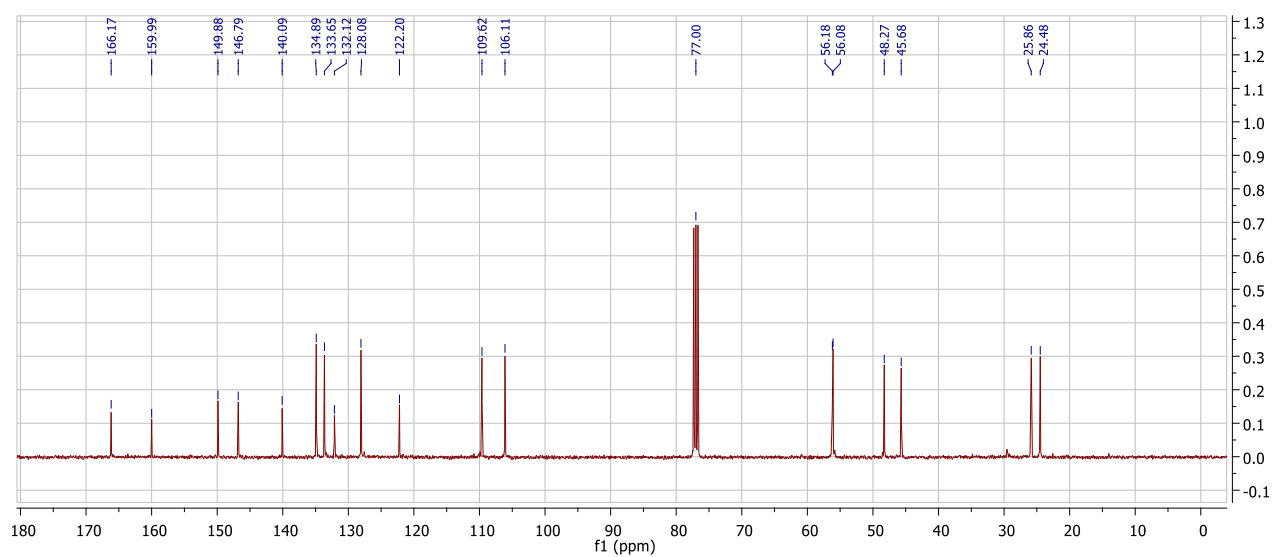

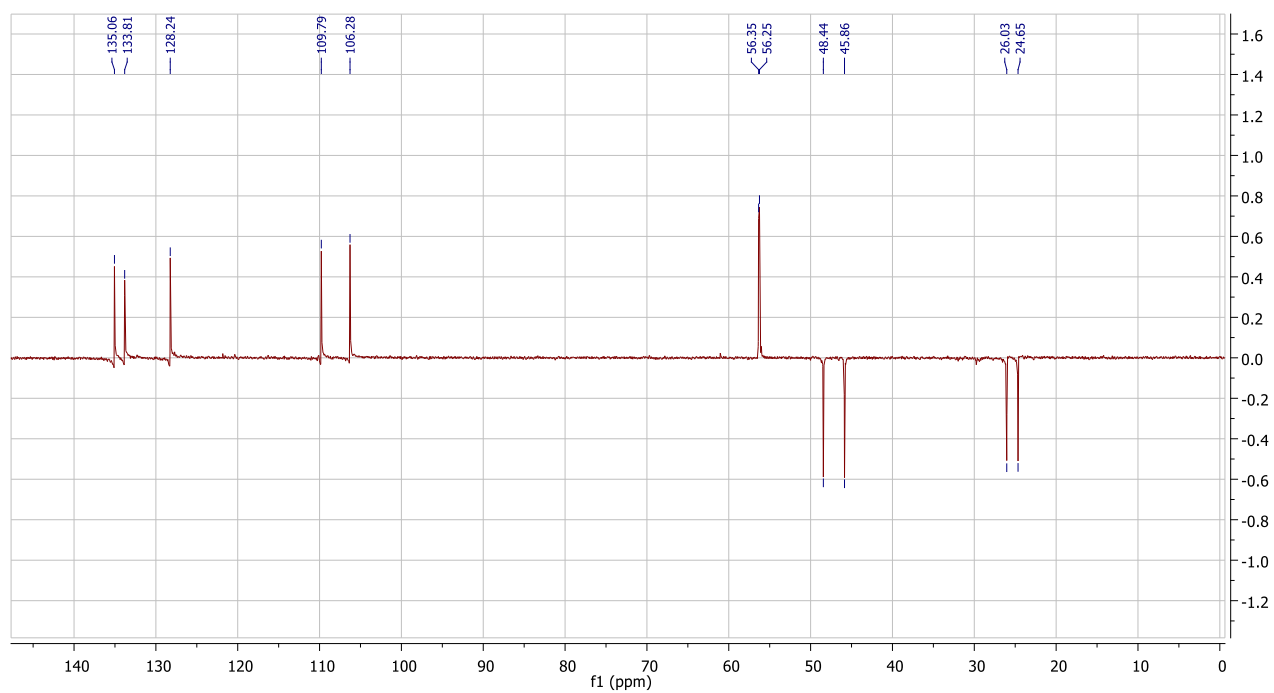

Spectral data of compound **5a**.

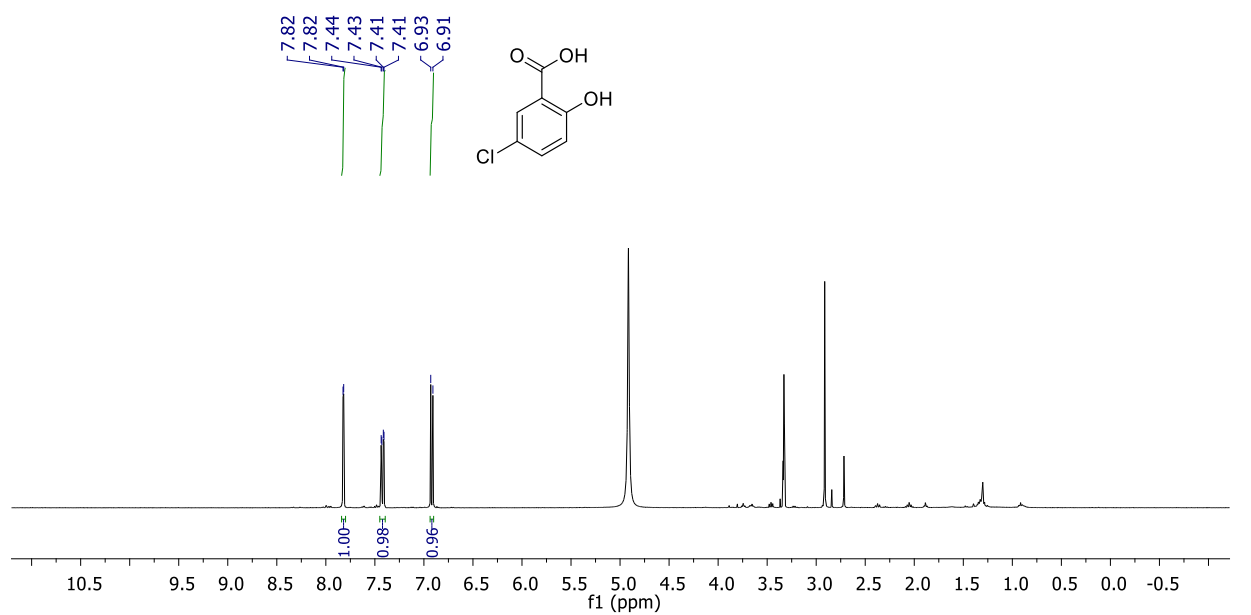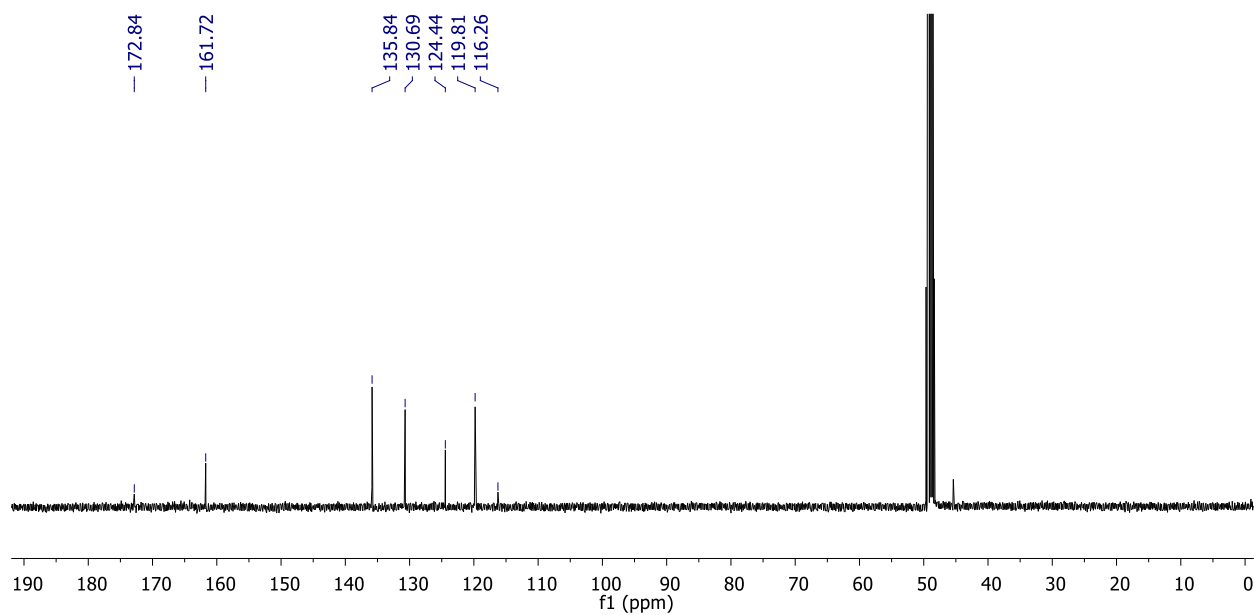

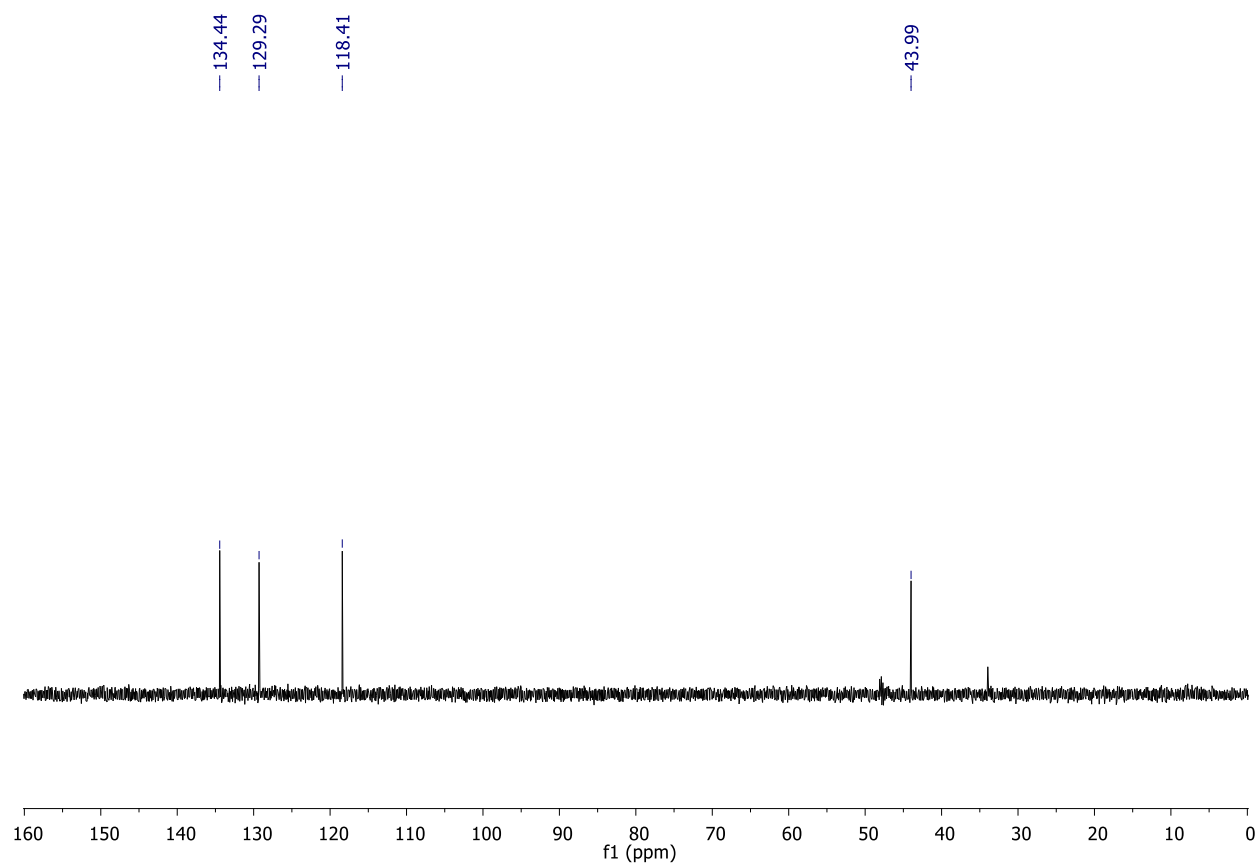

Spectral data of compound **4a**.

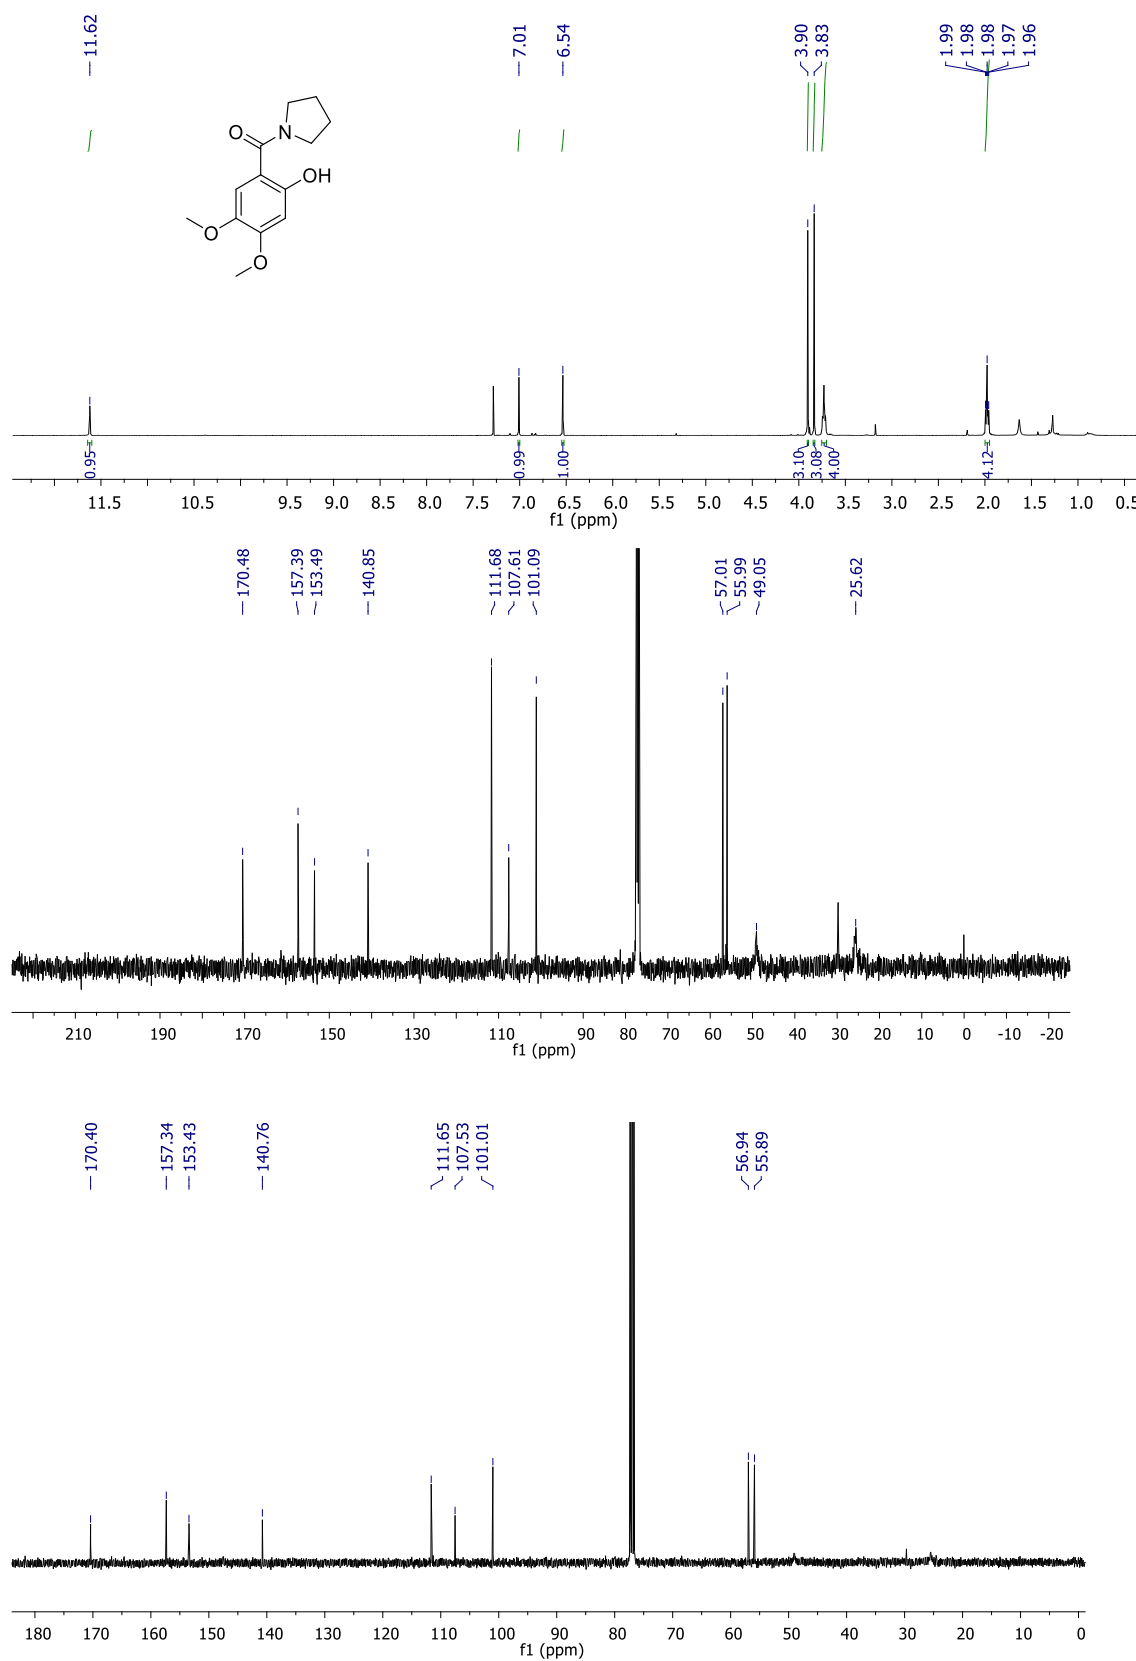

Spectral data of compound **6a**.

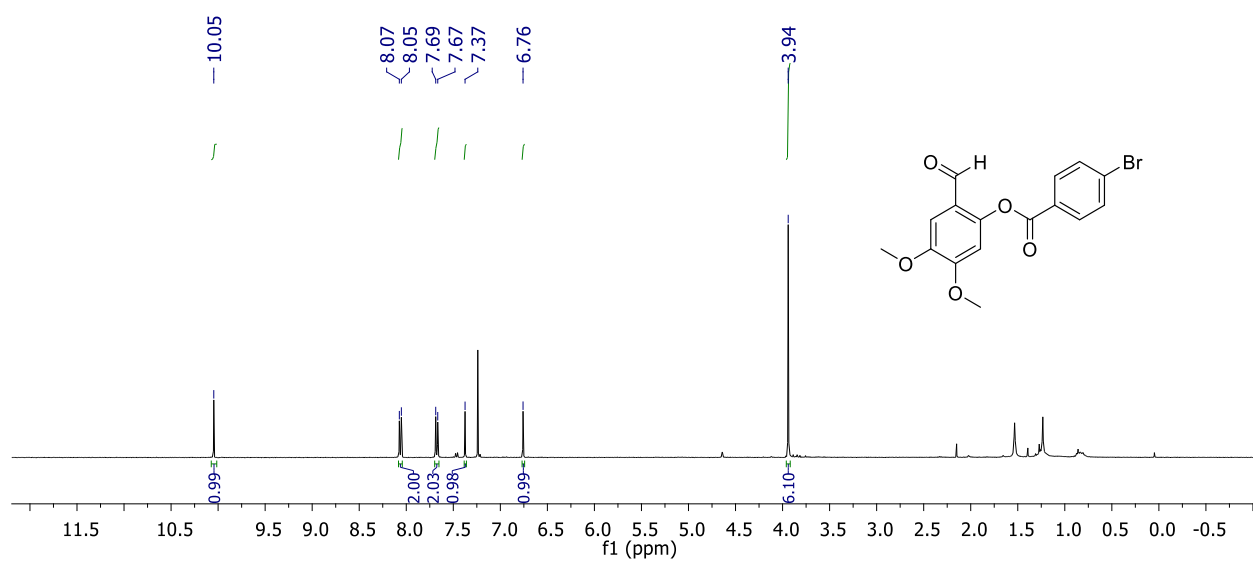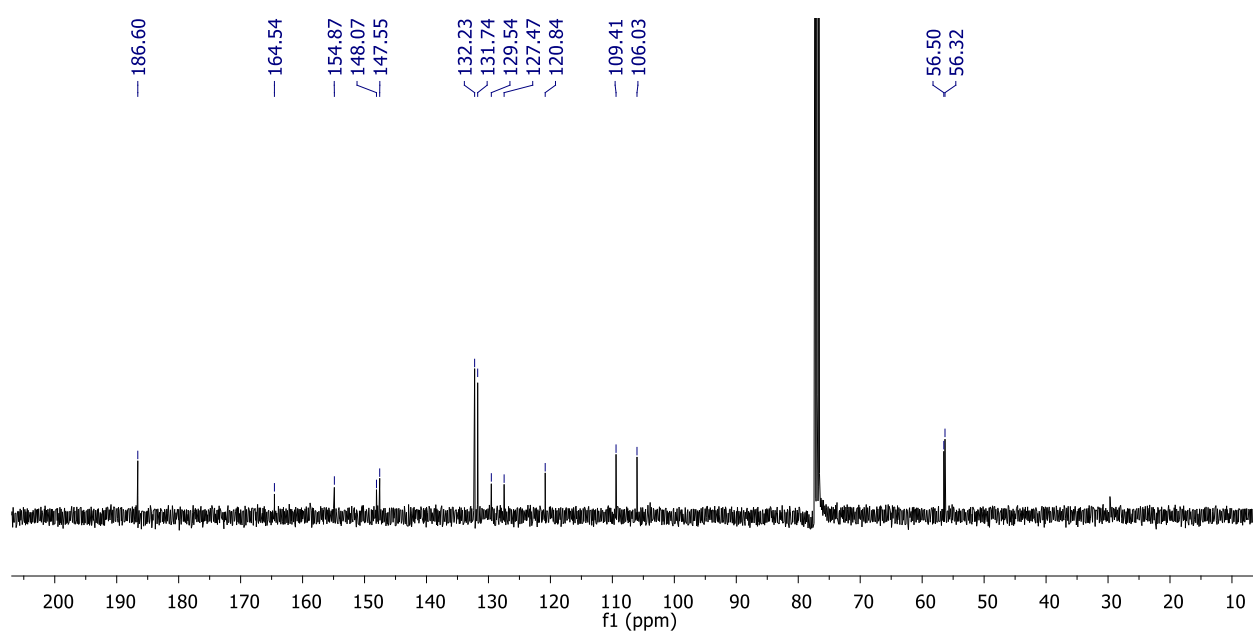

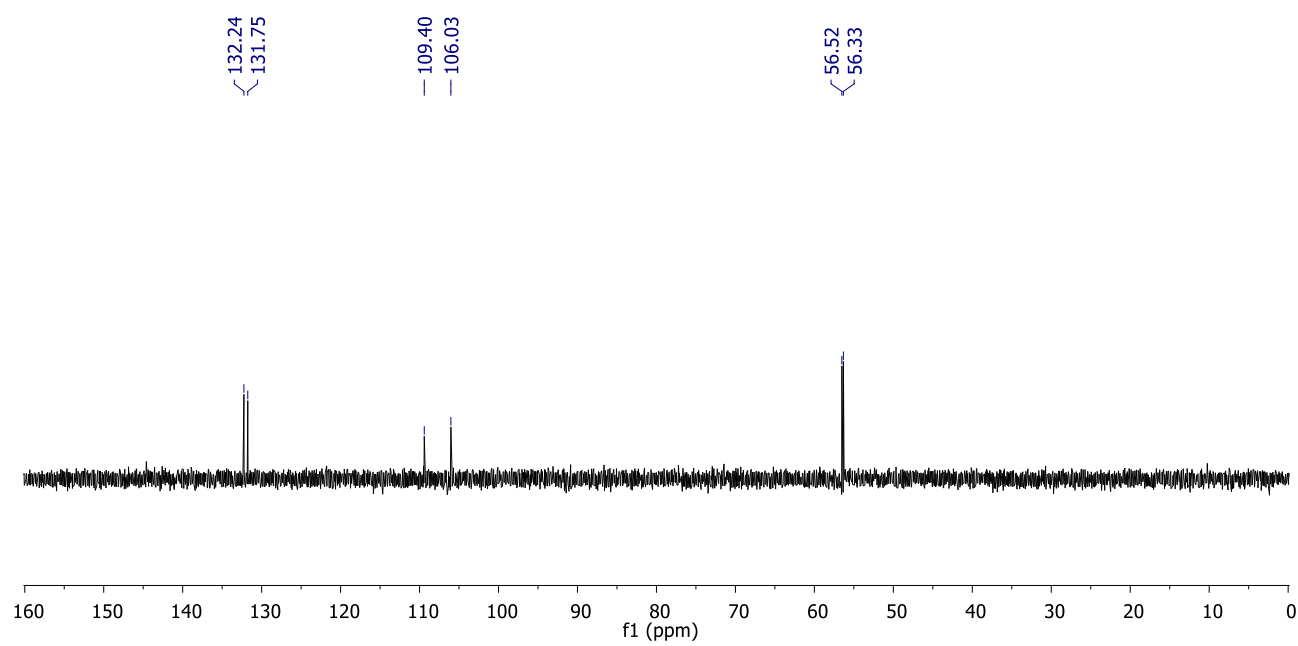

Spectral data of compound **6b**.

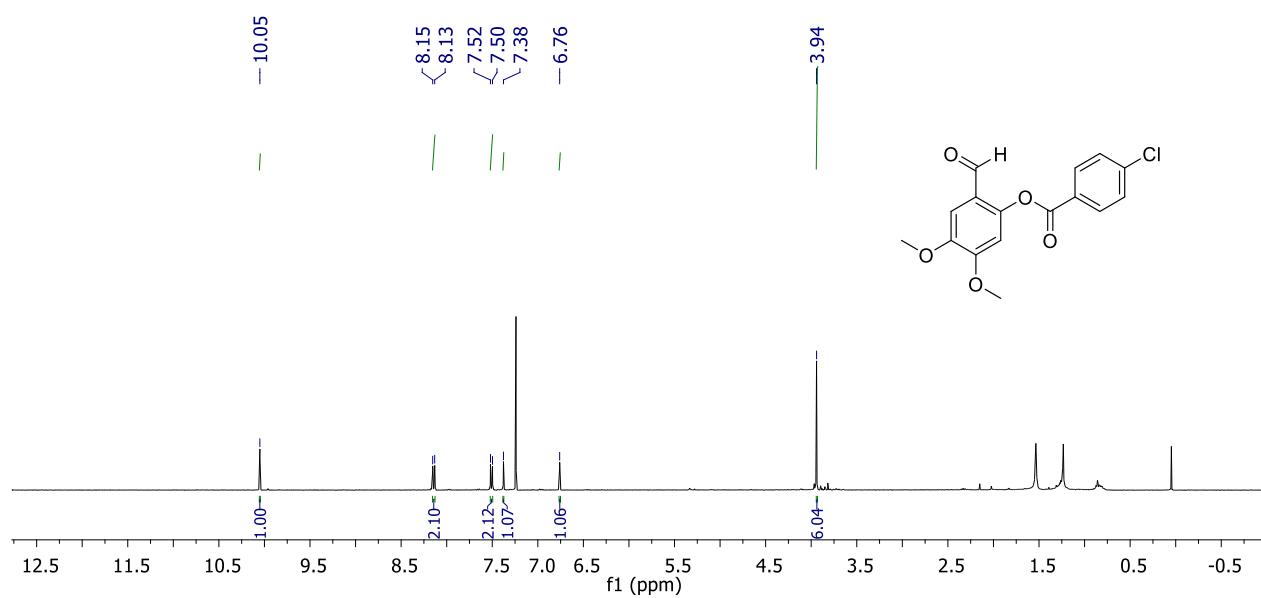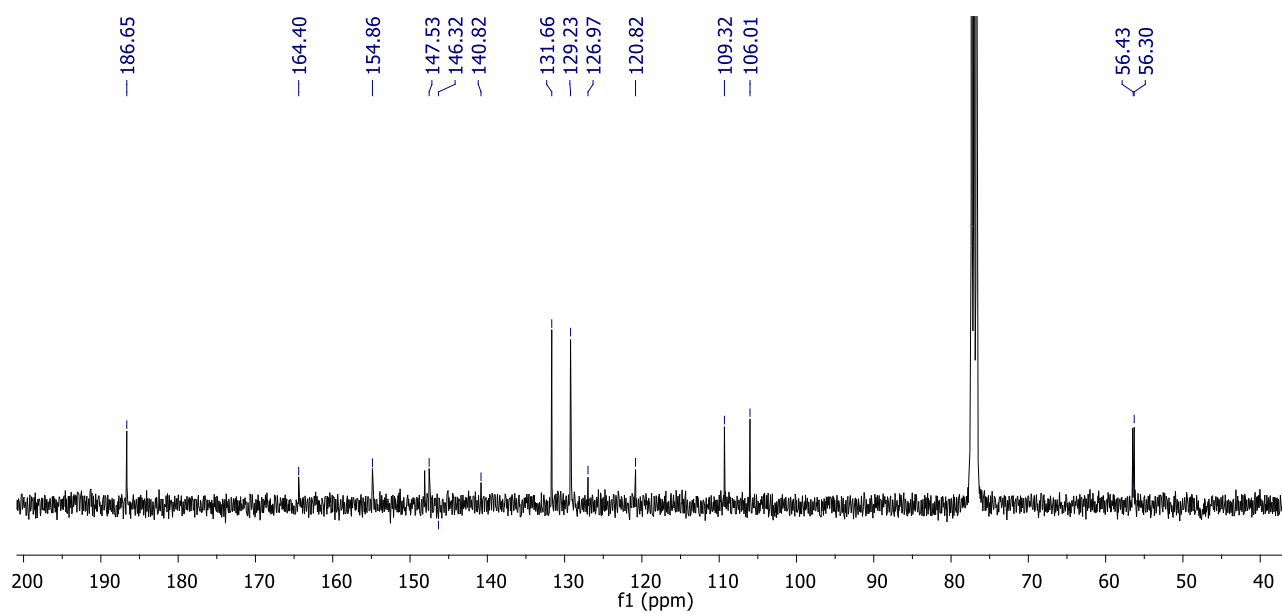



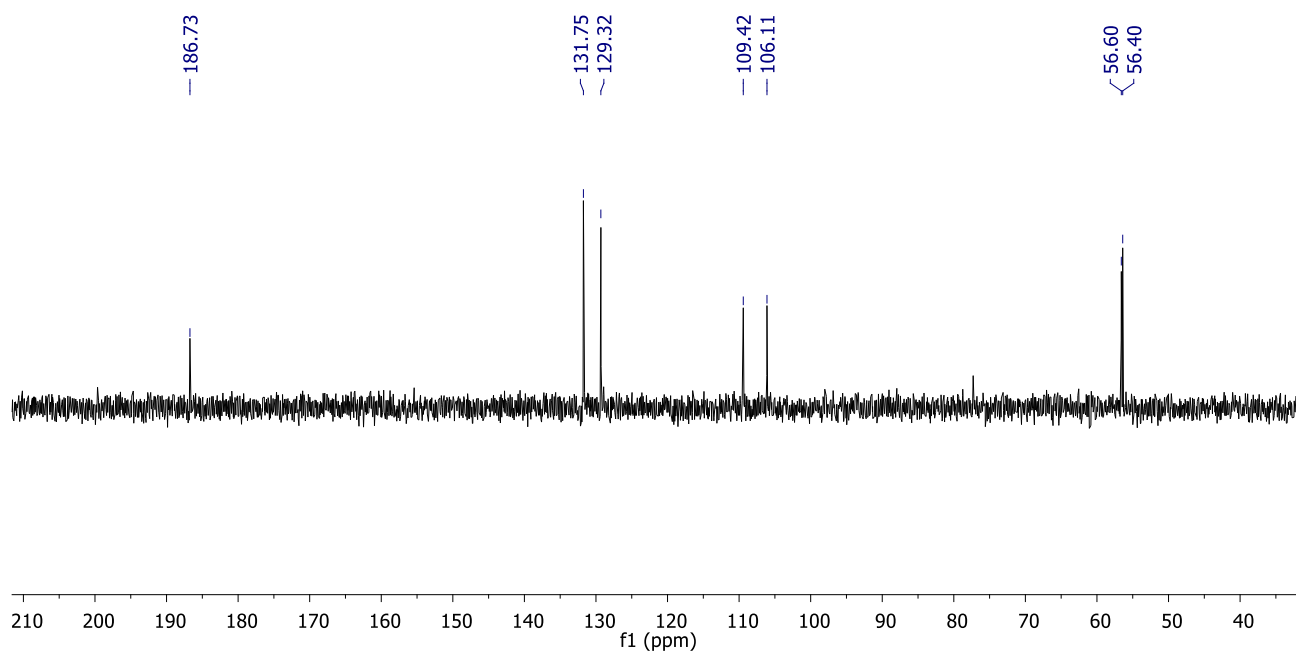

Supplement: Supplementary file 1 [file 9751288]
